# Supplementary material for: Predicting mechanical properties of non-equimolar high-entropy carbides using machine learning
Source: Royal Society of Chemistry journal article supplement (doi:10.1039/d4dd00243a), 2024-12-12
Supplement: d4dd00243a1.xlsx [file d4dd00243a1.xlsx]

## Sheet: Sheet1
formula	structure	young_modulus	total_energy	formation_energy
Hf1 Cr3 C4	Full Formula (Hf1 Cr3 C4) Reduced Formula: HfCr3C4 abc : 4.250008 4.250008 4.250008 angles: 90.000000 90.000000 90.000000 pbc : True True True Sites (8) # SP a b c --- ---- ---- ---- ---- 0 C 0 0.5 -0 1 C 0.5 0 -0 2 C -0 0 0.5 3 C 0.5 0.5 0.5 4 Cr 0 -0 0 5 Cr -0 0.5 0.5 6 Cr 0.5 -0 0.5 7 Hf 0.5 0.5 -0	389.372	-74.2883	-1.62354
Cr3 Mo1 C4	Full Formula (Cr3 Mo1 C4) Reduced Formula: Cr3MoC4 abc : 4.166834 4.166834 4.166834 angles: 90.000000 90.000000 90.000000 pbc : True True True Sites (8) # SP a b c --- ---- ---- ---- ---- 0 C -0 0.5 -0 1 C 0.5 -0 -0 2 C 0 0 0.5 3 C 0.5 0.5 0.5 4 Cr -0 0 0 5 Cr -0 0.5 0.5 6 Cr 0.5 0 0.5 7 Mo 0.5 0.5 0	415.446	-74.3539	-1.53174
Hf1 Cr2 Mo1 C4	Full Formula (Hf1 Cr2 Mo1 C4) Reduced Formula: HfCr2MoC4 abc : 4.311055 4.328722 4.328722 angles: 90.000000 90.000000 90.000000 pbc : True True True Sites (8) # SP a b c --- ---- ---- ---- ---- 0 C 0 0.5 0 1 C 0.5 -0 -0 2 C -0 -0 0.5 3 C 0.5 0.5 0.5 4 Cr 0 0 0 5 Cr -0 0.5 0.5 6 Hf 0.5 -0 0.5 7 Mo 0.5 0.5 0	405.053	-76.2357	-1.45447
Hf1 Nb1 Cr2 C4	Full Formula (Hf1 Nb1 Cr2 C4) Reduced Formula: HfNb(CrC2)2 abc : 4.333543 4.371472 4.371472 angles: 90.000000 90.000000 90.000000 pbc : True True True Sites (8) # SP a b c --- ---- --- --- --- 0 C 0 0.5 0 1 C 0.5 0 0 2 C 0 0 0.5 3 C 0.5 0.5 0.5 4 Cr 0 0 0 5 Cr 0 0.5 0.5 6 Hf 0.5 0 0.5 7 Nb 0.5 0.5 0	424.355	-76.6611	-1.67014
Ta3 Cr1 C4	Full Formula (Ta3 Cr1 C4) Reduced Formula: Ta3CrC4 abc : 4.405594 4.405594 4.405594 angles: 90.000000 90.000000 90.000000 pbc : True True True Sites (8) # SP a b c --- ---- ---- ---- ---- 0 C 0 0.5 0 1 C 0.5 0 0 2 C 0 -0 0.5 3 C 0.5 0.5 0.5 4 Cr -0 0 -0 5 Ta -0 0.5 0.5 6 Ta 0.5 -0 0.5 7 Ta 0.5 0.5 -0	497.59	-84.6212	-2.47765
Ta2 Ti1 Cr1 C4	Full Formula (Ta2 Ti1 Cr1 C4) Reduced Formula: Ta2TiCrC4 abc : 4.369714 4.369714 4.361220 angles: 90.000000 90.000000 90.000000 pbc : True True True Sites (8) # SP a b c --- ---- --- ---- ---- 0 C 0 0.5 -0 1 C 0.5 -0 -0 2 C 0 -0 0.5 3 C 0.5 0.5 0.5 4 Cr 0 -0 0 5 Ta 0 0.5 0.5 6 Ta 0.5 -0 0.5 7 Ti 0.5 0.5 -0	508.107	-81.0978	-2.13223
Ta2 V1 Cr1 C4	Full Formula (Ta2 V1 Cr1 C4) Reduced Formula: Ta2VCrC4 abc : 4.337549 4.337549 4.323245 angles: 90.000000 90.000000 90.000000 pbc : True True True Sites (8) # SP a b c --- ---- ---- ---- ---- 0 C -0 0.5 -0 1 C 0.5 -0 -0 2 C -0 -0 0.5 3 C 0.5 0.5 0.5 4 Cr 0 -0 0 5 Ta -0 0.5 0.5 6 Ta 0.5 -0 0.5 7 V 0.5 0.5 -0	486.849	-81.1466	-2.16833
Ta2 Cr1 W1 C4	Full Formula (Ta2 Cr1 W1 C4) Reduced Formula: Ta2CrWC4 abc : 4.373748 4.373748 4.379004 angles: 90.000000 90.000000 90.000000 pbc : True True True Sites (8) # SP a b c --- ---- ---- ---- ---- 0 C 0 0.5 -0 1 C 0.5 0 -0 2 C 0 0 0.5 3 C 0.5 0.5 0.5 4 Cr 0 0 0 5 Ta -0 0.5 0.5 6 Ta 0.5 -0 0.5 7 W 0.5 0.5 0	513.369	-84.1898	-2.23622
Zr1 Ta2 Cr1 C4	Full Formula (Zr1 Ta2 Cr1 C4) Reduced Formula: ZrTa2CrC4 abc : 4.451696 4.451696 4.471289 angles: 90.000000 90.000000 90.000000 pbc : True True True Sites (8) # SP a b c --- ---- --- ---- ---- 0 C 0 0.5 -0 1 C 0.5 -0 -0 2 C 0 -0 0.5 3 C 0.5 0.5 0.5 4 Cr 0 -0 0 5 Ta 0 0.5 0.5 6 Ta 0.5 -0 0.5 7 Zr 0.5 0.5 0	479.69	-81.4175	-2.15219
Ta1 Ti2 Cr1 C4	Full Formula (Ta1 Ti2 Cr1 C4) Reduced Formula: TaTi2CrC4 abc : 4.315222 4.326745 4.326745 angles: 90.000000 90.000000 90.000000 pbc : True True True Sites (8) # SP a b c --- ---- ---- ---- ---- 0 C 0 0.5 0 1 C 0.5 -0 -0 2 C -0 -0 0.5 3 C 0.5 0.5 0.5 4 Cr 0 -0 0 5 Ta 0 0.5 0.5 6 Ti 0.5 -0 0.5 7 Ti 0.5 0.5 0	471.776	-77.3572	-1.75965
Ta1 V2 Cr1 C4	Full Formula (Ta1 V2 Cr1 C4) Reduced Formula: TaV2CrC4 abc : 4.245554 4.242503 4.242503 angles: 90.000000 90.000000 90.000000 pbc : True True True Sites (8) # SP a b c --- ---- ---- ---- ---- 0 C -0 0.5 0 1 C 0.5 -0 -0 2 C 0 0 0.5 3 C 0.5 0.5 0.5 4 Cr 0 0 0 5 Ta -0 0.5 0.5 6 V 0.5 -0 0.5 7 V 0.5 0.5 -0	490.755	-77.9325	-1.89157
Ta1 Cr1 W2 C4	Full Formula (Ta1 Cr1 W2 C4) Reduced Formula: TaCr(WC2)2 abc : 4.342994 4.349472 4.349472 angles: 90.000000 90.000000 90.000000 pbc : True True True Sites (8) # SP a b c --- ---- ---- ---- ---- 0 C -0 0.5 -0 1 C 0.5 -0 0 2 C 0 0 0.5 3 C 0.5 0.5 0.5 4 Cr 0 0 -0 5 Ta -0 0.5 0.5 6 W 0.5 -0 0.5 7 W 0.5 0.5 0	503.29	-83.732	-1.99149
Zr2 Ta1 Cr1 C4	Full Formula (Zr2 Ta1 Cr1 C4) Reduced Formula: Zr2TaCrC4 abc : 4.485282 4.534372 4.534372 angles: 90.000000 90.000000 90.000000 pbc : True True True Sites (8) # SP a b c --- ---- ---- --- ---- 0 C -0 0.5 -0 1 C 0.5 0 -0 2 C 0 0 0.5 3 C 0.5 0.5 0.5 4 Cr 0 0 -0 5 Ta 0 0.5 0.5 6 Zr 0.5 0 0.5 7 Zr 0.5 0.5 -0	427.091	-78.1587	-1.81984
Ti3 Cr1 C4	Full Formula (Ti3 Cr1 C4) Reduced Formula: Ti3CrC4 abc : 4.271312 4.271312 4.271312 angles: 90.000000 90.000000 90.000000 pbc : True True True Sites (8) # SP a b c --- ---- ---- ---- ---- 0 C -0 0.5 -0 1 C 0.5 -0 -0 2 C -0 0 0.5 3 C 0.5 0.5 0.5 4 Cr -0 -0 0 5 Ti -0 0.5 0.5 6 Ti 0.5 0 0.5 7 Ti 0.5 0.5 0	454.173	-73.4502	-1.36628
Ti2 V1 Cr1 C4	Full Formula (Ti2 V1 Cr1 C4) Reduced Formula: Ti2VCrC4 abc : 4.233497 4.233497 4.207897 angles: 90.000000 90.000000 90.000000 pbc : True True True Sites (8) # SP a b c --- ---- ---- ---- ---- 0 C 0 0.5 -0 1 C 0.5 0 -0 2 C 0 -0 0.5 3 C 0.5 0.5 0.5 4 Cr -0 -0 0 5 Ti 0 0.5 0.5 6 Ti 0.5 -0 0.5 7 V 0.5 0.5 0	458.455	-73.975	-1.46187
Ti2 Cr1 W1 C4	Full Formula (Ti2 Cr1 W1 C4) Reduced Formula: Ti2CrWC4 abc : 4.289083 4.289083 4.267974 angles: 90.000000 90.000000 90.000000 pbc : True True True Sites (8) # SP a b c --- ---- --- ---- ---- 0 C 0 0.5 -0 1 C 0.5 0 -0 2 C 0 -0 0.5 3 C 0.5 0.5 0.5 4 Cr 0 0 -0 5 Ti 0 0.5 0.5 6 Ti 0.5 -0 0.5 7 W 0.5 0.5 0	506.835	-77.4468	-1.58335
Zr1 Ti2 Cr1 C4	Full Formula (Zr1 Ti2 Cr1 C4) Reduced Formula: ZrTi2CrC4 abc : 4.370782 4.370782 4.408949 angles: 90.000000 90.000000 90.000000 pbc : True True True Sites (8) # SP a b c --- ---- --- ---- ---- 0 C 0 0.5 -0 1 C 0.5 -0 -0 2 C 0 -0 0.5 3 C 0.5 0.5 0.5 4 Cr 0 -0 0 5 Ti 0 0.5 0.5 6 Ti 0.5 -0 0.5 7 Zr 0.5 0.5 -0	407.832	-73.4585	-1.34731
Ti1 V2 Cr1 C4	Full Formula (Ti1 V2 Cr1 C4) Reduced Formula: TiV2CrC4 abc : 4.184204 4.176539 4.176539 angles: 90.000000 90.000000 90.000000 pbc : True True True Sites (8) # SP a b c --- ---- ---- ---- ---- 0 C 0 0.5 0 1 C 0.5 -0 -0 2 C -0 0 0.5 3 C 0.5 0.5 0.5 4 Cr 0 0 -0 5 Ti 0 0.5 0.5 6 V 0.5 -0 0.5 7 V 0.5 0.5 -0	483.14	-74.5304	-1.5613
Ti1 Cr1 W2 C4	Full Formula (Ti1 Cr1 W2 C4) Reduced Formula: TiCr(WC2)2 abc : 4.284434 4.306602 4.306602 angles: 90.000000 90.000000 90.000000 pbc : True True True Sites (8) # SP a b c --- ---- ---- ---- ---- 0 C -0 0.5 0 1 C 0.5 0 0 2 C -0 0 0.5 3 C 0.5 0.5 0.5 4 Cr 0 0 0 5 Ti 0 0.5 0.5 6 W 0.5 -0 0.5 7 W 0.5 0.5 -0	524.214	-80.6764	-1.70455
Zr2 Ti1 Cr1 C4	Full Formula (Zr2 Ti1 Cr1 C4) Reduced Formula: Zr2TiCrC4 abc : 4.449495 4.508211 4.508211 angles: 90.000000 90.000000 90.000000 pbc : True True True Sites (8) # SP a b c --- ---- ---- --- ---- 0 C 0 0.5 -0 1 C 0.5 0 -0 2 C 0 0 0.5 3 C 0.5 0.5 0.5 4 Cr 0 0 -0 5 Ti -0 0.5 0.5 6 Zr 0.5 0 0.5 7 Zr 0.5 0.5 0	389.404	-73.9643	-1.39054
V3 Cr1 C4	Full Formula (V3 Cr1 C4) Reduced Formula: V3CrC4 abc : 4.133671 4.133671 4.133671 angles: 90.000000 90.000000 90.000000 pbc : True True True Sites (8) # SP a b c --- ---- ---- ---- ---- 0 C 0 0.5 0 1 C 0.5 0 0 2 C 0 -0 0.5 3 C 0.5 0.5 0.5 4 Cr -0 -0 -0 5 V 0 0.5 0.5 6 V 0.5 0 0.5 7 V 0.5 0.5 0	503.973	-75.1325	-1.66656
V2 Cr1 W1 C4	Full Formula (V2 Cr1 W1 C4) Reduced Formula: V2CrWC4 abc : 4.206146 4.206146 4.207661 angles: 90.000000 90.000000 90.000000 pbc : True True True Sites (8) # SP a b c --- ---- --- --- ---- 0 C 0 0.5 0 1 C 0.5 0 0 2 C 0 0 0.5 3 C 0.5 0.5 0.5 4 Cr 0 0 -0 5 V 0 0.5 0.5 6 V 0.5 0 0.5 7 W 0.5 0.5 -0	496.366	-77.9839	-1.71049
Zr1 V2 Cr1 C4	Full Formula (Zr1 V2 Cr1 C4) Reduced Formula: ZrV2CrC4 abc : 4.288555 4.288555 4.311664 angles: 90.000000 90.000000 90.000000 pbc : True True True Sites (8) # SP a b c --- ---- --- ---- ---- 0 C 0 0.5 0 1 C 0.5 -0 0 2 C 0 -0 0.5 3 C 0.5 0.5 0.5 4 Cr 0 -0 -0 5 V 0 0.5 0.5 6 V 0.5 -0 0.5 7 Zr 0.5 0.5 0	419.63	-74.0385	-1.47981
V1 Cr1 W2 C4	Full Formula (V1 Cr1 W2 C4) Reduced Formula: VCr(WC2)2 abc : 4.255835 4.273811 4.273811 angles: 90.000000 90.000000 90.000000 pbc : True True True Sites (8) # SP a b c --- ---- ---- ---- ---- 0 C 0 0.5 -0 1 C 0.5 0 -0 2 C 0 0 0.5 3 C 0.5 0.5 0.5 4 Cr -0 0 0 5 V -0 0.5 0.5 6 W 0.5 -0 0.5 7 W 0.5 0.5 0	490.398	-80.719	-1.73987
Hf1 Ta1 Cr2 C4	Full Formula (Hf1 Ta1 Cr2 C4) Reduced Formula: HfTa(CrC2)2 abc : 4.341462 4.370544 4.370544 angles: 90.000000 90.000000 90.000000 pbc : True True True Sites (8) # SP a b c --- ---- ---- ---- ---- 0 C -0 0.5 0 1 C 0.5 -0 -0 2 C 0 -0 0.5 3 C 0.5 0.5 0.5 4 Cr 0 -0 0 5 Cr -0 0.5 0.5 6 Hf 0.5 0 0.5 7 Ta 0.5 0.5 0	432.589	-78.4722	-1.89653
Zr2 V1 Cr1 C4	Full Formula (Zr2 V1 Cr1 C4) Reduced Formula: Zr2VCrC4 abc : 4.388136 4.477203 4.477203 angles: 90.000000 90.000000 90.000000 pbc : True True True Sites (8) # SP a b c --- ---- ---- --- --- 0 C -0 0.5 0 1 C 0.5 0 0 2 C 0 0 0.5 3 C 0.5 0.5 0.5 4 Cr -0 0 0 5 V -0 0.5 0.5 6 Zr 0.5 0 0.5 7 Zr 0.5 0.5 0	397.902	-74.0646	-1.43308
Cr1 W3 C4	Full Formula (Cr1 W3 C4) Reduced Formula: CrW3C4 abc : 4.320606 4.320606 4.320606 angles: 90.000000 90.000000 90.000000 pbc : True True True Sites (8) # SP a b c --- ---- ---- ---- ---- 0 C -0 0.5 -0 1 C 0.5 -0 -0 2 C 0 -0 0.5 3 C 0.5 0.5 0.5 4 Cr -0 0 0 5 W 0 0.5 0.5 6 W 0.5 0 0.5 7 W 0.5 0.5 0	459.088	-83.2575	-1.74469
Zr1 Cr1 W2 C4	Full Formula (Zr1 Cr1 W2 C4) Reduced Formula: ZrCr(WC2)2 abc : 4.393228 4.393228 4.389818 angles: 90.000000 90.000000 90.000000 pbc : True True True Sites (8) # SP a b c --- ---- --- ---- ---- 0 C 0 0.5 -0 1 C 0.5 -0 -0 2 C 0 -0 0.5 3 C 0.5 0.5 0.5 4 Cr 0 -0 0 5 W 0 0.5 0.5 6 W 0.5 -0 0.5 7 Zr 0.5 0.5 -0	459.739	-80.6719	-1.68399
Zr2 Cr1 W1 C4	Full Formula (Zr2 Cr1 W1 C4) Reduced Formula: Zr2CrWC4 abc : 4.440913 4.497651 4.497651 angles: 90.000000 90.000000 90.000000 pbc : True True True Sites (8) # SP a b c --- ---- ---- ---- ---- 0 C 0 0.5 0 1 C 0.5 -0 0 2 C -0 -0 0.5 3 C 0.5 0.5 0.5 4 Cr 0 -0 0 5 W 0 0.5 0.5 6 Zr 0.5 -0 0.5 7 Zr 0.5 0.5 -0	432.266	-77.8653	-1.59566
Zr3 Cr1 C4	Full Formula (Zr3 Cr1 C4) Reduced Formula: Zr3CrC4 abc : 4.584720 4.584720 4.584720 angles: 90.000000 90.000000 90.000000 pbc : True True True Sites (8) # SP a b c --- ---- --- --- --- 0 C 0 0.5 0 1 C 0.5 0 0 2 C 0 0 0.5 3 C 0.5 0.5 0.5 4 Cr 0 0 0 5 Zr 0 0.5 0.5 6 Zr 0.5 0 0.5 7 Zr 0.5 0.5 0	374.262	-74.8597	-1.48246
Hf3 Mo1 C4	Full Formula (Hf3 Mo1 C4) Reduced Formula: Hf3MoC4 abc : 4.570777 4.570777 4.570777 angles: 90.000000 90.000000 90.000000 pbc : True True True Sites (8) # SP a b c --- ---- ---- ---- ---- 0 C 0 0.5 0 1 C 0.5 0 0 2 C -0 0 0.5 3 C 0.5 0.5 0.5 4 Hf -0 0 -0 5 Hf -0 0.5 0.5 6 Hf 0.5 -0 0.5 7 Mo 0.5 0.5 -0	474.274	-82.8891	-1.66114
Hf3 Nb1 C4	Full Formula (Hf3 Nb1 C4) Reduced Formula: Hf3NbC4 abc : 4.602461 4.602461 4.602461 angles: 90.000000 90.000000 90.000000 pbc : True True True Sites (8) # SP a b c --- ---- ---- ---- ---- 0 C -0 0.5 -0 1 C 0.5 -0 -0 2 C -0 -0 0.5 3 C 0.5 0.5 0.5 4 Hf -0 -0 -0 5 Hf -0 0.5 0.5 6 Hf 0.5 -0 0.5 7 Nb 0.5 0.5 0	460.284	-83.9104	-1.95131
Hf3 Ta1 C4	Full Formula (Hf3 Ta1 C4) Reduced Formula: Hf3TaC4 abc : 4.596666 4.596666 4.596666 angles: 90.000000 90.000000 90.000000 pbc : True True True Sites (8) # SP a b c --- ---- ---- --- ---- 0 C -0 0.5 -0 1 C 0.5 0 -0 2 C -0 0 0.5 3 C 0.5 0.5 0.5 4 Hf -0 0 0 5 Hf -0 0.5 0.5 6 Hf 0.5 0 0.5 7 Ta 0.5 0.5 0	477.108	-85.7278	-2.17847
Hf3 Ti1 C4	Full Formula (Hf3 Ti1 C4) Reduced Formula: Hf3TiC4 abc : 4.583529 4.583529 4.583529 angles: 90.000000 90.000000 90.000000 pbc : True True True Sites (8) # SP a b c --- ---- ---- ---- ---- 0 C -0 0.5 0 1 C 0.5 -0 0 2 C -0 -0 0.5 3 C 0.5 0.5 0.5 4 Hf -0 0 -0 5 Hf -0 0.5 0.5 6 Hf 0.5 -0 0.5 7 Ti 0.5 0.5 0	438.606	-81.4734	-1.74167
Hf1 Ti1 Cr2 C4	Full Formula (Hf1 Ti1 Cr2 C4) Reduced Formula: HfTi(CrC2)2 abc : 4.278273 4.328159 4.328159 angles: 90.000000 90.000000 90.000000 pbc : True True True Sites (8) # SP a b c --- ---- ---- ---- ---- 0 C -0 0.5 -0 1 C 0.5 -0 0 2 C 0 0 0.5 3 C 0.5 0.5 0.5 4 Cr 0 -0 -0 5 Cr -0 0.5 0.5 6 Hf 0.5 0 0.5 7 Ti 0.5 0.5 0	412.692	-74.6773	-1.51716
Hf3 V1 C4	Full Formula (Hf3 V1 C4) Reduced Formula: Hf3VC4 abc : 4.550151 4.550151 4.550151 angles: 90.000000 90.000000 90.000000 pbc : True True True Sites (8) # SP a b c --- ---- ---- ---- ---- 0 C 0 0.5 0 1 C 0.5 -0 0 2 C 0 -0 0.5 3 C 0.5 0.5 0.5 4 Hf -0 0 -0 5 Hf -0 0.5 0.5 6 Hf 0.5 -0 0.5 7 V 0.5 0.5 -0	437.42	-81.2092	-1.73864
Hf3 W1 C4	Full Formula (Hf3 W1 C4) Reduced Formula: Hf3WC4 abc : 4.564676 4.564676 4.564676 angles: 90.000000 90.000000 90.000000 pbc : True True True Sites (8) # SP a b c --- ---- ---- ---- ---- 0 C 0 0.5 0 1 C 0.5 0 0 2 C 0 0 0.5 3 C 0.5 0.5 0.5 4 Hf 0 -0 0 5 Hf -0 0.5 0.5 6 Hf 0.5 -0 0.5 7 W 0.5 0.5 -0	495.246	-85.0716	-1.90895
Hf3 Zr1 C4	Full Formula (Hf3 Zr1 C4) Reduced Formula: Hf3ZrC4 abc : 4.661312 4.661312 4.661312 angles: 90.000000 90.000000 90.000000 pbc : True True True Sites (8) # SP a b c --- ---- --- --- ---- 0 C 0 0.5 0 1 C 0.5 0 0 2 C 0 0 0.5 3 C 0.5 0.5 0.5 4 Hf 0 0 0 5 Hf 0 0.5 0.5 6 Hf 0.5 0 0.5 7 Zr 0.5 0.5 -0	438.088	-82.7462	-1.88078
Hf2 Mo2 C4	Full Formula (Hf2 Mo2 C4) Reduced Formula: HfMoC2 abc : 4.479134 4.510598 4.510598 angles: 90.000000 90.000000 90.000000 pbc : True True True Sites (8) # SP a b c --- ---- ---- ---- ---- 0 C 0 0.5 0 1 C 0.5 -0 0 2 C 0 -0 0.5 3 C 0.5 0.5 0.5 4 Hf -0 -0 0 5 Hf -0 0.5 0.5 6 Mo 0.5 0 0.5 7 Mo 0.5 0.5 -0	470.87	-81.5333	-1.39166
Hf2 Nb1 Mo1 C4	Full Formula (Hf2 Nb1 Mo1 C4) Reduced Formula: Hf2NbMoC4 abc : 4.513828 4.539211 4.539211 angles: 90.000000 90.000000 90.000000 pbc : True True True Sites (8) # SP a b c --- ---- --- ---- ---- 0 C 0 0.5 -0 1 C 0.5 -0 0 2 C 0 -0 0.5 3 C 0.5 0.5 0.5 4 Hf 0 -0 -0 5 Hf 0 0.5 0.5 6 Mo 0.5 -0 0.5 7 Nb 0.5 0.5 0	467.5	-82.3737	-1.65921
Hf2 Ta1 Mo1 C4	Full Formula (Hf2 Ta1 Mo1 C4) Reduced Formula: Hf2TaMoC4 abc : 4.506267 4.538326 4.538326 angles: 90.000000 90.000000 90.000000 pbc : True True True Sites (8) # SP a b c --- ---- ---- ---- ---- 0 C -0 0.5 0 1 C 0.5 -0 -0 2 C -0 0 0.5 3 C 0.5 0.5 0.5 4 Hf 0 0 0 5 Hf 0 0.5 0.5 6 Mo 0.5 0 0.5 7 Ta 0.5 0.5 -0	483.523	-84.1457	-1.88071
Hf2 Ti1 Mo1 C4	Full Formula (Hf2 Ti1 Mo1 C4) Reduced Formula: Hf2TiMoC4 abc : 4.491483 4.507442 4.507442 angles: 90.000000 90.000000 90.000000 pbc : True True True Sites (8) # SP a b c --- ---- ---- ---- ---- 0 C 0 0.5 0 1 C 0.5 0 0 2 C -0 -0 0.5 3 C 0.5 0.5 0.5 4 Hf 0 -0 -0 5 Hf -0 0.5 0.5 6 Mo 0.5 -0 0.5 7 Ti 0.5 0.5 0	466.1	-80.2703	-1.49129
Hf2 V1 Mo1 C4	Full Formula (Hf2 V1 Mo1 C4) Reduced Formula: Hf2VMoC4 abc : 4.448300 4.481262 4.481262 angles: 90.000000 90.000000 90.000000 pbc : True True True Sites (8) # SP a b c --- ---- --- ---- ---- 0 C 0 0.5 -0 1 C 0.5 -0 0 2 C 0 -0 0.5 3 C 0.5 0.5 0.5 4 Hf 0 0 -0 5 Hf 0 0.5 0.5 6 Mo 0.5 0 0.5 7 V 0.5 0.5 0	447.195	-80.1055	-1.50069
Hf2 Mo1 W1 C4	Full Formula (Hf2 Mo1 W1 C4) Reduced Formula: Hf2MoWC4 abc : 4.471312 4.509258 4.509258 angles: 90.000000 90.000000 90.000000 pbc : True True True Sites (8) # SP a b c --- ---- ---- ---- ---- 0 C -0 0.5 0 1 C 0.5 0 -0 2 C 0 -0 0.5 3 C 0.5 0.5 0.5 4 Hf 0 -0 0 5 Hf -0 0.5 0.5 6 Mo 0.5 0 0.5 7 W 0.5 0.5 0	470.649	-83.6047	-1.62559
Hf1 V1 Cr2 C4	Full Formula (Hf1 V1 Cr2 C4) Reduced Formula: HfV(CrC2)2 abc : 4.260318 4.273003 4.273003 angles: 90.000000 90.000000 90.000000 pbc : True True True Sites (8) # SP a b c --- ---- ---- ---- ---- 0 C 0 0.5 0 1 C 0.5 0 -0 2 C 0 0 0.5 3 C 0.5 0.5 0.5 4 Cr -0 0 0 5 Cr -0 0.5 0.5 6 Hf 0.5 -0 0.5 7 V 0.5 0.5 0	426.859	-75.0353	-1.59191
Hf2 Zr1 Mo1 C4	Full Formula (Hf2 Zr1 Mo1 C4) Reduced Formula: Hf2ZrMoC4 abc : 4.588357 4.582708 4.582708 angles: 90.000000 90.000000 90.000000 pbc : True True True Sites (8) # SP a b c --- ---- --- --- ---- 0 C 0 0.5 0 1 C 0.5 0 0 2 C 0 0 0.5 3 C 0.5 0.5 0.5 4 Hf 0 0 0 5 Hf 0 0.5 0.5 6 Mo 0.5 0 0.5 7 Zr 0.5 0.5 -0	456.17	-81.2029	-1.58786
Hf2 Nb2 C4	Full Formula (Hf2 Nb2 C4) Reduced Formula: HfNbC2 abc : 4.550442 4.566537 4.566537 angles: 90.000000 90.000000 90.000000 pbc : True True True Sites (8) # SP a b c --- ---- ---- ---- ---- 0 C -0 0.5 -0 1 C 0.5 -0 -0 2 C -0 0 0.5 3 C 0.5 0.5 0.5 4 Hf -0 0 0 5 Hf -0 0.5 0.5 6 Nb 0.5 -0 0.5 7 Nb 0.5 0.5 0	478.206	-83.3171	-1.93964
Hf2 Ta1 Nb1 C4	Full Formula (Hf2 Ta1 Nb1 C4) Reduced Formula: Hf2TaNbC4 abc : 4.545922 4.561973 4.561973 angles: 90.000000 90.000000 90.000000 pbc : True True True Sites (8) # SP a b c --- ---- ---- ---- ---- 0 C -0 0.5 -0 1 C 0.5 0 -0 2 C -0 -0 0.5 3 C 0.5 0.5 0.5 4 Hf -0 -0 -0 5 Hf -0 0.5 0.5 6 Nb 0.5 0 0.5 7 Ta 0.5 0.5 -0	497.751	-85.1063	-2.16329
Hf2 Ti1 Nb1 C4	Full Formula (Hf2 Ti1 Nb1 C4) Reduced Formula: Hf2TiNbC4 abc : 4.529667 4.540281 4.540281 angles: 90.000000 90.000000 90.000000 pbc : True True True Sites (8) # SP a b c --- ---- --- ---- ---- 0 C 0 0.5 0 1 C 0.5 -0 -0 2 C 0 -0 0.5 3 C 0.5 0.5 0.5 4 Hf 0 -0 0 5 Hf 0 0.5 0.5 6 Nb 0.5 0 0.5 7 Ti 0.5 0.5 0	469.722	-81.1566	-1.76458
Hf2 Nb1 V1 C4	Full Formula (Hf2 Nb1 V1 C4) Reduced Formula: Hf2NbVC4 abc : 4.489325 4.512258 4.512258 angles: 90.000000 90.000000 90.000000 pbc : True True True Sites (8) # SP a b c --- ---- ---- ---- --- 0 C -0 0.5 0 1 C 0.5 0 0 2 C -0 0 0.5 3 C 0.5 0.5 0.5 4 Hf -0 0 0 5 Hf -0 0.5 0.5 6 Nb 0.5 -0 0.5 7 V 0.5 0.5 0	462.903	-80.8825	-1.76031
Hf2 Nb1 W1 C4	Full Formula (Hf2 Nb1 W1 C4) Reduced Formula: Hf2NbWC4 abc : 4.509362 4.533090 4.533090 angles: 90.000000 90.000000 90.000000 pbc : True True True Sites (8) # SP a b c --- ---- ---- ---- ---- 0 C 0 0.5 -0 1 C 0.5 0 0 2 C -0 0 0.5 3 C 0.5 0.5 0.5 4 Hf 0 0 0 5 Hf -0 0.5 0.5 6 Nb 0.5 -0 0.5 7 W 0.5 0.5 -0	474.14	-84.4735	-1.89668
Hf2 Zr1 Nb1 C4	Full Formula (Hf2 Zr1 Nb1 C4) Reduced Formula: Hf2ZrNbC4 abc : 4.618390 4.616362 4.616362 angles: 90.000000 90.000000 90.000000 pbc : True True True Sites (8) # SP a b c --- ---- ---- ---- ---- 0 C 0 0.5 0 1 C 0.5 -0 -0 2 C -0 -0 0.5 3 C 0.5 0.5 0.5 4 Hf 0 -0 0 5 Hf 0 0.5 0.5 6 Nb 0.5 -0 0.5 7 Zr 0.5 0.5 0	452.014	-82.2318	-1.87898
Hf1 Cr2 W1 C4	Full Formula (Hf1 Cr2 W1 C4) Reduced Formula: HfCr2WC4 abc : 4.317117 4.326985 4.326985 angles: 90.000000 90.000000 90.000000 pbc : True True True Sites (8) # SP a b c --- ---- ---- ---- ---- 0 C 0 0.5 -0 1 C 0.5 -0 -0 2 C -0 -0 0.5 3 C 0.5 0.5 0.5 4 Cr -0 0 -0 5 Cr 0 0.5 0.5 6 Hf 0.5 -0 0.5 7 W 0.5 0.5 0	438.785	-78.4286	-1.70357
Hf2 Ta2 C4	Full Formula (Hf2 Ta2 C4) Reduced Formula: HfTaC2 abc : 4.541874 4.557574 4.557574 angles: 90.000000 90.000000 90.000000 pbc : True True True Sites (8) # SP a b c --- ---- ---- ---- ---- 0 C -0 0.5 -0 1 C 0.5 -0 0 2 C 0 -0 0.5 3 C 0.5 0.5 0.5 4 Hf 0 -0 -0 5 Hf 0 0.5 0.5 6 Ta 0.5 0 0.5 7 Ta 0.5 0.5 0	516.372	-86.8879	-2.38598
Hf2 Ta1 Ti1 C4	Full Formula (Hf2 Ta1 Ti1 C4) Reduced Formula: Hf2TaTiC4 abc : 4.524094 4.535931 4.535931 angles: 90.000000 90.000000 90.000000 pbc : True True True Sites (8) # SP a b c --- ---- ---- ---- ---- 0 C -0 0.5 0 1 C 0.5 0 -0 2 C -0 0 0.5 3 C 0.5 0.5 0.5 4 Hf 0 0 0 5 Hf -0 0.5 0.5 6 Ta 0.5 -0 0.5 7 Ti 0.5 0.5 -0	487.751	-83.0077	-1.99597
Hf2 Ta1 V1 C4	Full Formula (Hf2 Ta1 V1 C4) Reduced Formula: Hf2TaVC4 abc : 4.485887 4.509137 4.509137 angles: 90.000000 90.000000 90.000000 pbc : True True True Sites (8) # SP a b c --- ---- ---- ---- ---- 0 C 0 0.5 -0 1 C 0.5 -0 0 2 C 0 -0 0.5 3 C 0.5 0.5 0.5 4 Hf -0 -0 -0 5 Hf 0 0.5 0.5 6 Ta 0.5 -0 0.5 7 V 0.5 0.5 0	476.666	-82.7119	-1.98899
Hf2 Ta1 W1 C4	Full Formula (Hf2 Ta1 W1 C4) Reduced Formula: Hf2TaWC4 abc : 4.502221 4.532308 4.532308 angles: 90.000000 90.000000 90.000000 pbc : True True True Sites (8) # SP a b c --- ---- ---- ---- ---- 0 C -0 0.5 -0 1 C 0.5 -0 0 2 C 0 -0 0.5 3 C 0.5 0.5 0.5 4 Hf -0 -0 -0 5 Hf -0 0.5 0.5 6 Ta 0.5 -0 0.5 7 W 0.5 0.5 -0	484.778	-86.2232	-2.11541
Hf2 Zr1 Ta1 C4	Full Formula (Hf2 Zr1 Ta1 C4) Reduced Formula: Hf2ZrTaC4 abc : 4.611298 4.610484 4.610484 angles: 90.000000 90.000000 90.000000 pbc : True True True Sites (8) # SP a b c --- ---- ---- --- ---- 0 C 0 0.5 0 1 C 0.5 0 -0 2 C -0 0 0.5 3 C 0.5 0.5 0.5 4 Hf -0 0 0 5 Hf -0 0.5 0.5 6 Ta 0.5 0 0.5 7 Zr 0.5 0.5 -0	469.839	-84.0434	-2.10542
Hf2 Ti2 C4	Full Formula (Hf2 Ti2 C4) Reduced Formula: HfTiC2 abc : 4.501171 4.517057 4.517057 angles: 90.000000 90.000000 90.000000 pbc : True True True Sites (8) # SP a b c --- ---- ---- ---- ---- 0 C -0 0.5 0 1 C 0.5 -0 0 2 C 0 0 0.5 3 C 0.5 0.5 0.5 4 Hf 0 0 -0 5 Hf 0 0.5 0.5 6 Ti 0.5 -0 0.5 7 Ti 0.5 0.5 0	436.893	-78.7364	-1.55705
Hf1 Zr1 Cr2 C4	Full Formula (Hf1 Zr1 Cr2 C4) Reduced Formula: HfZr(CrC2)2 abc : 4.355680 4.449531 4.449531 angles: 90.000000 90.000000 90.000000 pbc : True True True Sites (8) # SP a b c --- ---- ---- ---- ---- 0 C -0 0.5 0 1 C 0.5 0 0 2 C 0 0 0.5 3 C 0.5 0.5 0.5 4 Cr 0 -0 0 5 Cr -0 0.5 0.5 6 Hf 0.5 0 0.5 7 Zr 0.5 0.5 -0	382.865	-74.8682	-1.52102
Hf2 Ti1 V1 C4	Full Formula (Hf2 Ti1 V1 C4) Reduced Formula: Hf2TiVC4 abc : 4.453452 4.484494 4.484494 angles: 90.000000 90.000000 90.000000 pbc : True True True Sites (8) # SP a b c --- ---- ---- ---- ---- 0 C 0 0.5 0 1 C 0.5 0 0 2 C -0 0 0.5 3 C 0.5 0.5 0.5 4 Hf -0 -0 -0 5 Hf 0 0.5 0.5 6 Ti 0.5 -0 0.5 7 V 0.5 0.5 -0	442.64	-78.6401	-1.57501
Hf2 Ti1 W1 C4	Full Formula (Hf2 Ti1 W1 C4) Reduced Formula: Hf2TiWC4 abc : 4.486718 4.501509 4.501509 angles: 90.000000 90.000000 90.000000 pbc : True True True Sites (8) # SP a b c --- ---- --- ---- ---- 0 C 0 0.5 0 1 C 0.5 -0 -0 2 C 0 -0 0.5 3 C 0.5 0.5 0.5 4 Hf 0 -0 0 5 Hf 0 0.5 0.5 6 Ti 0.5 0 0.5 7 W 0.5 0.5 -0	489.121	-82.4972	-1.74464
Hf2 Zr1 Ti1 C4	Full Formula (Hf2 Zr1 Ti1 C4) Reduced Formula: Hf2ZrTiC4 abc : 4.600942 4.597567 4.597567 angles: 90.000000 90.000000 90.000000 pbc : True True True Sites (8) # SP a b c --- ---- ---- ---- ---- 0 C -0 0.5 -0 1 C 0.5 -0 -0 2 C 0 -0 0.5 3 C 0.5 0.5 0.5 4 Hf 0 -0 -0 5 Hf 0 0.5 0.5 6 Ti 0.5 -0 0.5 7 Zr 0.5 0.5 0	424.736	-79.7681	-1.66601
Hf2 V2 C4	Full Formula (Hf2 V2 C4) Reduced Formula: HfVC2 abc : 4.399884 4.455553 4.455553 angles: 90.000000 90.000000 90.000000 pbc : True True True Sites (8) # SP a b c --- ---- ---- ---- ---- 0 C -0 0.5 -0 1 C 0.5 0 0 2 C 0 -0 0.5 3 C 0.5 0.5 0.5 4 Hf 0 0 -0 5 Hf -0 0.5 0.5 6 V 0.5 -0 0.5 7 V 0.5 0.5 -0	458.684	-78.5936	-1.5992
Hf2 V1 W1 C4	Full Formula (Hf2 V1 W1 C4) Reduced Formula: Hf2VWC4 abc : 4.447539 4.475711 4.475711 angles: 90.000000 90.000000 90.000000 pbc : True True True Sites (8) # SP a b c --- ---- ---- ---- ---- 0 C 0 0.5 0 1 C 0.5 -0 -0 2 C -0 0 0.5 3 C 0.5 0.5 0.5 4 Hf -0 0 0 5 Hf -0 0.5 0.5 6 V 0.5 0 0.5 7 W 0.5 0.5 0	463.277	-82.2929	-1.74911
Hf2 Zr1 V1 C4	Full Formula (Hf2 Zr1 V1 C4) Reduced Formula: Hf2ZrVC4 abc : 4.569836 4.561836 4.561836 angles: 90.000000 90.000000 90.000000 pbc : True True True Sites (8) # SP a b c --- ---- ---- ---- ---- 0 C -0 0.5 -0 1 C 0.5 -0 -0 2 C 0 -0 0.5 3 C 0.5 0.5 0.5 4 Hf -0 -0 -0 5 Hf -0 0.5 0.5 6 V 0.5 -0 0.5 7 Zr 0.5 0.5 0	423.206	-79.4898	-1.66123
Hf2 W2 C4	Full Formula (Hf2 W2 C4) Reduced Formula: HfWC2 abc : 4.464797 4.507523 4.507523 angles: 90.000000 90.000000 90.000000 pbc : True True True Sites (8) # SP a b c --- ---- ---- ---- ---- 0 C -0 0.5 -0 1 C 0.5 -0 0 2 C 0 -0 0.5 3 C 0.5 0.5 0.5 4 Hf 0 -0 -0 5 Hf 0 0.5 0.5 6 W 0.5 0 0.5 7 W 0.5 0.5 0	474.791	-85.6247	-1.85309
Hf2 Zr1 W1 C4	Full Formula (Hf2 Zr1 W1 C4) Reduced Formula: Hf2ZrWC4 abc : 4.580100 4.576324 4.576324 angles: 90.000000 90.000000 90.000000 pbc : True True True Sites (8) # SP a b c --- ---- ---- ---- ---- 0 C 0 0.5 -0 1 C 0.5 -0 -0 2 C -0 -0 0.5 3 C 0.5 0.5 0.5 4 Hf 0 -0 -0 5 Hf 0 0.5 0.5 6 W 0.5 -0 0.5 7 Zr 0.5 0.5 0	476.323	-83.3776	-1.8347
Hf2 Zr2 C4	Full Formula (Hf2 Zr2 C4) Reduced Formula: HfZrC2 abc : 4.677377 4.677097 4.677097 angles: 90.000000 90.000000 90.000000 pbc : True True True Sites (8) # SP a b c --- ---- ---- ---- --- 0 C 0 0.5 0 1 C 0.5 -0 0 2 C -0 0 0.5 3 C 0.5 0.5 0.5 4 Hf -0 0 0 5 Hf -0 0.5 0.5 6 Zr 0.5 0 0.5 7 Zr 0.5 0.5 0	424.252	-81.0972	-1.81215
Hf1 Mo3 C4	Full Formula (Hf1 Mo3 C4) Reduced Formula: HfMo3C4 abc : 4.435131 4.435131 4.435131 angles: 90.000000 90.000000 90.000000 pbc : True True True Sites (8) # SP a b c --- ---- ---- ---- ---- 0 C 0 0.5 0 1 C 0.5 0 0 2 C 0 -0 0.5 3 C 0.5 0.5 0.5 4 Hf 0 0 0 5 Mo -0 0.5 0.5 6 Mo 0.5 -0 0.5 7 Mo 0.5 0.5 -0	450.162	-80.3183	-1.13979
Cr2 Mo2 C4	Full Formula (Cr2 Mo2 C4) Reduced Formula: CrMoC2 abc : 4.235857 4.254033 4.254033 angles: 90.000000 90.000000 90.000000 pbc : True True True Sites (8) # SP a b c --- ---- ---- ---- ---- 0 C -0 0.5 -0 1 C 0.5 0 -0 2 C -0 -0 0.5 3 C 0.5 0.5 0.5 4 Cr -0 -0 -0 5 Cr 0 0.5 0.5 6 Mo 0.5 -0 0.5 7 Mo 0.5 0.5 0	425.546	-75.7309	-1.29137
Hf1 Nb1 Mo2 C4	Full Formula (Hf1 Nb1 Mo2 C4) Reduced Formula: HfNb(MoC2)2 abc : 4.462256 4.462256 4.463932 angles: 90.000000 90.000000 90.000000 pbc : True True True Sites (8) # SP a b c --- ---- --- ---- ---- 0 C 0 0.5 -0 1 C 0.5 -0 -0 2 C 0 -0 0.5 3 C 0.5 0.5 0.5 4 Hf 0 -0 0 5 Mo 0 0.5 0.5 6 Mo 0.5 -0 0.5 7 Nb 0.5 0.5 0	449.541	-81.0608	-1.3951
Hf1 Ta1 Mo2 C4	Full Formula (Hf1 Ta1 Mo2 C4) Reduced Formula: HfTa(MoC2)2 abc : 4.458141 4.458141 4.469725 angles: 90.000000 90.000000 90.000000 pbc : True True True Sites (8) # SP a b c --- ---- ---- ---- ---- 0 C -0 0.5 -0 1 C 0.5 -0 -0 2 C 0 0 0.5 3 C 0.5 0.5 0.5 4 Hf -0 -0 0 5 Mo 0 0.5 0.5 6 Mo 0.5 0 0.5 7 Ta 0.5 0.5 0	488.266	-82.7942	-1.61177
Hf1 Ti1 Mo2 C4	Full Formula (Hf1 Ti1 Mo2 C4) Reduced Formula: HfTi(MoC2)2 abc : 4.434773 4.434773 4.410899 angles: 90.000000 90.000000 90.000000 pbc : True True True Sites (8) # SP a b c --- ---- --- --- --- 0 C 0 0.5 0 1 C 0.5 0 0 2 C 0 0 0.5 3 C 0.5 0.5 0.5 4 Hf 0 0 0 5 Mo 0 0.5 0.5 6 Mo 0.5 0 0.5 7 Ti 0.5 0.5 0	473.866	-79.2212	-1.26015
Hf1 V1 Mo2 C4	Full Formula (Hf1 V1 Mo2 C4) Reduced Formula: HfV(MoC2)2 abc : 4.397046 4.397046 4.394920 angles: 90.000000 90.000000 90.000000 pbc : True True True Sites (8) # SP a b c --- ---- ---- ---- ---- 0 C -0 0.5 -0 1 C 0.5 0 -0 2 C -0 -0 0.5 3 C 0.5 0.5 0.5 4 Hf -0 0 0 5 Mo -0 0.5 0.5 6 Mo 0.5 0 0.5 7 V 0.5 0.5 -0	449.78	-79.1597	-1.28247
Hf1 Mo2 W1 C4	Full Formula (Hf1 Mo2 W1 C4) Reduced Formula: HfMo2WC4 abc : 4.431179 4.431179 4.438051 angles: 90.000000 90.000000 90.000000 pbc : True True True Sites (8) # SP a b c --- ---- ---- ---- ---- 0 C 0 0.5 -0 1 C 0.5 -0 -0 2 C 0 0 0.5 3 C 0.5 0.5 0.5 4 Hf 0 0 -0 5 Mo -0 0.5 0.5 6 Mo 0.5 -0 0.5 7 W 0.5 0.5 0	470.353	-82.3093	-1.36366
Hf1 Zr1 Mo2 C4	Full Formula (Hf1 Zr1 Mo2 C4) Reduced Formula: HfZr(MoC2)2 abc : 4.524894 4.524894 4.486908 angles: 90.000000 90.000000 90.000000 pbc : True True True Sites (8) # SP a b c --- ---- --- ---- ---- 0 C 0 0.5 -0 1 C 0.5 -0 -0 2 C 0 -0 0.5 3 C 0.5 0.5 0.5 4 Hf 0 -0 0 5 Mo 0 0.5 0.5 6 Mo 0.5 -0 0.5 7 Zr 0.5 0.5 -0	463.787	-79.8541	-1.31927
Hf1 Nb2 Mo1 C4	Full Formula (Hf1 Nb2 Mo1 C4) Reduced Formula: HfNb2MoC4 abc : 4.500046 4.487928 4.487928 angles: 90.000000 90.000000 90.000000 pbc : True True True Sites (8) # SP a b c --- ---- --- --- --- 0 C 0 0.5 0 1 C 0.5 0 0 2 C 0 0 0.5 3 C 0.5 0.5 0.5 4 Hf 0 0 0 5 Mo 0 0.5 0.5 6 Nb 0.5 0 0.5 7 Nb 0.5 0.5 0	484.218	-81.8658	-1.65822
Hf1 Ta2 Mo1 C4	Full Formula (Hf1 Ta2 Mo1 C4) Reduced Formula: HfTa2MoC4 abc : 4.495516 4.483949 4.483949 angles: 90.000000 90.000000 90.000000 pbc : True True True Sites (8) # SP a b c --- ---- ---- ---- ---- 0 C -0 0.5 -0 1 C 0.5 -0 -0 2 C 0 -0 0.5 3 C 0.5 0.5 0.5 4 Hf -0 -0 -0 5 Mo 0 0.5 0.5 6 Ta 0.5 0 0.5 7 Ta 0.5 0.5 0	513.674	-85.353	-2.09413
Nb1 Cr2 Mo1 C4	Full Formula (Nb1 Cr2 Mo1 C4) Reduced Formula: NbCr2MoC4 abc : 4.267203 4.284893 4.284893 angles: 90.000000 90.000000 90.000000 pbc : True True True Sites (8) # SP a b c --- ---- ---- --- ---- 0 C -0 0.5 0 1 C 0.5 0 0 2 C -0 0 0.5 3 C 0.5 0.5 0.5 4 Cr 0 0 0 5 Cr -0 0.5 0.5 6 Mo 0.5 0 0.5 7 Nb 0.5 0.5 -0	433.842	-76.2184	-1.5148
Hf1 Ti2 Mo1 C4	Full Formula (Hf1 Ti2 Mo1 C4) Reduced Formula: HfTi2MoC4 abc : 4.425202 4.423523 4.423523 angles: 90.000000 90.000000 90.000000 pbc : True True True Sites (8) # SP a b c --- ---- ---- ---- ---- 0 C 0 0.5 0 1 C 0.5 -0 0 2 C -0 0 0.5 3 C 0.5 0.5 0.5 4 Hf -0 0 -0 5 Mo 0 0.5 0.5 6 Ti 0.5 0 0.5 7 Ti 0.5 0.5 -0	467.599	-77.889	-1.35113
Hf1 V2 Mo1 C4	Full Formula (Hf1 V2 Mo1 C4) Reduced Formula: HfV2MoC4 abc : 4.349658 4.355522 4.355522 angles: 90.000000 90.000000 90.000000 pbc : True True True Sites (8) # SP a b c --- ---- ---- ---- ---- 0 C -0 0.5 0 1 C 0.5 -0 0 2 C -0 0 0.5 3 C 0.5 0.5 0.5 4 Hf 0 0 0 5 Mo 0 0.5 0.5 6 V 0.5 0 0.5 7 V 0.5 0.5 -0	479.436	-77.9382	-1.41728
Hf1 Mo1 W2 C4	Full Formula (Hf1 Mo1 W2 C4) Reduced Formula: HfMo(WC2)2 abc : 4.430095 4.433283 4.433283 angles: 90.000000 90.000000 90.000000 pbc : True True True Sites (8) # SP a b c --- ---- --- ---- ---- 0 C 0 0.5 -0 1 C 0.5 0 0 2 C 0 -0 0.5 3 C 0.5 0.5 0.5 4 Hf 0 -0 -0 5 Mo 0 0.5 0.5 6 W 0.5 -0 0.5 7 W 0.5 0.5 -0	496.406	-84.2585	-1.58231
Hf1 Zr2 Mo1 C4	Full Formula (Hf1 Zr2 Mo1 C4) Reduced Formula: HfZr2MoC4 abc : 4.595465 4.600485 4.600485 angles: 90.000000 90.000000 90.000000 pbc : True True True Sites (8) # SP a b c --- ---- --- --- ---- 0 C 0 0.5 -0 1 C 0.5 0 -0 2 C 0 0 0.5 3 C 0.5 0.5 0.5 4 Hf 0 0 -0 5 Mo 0 0.5 0.5 6 Zr 0.5 0 0.5 7 Zr 0.5 0.5 -0	439.818	-79.534	-1.51675
Hf1 Nb3 C4	Full Formula (Hf1 Nb3 C4) Reduced Formula: HfNb3C4 abc : 4.520195 4.520195 4.520195 angles: 90.000000 90.000000 90.000000 pbc : True True True Sites (8) # SP a b c --- ---- ---- ---- ---- 0 C 0 0.5 0 1 C 0.5 0 0 2 C 0 0 0.5 3 C 0.5 0.5 0.5 4 Hf 0 0 0 5 Nb -0 0.5 0.5 6 Nb 0.5 -0 0.5 7 Nb 0.5 0.5 -0	524.565	-82.7741	-1.93426
Hf1 Ta1 Nb2 C4	Full Formula (Hf1 Ta1 Nb2 C4) Reduced Formula: HfTa(NbC2)2 abc : 4.516647 4.516647 4.517095 angles: 90.000000 90.000000 90.000000 pbc : True True True Sites (8) # SP a b c --- ---- --- ---- --- 0 C 0 0.5 0 1 C 0.5 -0 0 2 C 0 -0 0.5 3 C 0.5 0.5 0.5 4 Hf 0 -0 0 5 Nb 0 0.5 0.5 6 Nb 0.5 -0 0.5 7 Ta 0.5 0.5 0	536.111	-84.5256	-2.1532
Hf1 Ti1 Nb2 C4	Full Formula (Hf1 Ti1 Nb2 C4) Reduced Formula: HfTi(NbC2)2 abc : 4.495313 4.495313 4.486834 angles: 90.000000 90.000000 90.000000 pbc : True True True Sites (8) # SP a b c --- ---- ---- --- ---- 0 C 0 0.5 -0 1 C 0.5 0 -0 2 C 0 0 0.5 3 C 0.5 0.5 0.5 4 Hf -0 0 -0 5 Nb -0 0.5 0.5 6 Nb 0.5 0 0.5 7 Ti 0.5 0.5 -0	476.718	-80.7481	-1.77601
Hf1 Nb2 V1 C4	Full Formula (Hf1 Nb2 V1 C4) Reduced Formula: HfNb2VC4 abc : 4.459301 4.459301 4.462042 angles: 90.000000 90.000000 90.000000 pbc : True True True Sites (8) # SP a b c --- ---- ---- ---- ---- 0 C -0 0.5 -0 1 C 0.5 -0 -0 2 C -0 -0 0.5 3 C 0.5 0.5 0.5 4 Hf 0 -0 -0 5 Nb -0 0.5 0.5 6 Nb 0.5 0 0.5 7 V 0.5 0.5 0	505.556	-80.5715	-1.78394
Hf1 Nb2 W1 C4	Full Formula (Hf1 Nb2 W1 C4) Reduced Formula: HfNb2WC4 abc : 4.482305 4.482305 4.498966 angles: 90.000000 90.000000 90.000000 pbc : True True True Sites (8) # SP a b c --- ---- ---- --- ---- 0 C -0 0.5 -0 1 C 0.5 0 -0 2 C -0 0 0.5 3 C 0.5 0.5 0.5 4 Hf -0 0 0 5 Nb 0 0.5 0.5 6 Nb 0.5 0 0.5 7 W 0.5 0.5 -0	489.302	-83.8906	-1.88632
Nb1 Cr3 C4	Full Formula (Nb1 Cr3 C4) Reduced Formula: NbCr3C4 abc : 4.200891 4.200891 4.200891 angles: 90.000000 90.000000 90.000000 pbc : True True True Sites (8) # SP a b c --- ---- --- ---- ---- 0 C 0 0.5 -0 1 C 0.5 -0 -0 2 C 0 -0 0.5 3 C 0.5 0.5 0.5 4 Cr 0 -0 -0 5 Cr 0 0.5 0.5 6 Cr 0.5 -0 0.5 7 Nb 0.5 0.5 0	399.094	-74.587	-1.72338
Hf1 Zr1 Nb2 C4	Full Formula (Hf1 Zr1 Nb2 C4) Reduced Formula: HfZr(NbC2)2 abc : 4.581376 4.581376 4.562474 angles: 90.000000 90.000000 90.000000 pbc : True True True Sites (8) # SP a b c --- ---- --- ---- ---- 0 C 0 0.5 0 1 C 0.5 -0 0 2 C 0 -0 0.5 3 C 0.5 0.5 0.5 4 Hf 0 -0 0 5 Nb 0 0.5 0.5 6 Nb 0.5 0 0.5 7 Zr 0.5 0.5 -0	461.585	-81.6264	-1.86579
Hf1 Ta2 Nb1 C4	Full Formula (Hf1 Ta2 Nb1 C4) Reduced Formula: HfTa2NbC4 abc : 4.513736 4.513629 4.513629 angles: 90.000000 90.000000 90.000000 pbc : True True True Sites (8) # SP a b c --- ---- ---- ---- ---- 0 C -0 0.5 -0 1 C 0.5 0 0 2 C 0 -0 0.5 3 C 0.5 0.5 0.5 4 Hf -0 -0 -0 5 Nb -0 0.5 0.5 6 Ta 0.5 0 0.5 7 Ta 0.5 0.5 0	542.667	-86.2674	-2.37092
Hf1 Ti2 Nb1 C4	Full Formula (Hf1 Ti2 Nb1 C4) Reduced Formula: HfTi2NbC4 abc : 4.457342 4.463819 4.463819 angles: 90.000000 90.000000 90.000000 pbc : True True True Sites (8) # SP a b c --- ---- ---- --- ---- 0 C 0 0.5 0 1 C 0.5 0 -0 2 C 0 0 0.5 3 C 0.5 0.5 0.5 4 Hf 0 0 0 5 Nb -0 0.5 0.5 6 Ti 0.5 0 0.5 7 Ti 0.5 0.5 0	477.292	-78.6243	-1.60554
Hf1 Nb1 V2 C4	Full Formula (Hf1 Nb1 V2 C4) Reduced Formula: HfNb(VC2)2 abc : 4.372826 4.396892 4.396892 angles: 90.000000 90.000000 90.000000 pbc : True True True Sites (8) # SP a b c --- ---- --- --- --- 0 C 0 0.5 0 1 C 0.5 0 0 2 C 0 0 0.5 3 C 0.5 0.5 0.5 4 Hf 0 0 0 5 Nb 0 0.5 0.5 6 V 0.5 0 0.5 7 V 0.5 0.5 0	492.778	-78.5066	-1.65083
Hf1 Nb1 W2 C4	Full Formula (Hf1 Nb1 W2 C4) Reduced Formula: HfNb(WC2)2 abc : 4.453119 4.459694 4.459694 angles: 90.000000 90.000000 90.000000 pbc : True True True Sites (8) # SP a b c --- ---- ---- ---- ---- 0 C -0 0.5 -0 1 C 0.5 0 -0 2 C 0 -0 0.5 3 C 0.5 0.5 0.5 4 Hf 0 -0 -0 5 Nb -0 0.5 0.5 6 W 0.5 -0 0.5 7 W 0.5 0.5 -0	487.811	-85.0461	-1.84326
Hf1 Zr2 Nb1 C4	Full Formula (Hf1 Zr2 Nb1 C4) Reduced Formula: HfZr2NbC4 abc : 4.631358 4.632392 4.632392 angles: 90.000000 90.000000 90.000000 pbc : True True True Sites (8) # SP a b c --- ---- --- ---- ---- 0 C 0 0.5 -0 1 C 0.5 0 -0 2 C 0 0 0.5 3 C 0.5 0.5 0.5 4 Hf 0 0 -0 5 Nb 0 0.5 0.5 6 Zr 0.5 -0 0.5 7 Zr 0.5 0.5 0	439.681	-80.5705	-1.80882
Ta1 Cr2 Mo1 C4	Full Formula (Ta1 Cr2 Mo1 C4) Reduced Formula: TaCr2MoC4 abc : 4.273248 4.288814 4.288814 angles: 90.000000 90.000000 90.000000 pbc : True True True Sites (8) # SP a b c --- ---- ---- ---- ---- 0 C -0 0.5 -0 1 C 0.5 0 -0 2 C 0 -0 0.5 3 C 0.5 0.5 0.5 4 Cr -0 0 0 5 Cr 0 0.5 0.5 6 Mo 0.5 0 0.5 7 Ta 0.5 0.5 -0	439.733	-77.9851	-1.73563
Hf1 Ta3 C4	Full Formula (Hf1 Ta3 C4) Reduced Formula: HfTa3C4 abc : 4.510778 4.510778 4.510778 angles: 90.000000 90.000000 90.000000 pbc : True True True Sites (8) # SP a b c --- ---- ---- ---- ---- 0 C -0 0.5 -0 1 C 0.5 -0 -0 2 C -0 0 0.5 3 C 0.5 0.5 0.5 4 Hf 0 -0 -0 5 Ta 0 0.5 0.5 6 Ta 0.5 0 0.5 7 Ta 0.5 0.5 0	550.064	-87.9978	-2.58723
Hf1 Ta2 Ti1 C4	Full Formula (Hf1 Ta2 Ti1 C4) Reduced Formula: HfTa2TiC4 abc : 4.489176 4.489176 4.480823 angles: 90.000000 90.000000 90.000000 pbc : True True True Sites (8) # SP a b c --- ---- --- ---- ---- 0 C 0 0.5 0 1 C 0.5 -0 0 2 C 0 -0 0.5 3 C 0.5 0.5 0.5 4 Hf 0 -0 -0 5 Ta 0 0.5 0.5 6 Ta 0.5 -0 0.5 7 Ti 0.5 0.5 -0	508.151	-84.3692	-2.22865
Ti1 Cr2 Mo1 C4	Full Formula (Ti1 Cr2 Mo1 C4) Reduced Formula: TiCr2MoC4 abc : 4.225151 4.224041 4.224041 angles: 90.000000 90.000000 90.000000 pbc : True True True Sites (8) # SP a b c --- ---- ---- ---- ---- 0 C 0 0.5 0 1 C 0.5 -0 0 2 C 0 0 0.5 3 C 0.5 0.5 0.5 4 Cr -0 -0 0 5 Cr 0 0.5 0.5 6 Mo 0.5 -0 0.5 7 Ti 0.5 0.5 -0	434.18	-74.7026	-1.42033
Hf1 Ta2 V1 C4	Full Formula (Hf1 Ta2 V1 C4) Reduced Formula: HfTa2VC4 abc : 4.455775 4.455775 4.458067 angles: 90.000000 90.000000 90.000000 pbc : True True True Sites (8) # SP a b c --- ---- ---- ---- ---- 0 C -0 0.5 -0 1 C 0.5 -0 -0 2 C -0 -0 0.5 3 C 0.5 0.5 0.5 4 Hf -0 -0 0 5 Ta -0 0.5 0.5 6 Ta 0.5 -0 0.5 7 V 0.5 0.5 0	531.581	-84.1573	-2.23216
Hf1 Ta2 W1 C4	Full Formula (Hf1 Ta2 W1 C4) Reduced Formula: HfTa2WC4 abc : 4.478983 4.478983 4.494565 angles: 90.000000 90.000000 90.000000 pbc : True True True Sites (8) # SP a b c --- ---- ---- ---- ---- 0 C 0 0.5 0 1 C 0.5 0 0 2 C 0 -0 0.5 3 C 0.5 0.5 0.5 4 Hf -0 -0 0 5 Ta -0 0.5 0.5 6 Ta 0.5 -0 0.5 7 W 0.5 0.5 -0	511.621	-87.3275	-2.31593
Hf1 Zr1 Ta2 C4	Full Formula (Hf1 Zr1 Ta2 C4) Reduced Formula: HfZr(TaC2)2 abc : 4.571592 4.571592 4.553911 angles: 90.000000 90.000000 90.000000 pbc : True True True Sites (8) # SP a b c --- ---- ---- --- ---- 0 C -0 0.5 0 1 C 0.5 0 0 2 C -0 0 0.5 3 C 0.5 0.5 0.5 4 Hf -0 0 -0 5 Ta -0 0.5 0.5 6 Ta 0.5 0 0.5 7 Zr 0.5 0.5 -0	491.51	-85.1836	-2.31045
Hf1 Ta1 Ti2 C4	Full Formula (Hf1 Ta1 Ti2 C4) Reduced Formula: HfTa(TiC2)2 abc : 4.455289 4.460517 4.460517 angles: 90.000000 90.000000 90.000000 pbc : True True True Sites (8) # SP a b c --- ---- ---- ---- ---- 0 C -0 0.5 0 1 C 0.5 -0 -0 2 C -0 0 0.5 3 C 0.5 0.5 0.5 4 Hf -0 0 0 5 Ta -0 0.5 0.5 6 Ti 0.5 0 0.5 7 Ti 0.5 0.5 0	495.01	-80.4976	-1.83969
Hf1 Ta1 V2 C4	Full Formula (Hf1 Ta1 V2 C4) Reduced Formula: HfTa(VC2)2 abc : 4.376498 4.395443 4.395443 angles: 90.000000 90.000000 90.000000 pbc : True True True Sites (8) # SP a b c --- ---- ---- ---- ---- 0 C -0 0.5 0 1 C 0.5 -0 -0 2 C -0 0 0.5 3 C 0.5 0.5 0.5 4 Hf 0 0 0 5 Ta -0 0.5 0.5 6 V 0.5 -0 0.5 7 V 0.5 0.5 -0	507.7	-80.3491	-1.88114
Hf1 Ta1 W2 C4	Full Formula (Hf1 Ta1 W2 C4) Reduced Formula: HfTa(WC2)2 abc : 4.457691 4.456567 4.456567 angles: 90.000000 90.000000 90.000000 pbc : True True True Sites (8) # SP a b c --- ---- ---- ---- ---- 0 C 0 0.5 -0 1 C 0.5 0 0 2 C 0 -0 0.5 3 C 0.5 0.5 0.5 4 Hf 0 -0 -0 5 Ta -0 0.5 0.5 6 W 0.5 -0 0.5 7 W 0.5 0.5 -0	521.055	-86.7444	-2.05555
Hf1 Zr2 Ta1 C4	Full Formula (Hf1 Zr2 Ta1 C4) Reduced Formula: HfZr2TaC4 abc : 4.625366 4.625383 4.625383 angles: 90.000000 90.000000 90.000000 pbc : True True True Sites (8) # SP a b c --- ---- ---- --- ---- 0 C -0 0.5 -0 1 C 0.5 0 -0 2 C -0 0 0.5 3 C 0.5 0.5 0.5 4 Hf -0 0 -0 5 Ta -0 0.5 0.5 6 Zr 0.5 0 0.5 7 Zr 0.5 0.5 0	459.52	-82.3729	-2.03411
Hf1 Ti3 C4	Full Formula (Hf1 Ti3 C4) Reduced Formula: HfTi3C4 abc : 4.429858 4.429858 4.429858 angles: 90.000000 90.000000 90.000000 pbc : True True True Sites (8) # SP a b c --- ---- ---- ---- ---- 0 C 0 0.5 0 1 C 0.5 0 0 2 C -0 0 0.5 3 C 0.5 0.5 0.5 4 Hf -0 -0 -0 5 Ti -0 0.5 0.5 6 Ti 0.5 -0 0.5 7 Ti 0.5 0.5 -0	432.576	-76.2568	-1.4046
Hf1 Ti2 V1 C4	Full Formula (Hf1 Ti2 V1 C4) Reduced Formula: HfTi2VC4 abc : 4.382978 4.382978 4.397034 angles: 90.000000 90.000000 90.000000 pbc : True True True Sites (8) # SP a b c --- ---- --- ---- ---- 0 C 0 0.5 0 1 C 0.5 -0 0 2 C 0 -0 0.5 3 C 0.5 0.5 0.5 4 Hf 0 -0 -0 5 Ti 0 0.5 0.5 6 Ti 0.5 -0 0.5 7 V 0.5 0.5 0	444.558	-76.3428	-1.44535
Hf1 Ti2 W1 C4	Full Formula (Hf1 Ti2 W1 C4) Reduced Formula: HfTi2WC4 abc : 4.419998 4.419998 4.420908 angles: 90.000000 90.000000 90.000000 pbc : True True True Sites (8) # SP a b c --- ---- ---- --- ---- 0 C -0 0.5 0 1 C 0.5 0 0 2 C 0 0 0.5 3 C 0.5 0.5 0.5 4 Hf 0 0 -0 5 Ti 0 0.5 0.5 6 Ti 0.5 0 0.5 7 W 0.5 0.5 -0	493.067	-80.1797	-1.61246
V1 Cr2 Mo1 C4	Full Formula (V1 Cr2 Mo1 C4) Reduced Formula: VCr2MoC4 abc : 4.187636 4.183745 4.183745 angles: 90.000000 90.000000 90.000000 pbc : True True True Sites (8) # SP a b c --- ---- ---- ---- ---- 0 C -0 0.5 0 1 C 0.5 0 -0 2 C -0 0 0.5 3 C 0.5 0.5 0.5 4 Cr 0 0 -0 5 Cr 0 0.5 0.5 6 Mo 0.5 -0 0.5 7 V 0.5 0.5 -0	456.435	-75.0398	-1.49248
Hf1 Zr1 Ti2 C4	Full Formula (Hf1 Zr1 Ti2 C4) Reduced Formula: HfZr(TiC2)2 abc : 4.532642 4.532642 4.513750 angles: 90.000000 90.000000 90.000000 pbc : True True True Sites (8) # SP a b c --- ---- ---- --- ---- 0 C -0 0.5 -0 1 C 0.5 0 -0 2 C -0 0 0.5 3 C 0.5 0.5 0.5 4 Hf -0 0 -0 5 Ti -0 0.5 0.5 6 Ti 0.5 0 0.5 7 Zr 0.5 0.5 0	416.105	-76.988	-1.476
Hf1 Ti1 V2 C4	Full Formula (Hf1 Ti1 V2 C4) Reduced Formula: HfTi(VC2)2 abc : 4.326917 4.356006 4.356006 angles: 90.000000 90.000000 90.000000 pbc : True True True Sites (8) # SP a b c --- ---- ---- ---- ---- 0 C -0 0.5 0 1 C 0.5 -0 -0 2 C 0 0 0.5 3 C 0.5 0.5 0.5 4 Hf -0 0 0 5 Ti 0 0.5 0.5 6 V 0.5 0 0.5 7 V 0.5 0.5 0	464.164	-76.4911	-1.49389
Hf1 Ti1 W2 C4	Full Formula (Hf1 Ti1 W2 C4) Reduced Formula: HfTi(WC2)2 abc : 4.399192 4.434651 4.434651 angles: 90.000000 90.000000 90.000000 pbc : True True True Sites (8) # SP a b c --- ---- ---- ---- ---- 0 C 0 0.5 -0 1 C 0.5 -0 -0 2 C -0 -0 0.5 3 C 0.5 0.5 0.5 4 Hf -0 -0 0 5 Ti 0 0.5 0.5 6 W 0.5 0 0.5 7 W 0.5 0.5 0	466.591	-83.4082	-1.73353
Hf1 Zr2 Ti1 C4	Full Formula (Hf1 Zr2 Ti1 C4) Reduced Formula: HfZr2TiC4 abc : 4.612619 4.615227 4.615227 angles: 90.000000 90.000000 90.000000 pbc : True True True Sites (8) # SP a b c --- ---- ---- ---- --- 0 C -0 0.5 0 1 C 0.5 -0 0 2 C 0 -0 0.5 3 C 0.5 0.5 0.5 4 Hf 0 -0 0 5 Ti 0 0.5 0.5 6 Zr 0.5 0 0.5 7 Zr 0.5 0.5 0	409.789	-78.0776	-1.5922
Hf1 V3 C4	Full Formula (Hf1 V3 C4) Reduced Formula: HfV3C4 abc : 4.305093 4.305093 4.305093 angles: 90.000000 90.000000 90.000000 pbc : True True True Sites (8) # SP a b c --- ---- ---- ---- ---- 0 C 0 0.5 -0 1 C 0.5 -0 0 2 C -0 0 0.5 3 C 0.5 0.5 0.5 4 Hf 0 0 0 5 V -0 0.5 0.5 6 V 0.5 -0 0.5 7 V 0.5 0.5 -0	466.599	-76.7069	-1.55087
Hf1 V2 W1 C4	Full Formula (Hf1 V2 W1 C4) Reduced Formula: HfV2WC4 abc : 4.354774 4.354774 4.349442 angles: 90.000000 90.000000 90.000000 pbc : True True True Sites (8) # SP a b c --- ---- ---- --- ---- 0 C -0 0.5 0 1 C 0.5 0 0 2 C -0 0 0.5 3 C 0.5 0.5 0.5 4 Hf -0 0 -0 5 V -0 0.5 0.5 6 V 0.5 0 0.5 7 W 0.5 0.5 -0	480.733	-80.1299	-1.66624
Hf1 Zr1 V2 C4	Full Formula (Hf1 Zr1 V2 C4) Reduced Formula: HfZr(VC2)2 abc : 4.470519 4.470519 4.407165 angles: 90.000000 90.000000 90.000000 pbc : True True True Sites (8) # SP a b c --- ---- --- ---- ---- 0 C 0 0.5 0 1 C 0.5 -0 0 2 C 0 -0 0.5 3 C 0.5 0.5 0.5 4 Hf 0 -0 -0 5 V 0 0.5 0.5 6 V 0.5 -0 0.5 7 Zr 0.5 0.5 -0	435.518	-76.8273	-1.51591
Hf1 V1 W2 C4	Full Formula (Hf1 V1 W2 C4) Reduced Formula: HfV(WC2)2 abc : 4.386307 4.397848 4.397848 angles: 90.000000 90.000000 90.000000 pbc : True True True Sites (8) # SP a b c --- ---- --- ---- ---- 0 C 0 0.5 -0 1 C 0.5 0 0 2 C 0 -0 0.5 3 C 0.5 0.5 0.5 4 Hf 0 -0 -0 5 V 0 0.5 0.5 6 W 0.5 -0 0.5 7 W 0.5 0.5 -0	494.091	-83.2859	-1.74824
Hf1 Zr2 V1 C4	Full Formula (Hf1 Zr2 V1 C4) Reduced Formula: HfZr2VC4 abc : 4.573990 4.582267 4.582267 angles: 90.000000 90.000000 90.000000 pbc : True True True Sites (8) # SP a b c --- ---- --- ---- ---- 0 C 0 0.5 0 1 C 0.5 -0 0 2 C 0 -0 0.5 3 C 0.5 0.5 0.5 4 Hf 0 -0 0 5 V 0 0.5 0.5 6 Zr 0.5 -0 0.5 7 Zr 0.5 0.5 -0	404.595	-77.7894	-1.58618
Hf1 W3 C4	Full Formula (Hf1 W3 C4) Reduced Formula: HfW3C4 abc : 4.431213 4.431213 4.431213 angles: 90.000000 90.000000 90.000000 pbc : True True True Sites (8) # SP a b c --- ---- ---- ---- ---- 0 C -0 0.5 -0 1 C 0.5 -0 -0 2 C -0 0 0.5 3 C 0.5 0.5 0.5 4 Hf -0 -0 0 5 W 0 0.5 0.5 6 W 0.5 0 0.5 7 W 0.5 0.5 0	518.177	-86.1558	-1.79448
Cr2 Mo1 W1 C4	Full Formula (Cr2 Mo1 W1 C4) Reduced Formula: Cr2MoWC4 abc : 4.240330 4.256698 4.256698 angles: 90.000000 90.000000 90.000000 pbc : True True True Sites (8) # SP a b c --- ---- --- ---- ---- 0 C 0 0.5 -0 1 C 0.5 0 0 2 C 0 -0 0.5 3 C 0.5 0.5 0.5 4 Cr 0 0 -0 5 Cr 0 0.5 0.5 6 Mo 0.5 -0 0.5 7 W 0.5 0.5 0	427.989	-77.8456	-1.53069
Hf1 Zr1 W2 C4	Full Formula (Hf1 Zr1 W2 C4) Reduced Formula: HfZr(WC2)2 abc : 4.521109 4.521109 4.471862 angles: 90.000000 90.000000 90.000000 pbc : True True True Sites (8) # SP a b c --- ---- ---- --- ---- 0 C -0 0.5 -0 1 C 0.5 0 -0 2 C -0 0 0.5 3 C 0.5 0.5 0.5 4 Hf -0 0 0 5 W -0 0.5 0.5 6 W 0.5 0 0.5 7 Zr 0.5 0.5 0	479.028	-83.9327	-1.77908
Hf1 Zr2 W1 C4	Full Formula (Hf1 Zr2 W1 C4) Reduced Formula: HfZr2WC4 abc : 4.589054 4.592578 4.592578 angles: 90.000000 90.000000 90.000000 pbc : True True True Sites (8) # SP a b c --- ---- ---- ---- ---- 0 C -0 0.5 0 1 C 0.5 -0 0 2 C -0 -0 0.5 3 C 0.5 0.5 0.5 4 Hf -0 -0 0 5 W -0 0.5 0.5 6 Zr 0.5 0 0.5 7 Zr 0.5 0.5 -0	457.887	-81.701	-1.76263
Hf1 Zr3 C4	Full Formula (Hf1 Zr3 C4) Reduced Formula: HfZr3C4 abc : 4.693189 4.693189 4.693189 angles: 90.000000 90.000000 90.000000 pbc : True True True Sites (8) # SP a b c --- ---- --- ---- --- 0 C 0 0.5 0 1 C 0.5 -0 0 2 C 0 -0 0.5 3 C 0.5 0.5 0.5 4 Hf 0 -0 0 5 Zr 0 0.5 0.5 6 Zr 0.5 0 0.5 7 Zr 0.5 0.5 0	409.598	-79.4637	-1.74546
Nb1 Mo3 C4	Full Formula (Nb1 Mo3 C4) Reduced Formula: NbMo3C4 abc : 4.400178 4.400178 4.400178 angles: 90.000000 90.000000 90.000000 pbc : True True True Sites (8) # SP a b c --- ---- ---- ---- ---- 0 C -0 0.5 -0 1 C 0.5 0 -0 2 C -0 0 0.5 3 C 0.5 0.5 0.5 4 Mo 0 -0 0 5 Mo -0 0.5 0.5 6 Mo 0.5 -0 0.5 7 Nb 0.5 0.5 0	417.352	-79.7886	-1.13608
Ta1 Mo3 C4	Full Formula (Ta1 Mo3 C4) Reduced Formula: TaMo3C4 abc : 4.401422 4.401422 4.401422 angles: 90.000000 90.000000 90.000000 pbc : True True True Sites (8) # SP a b c --- ---- ---- --- ---- 0 C -0 0.5 -0 1 C 0.5 0 -0 2 C 0 0 0.5 3 C 0.5 0.5 0.5 4 Mo -0 0 0 5 Mo 0 0.5 0.5 6 Mo 0.5 0 0.5 7 Ta 0.5 0.5 -0	426.957	-81.478	-1.34724
Ti1 Mo3 C4	Full Formula (Ti1 Mo3 C4) Reduced Formula: TiMo3C4 abc : 4.358266 4.358266 4.358266 angles: 90.000000 90.000000 90.000000 pbc : True True True Sites (8) # SP a b c --- ---- ---- ---- ---- 0 C -0 0.5 0 1 C 0.5 0 -0 2 C -0 0 0.5 3 C 0.5 0.5 0.5 4 Mo -0 0 -0 5 Mo 0 0.5 0.5 6 Mo 0.5 -0 0.5 7 Ti 0.5 0.5 0	473.698	-78.2591	-1.03989
V1 Mo3 C4	Full Formula (V1 Mo3 C4) Reduced Formula: VMo3C4 abc : 4.329342 4.329342 4.329342 angles: 90.000000 90.000000 90.000000 pbc : True True True Sites (8) # SP a b c --- ---- ---- ---- ---- 0 C -0 0.5 0 1 C 0.5 -0 0 2 C -0 -0 0.5 3 C 0.5 0.5 0.5 4 Mo -0 -0 -0 5 Mo 0 0.5 0.5 6 Mo 0.5 -0 0.5 7 V 0.5 0.5 0	444.284	-78.1889	-1.06112
Mo3 W1 C4	Full Formula (Mo3 W1 C4) Reduced Formula: Mo3WC4 abc : 4.375523 4.375523 4.375523 angles: 90.000000 90.000000 90.000000 pbc : True True True Sites (8) # SP a b c --- ---- ---- ---- ---- 0 C 0 0.5 -0 1 C 0.5 0 -0 2 C 0 0 0.5 3 C 0.5 0.5 0.5 4 Mo 0 -0 0 5 Mo -0 0.5 0.5 6 Mo 0.5 -0 0.5 7 W 0.5 0.5 0	426.343	-80.9175	-1.08969
Zr1 Mo3 C4	Full Formula (Zr1 Mo3 C4) Reduced Formula: ZrMo3C4 abc : 4.445555 4.445555 4.445555 angles: 90.000000 90.000000 90.000000 pbc : True True True Sites (8) # SP a b c --- ---- ---- ---- ---- 0 C 0 0.5 -0 1 C 0.5 -0 -0 2 C 0 -0 0.5 3 C 0.5 0.5 0.5 4 Mo 0 -0 -0 5 Mo -0 0.5 0.5 6 Mo 0.5 -0 0.5 7 Zr 0.5 0.5 0	434.838	-78.6118	-1.06397
Zr1 Cr2 Mo1 C4	Full Formula (Zr1 Cr2 Mo1 C4) Reduced Formula: ZrCr2MoC4 abc : 4.315091 4.340622 4.340622 angles: 90.000000 90.000000 90.000000 pbc : True True True Sites (8) # SP a b c --- ---- ---- --- ---- 0 C -0 0.5 0 1 C 0.5 0 0 2 C -0 0 0.5 3 C 0.5 0.5 0.5 4 Cr -0 0 0 5 Cr -0 0.5 0.5 6 Mo 0.5 0 0.5 7 Zr 0.5 0.5 -0	389.41	-74.4485	-1.36856
Nb2 Mo2 C4	Full Formula (Nb2 Mo2 C4) Reduced Formula: NbMoC2 abc : 4.428277 4.425241 4.425241 angles: 90.000000 90.000000 90.000000 pbc : True True True Sites (8) # SP a b c --- ---- ---- ---- ---- 0 C -0 0.5 -0 1 C 0.5 -0 -0 2 C 0 -0 0.5 3 C 0.5 0.5 0.5 4 Mo 0 -0 -0 5 Mo 0 0.5 0.5 6 Nb 0.5 0 0.5 7 Nb 0.5 0.5 0	484.39	-80.5882	-1.39853
Ta1 Nb1 Mo2 C4	Full Formula (Ta1 Nb1 Mo2 C4) Reduced Formula: TaNb(MoC2)2 abc : 4.429915 4.424547 4.424547 angles: 90.000000 90.000000 90.000000 pbc : True True True Sites (8) # SP a b c --- ---- ---- ---- ---- 0 C 0 0.5 -0 1 C 0.5 0 -0 2 C -0 -0 0.5 3 C 0.5 0.5 0.5 4 Mo -0 -0 -0 5 Mo -0 0.5 0.5 6 Nb 0.5 0 0.5 7 Ta 0.5 0.5 0	470.985	-82.2856	-1.61069
Ti1 Nb1 Mo2 C4	Full Formula (Ti1 Nb1 Mo2 C4) Reduced Formula: TiNb(MoC2)2 abc : 4.390548 4.385564 4.385564 angles: 90.000000 90.000000 90.000000 pbc : True True True Sites (8) # SP a b c --- ---- ---- ---- --- 0 C -0 0.5 0 1 C 0.5 -0 0 2 C -0 -0 0.5 3 C 0.5 0.5 0.5 4 Mo -0 -0 0 5 Mo -0 0.5 0.5 6 Nb 0.5 0 0.5 7 Ti 0.5 0.5 0	450.237	-78.903	-1.28288
Nb1 V1 Mo2 C4	Full Formula (Nb1 V1 Mo2 C4) Reduced Formula: NbV(MoC2)2 abc : 4.360545 4.355313 4.355313 angles: 90.000000 90.000000 90.000000 pbc : True True True Sites (8) # SP a b c --- ---- ---- ---- ---- 0 C 0 0.5 0 1 C 0.5 0 0 2 C -0 0 0.5 3 C 0.5 0.5 0.5 4 Mo 0 0 0 5 Mo 0 0.5 0.5 6 Nb 0.5 -0 0.5 7 V 0.5 0.5 -0	493.76	-78.8649	-1.30812
Nb1 Mo2 W1 C4	Full Formula (Nb1 Mo2 W1 C4) Reduced Formula: NbMo2WC4 abc : 4.406333 4.396527 4.396527 angles: 90.000000 90.000000 90.000000 pbc : True True True Sites (8) # SP a b c --- ---- ---- ---- ---- 0 C -0 0.5 -0 1 C 0.5 0 -0 2 C -0 0 0.5 3 C 0.5 0.5 0.5 4 Mo -0 0 -0 5 Mo -0 0.5 0.5 6 Nb 0.5 -0 0.5 7 W 0.5 0.5 -0	427.864	-81.7208	-1.3526
Zr1 Nb1 Mo2 C4	Full Formula (Zr1 Nb1 Mo2 C4) Reduced Formula: ZrNb(MoC2)2 abc : 4.471854 4.475550 4.475550 angles: 90.000000 90.000000 90.000000 pbc : True True True Sites (8) # SP a b c --- ---- ---- ---- ---- 0 C 0 0.5 0 1 C 0.5 0 0 2 C -0 0 0.5 3 C 0.5 0.5 0.5 4 Mo -0 0 0 5 Mo -0 0.5 0.5 6 Nb 0.5 -0 0.5 7 Zr 0.5 0.5 -0	434.28	-79.3673	-1.32091
Nb2 Cr2 C4	Full Formula (Nb2 Cr2 C4) Reduced Formula: NbCrC2 abc : 4.299208 4.319625 4.319625 angles: 90.000000 90.000000 90.000000 pbc : True True True Sites (8) # SP a b c --- ---- ---- ---- ---- 0 C 0 0.5 0 1 C 0.5 0 0 2 C 0 0 0.5 3 C 0.5 0.5 0.5 4 Cr -0 0 0 5 Cr -0 0.5 0.5 6 Nb 0.5 -0 0.5 7 Nb 0.5 0.5 -0	429.506	-76.6939	-1.73673
Ta2 Mo2 C4	Full Formula (Ta2 Mo2 C4) Reduced Formula: TaMoC2 abc : 4.432763 4.423477 4.423477 angles: 90.000000 90.000000 90.000000 pbc : True True True Sites (8) # SP a b c --- ---- ---- ---- ---- 0 C -0 0.5 -0 1 C 0.5 -0 0 2 C 0 0 0.5 3 C 0.5 0.5 0.5 4 Mo 0 0 -0 5 Mo -0 0.5 0.5 6 Ta 0.5 0 0.5 7 Ta 0.5 0.5 -0	469.444	-83.9851	-1.82314
Ta1 Ti1 Mo2 C4	Full Formula (Ta1 Ti1 Mo2 C4) Reduced Formula: TaTi(MoC2)2 abc : 4.397406 4.383700 4.383700 angles: 90.000000 90.000000 90.000000 pbc : True True True Sites (8) # SP a b c --- ---- ---- --- ---- 0 C 0 0.5 -0 1 C 0.5 0 -0 2 C 0 0 0.5 3 C 0.5 0.5 0.5 4 Mo 0 0 0 5 Mo -0 0.5 0.5 6 Ta 0.5 0 0.5 7 Ti 0.5 0.5 0	474.542	-80.6581	-1.50226
Ta1 V1 Mo2 C4	Full Formula (Ta1 V1 Mo2 C4) Reduced Formula: TaV(MoC2)2 abc : 4.363706 4.356528 4.356528 angles: 90.000000 90.000000 90.000000 pbc : True True True Sites (8) # SP a b c --- ---- ---- ---- ---- 0 C -0 0.5 0 1 C 0.5 -0 -0 2 C -0 -0 0.5 3 C 0.5 0.5 0.5 4 Mo -0 -0 0 5 Mo 0 0.5 0.5 6 Ta 0.5 -0 0.5 7 V 0.5 0.5 -0	506.01	-80.5915	-1.52394
Ta1 Mo2 W1 C4	Full Formula (Ta1 Mo2 W1 C4) Reduced Formula: TaMo2WC4 abc : 4.411644 4.395844 4.395844 angles: 90.000000 90.000000 90.000000 pbc : True True True Sites (8) # SP a b c --- ---- ---- ---- ---- 0 C 0 0.5 0 1 C 0.5 0 -0 2 C -0 -0 0.5 3 C 0.5 0.5 0.5 4 Mo -0 0 0 5 Mo 0 0.5 0.5 6 Ta 0.5 0 0.5 7 W 0.5 0.5 0	419.725	-83.4053	-1.56317
Zr1 Ta1 Mo2 C4	Full Formula (Zr1 Ta1 Mo2 C4) Reduced Formula: ZrTa(MoC2)2 abc : 4.477385 4.471236 4.471236 angles: 90.000000 90.000000 90.000000 pbc : True True True Sites (8) # SP a b c --- ---- --- ---- ---- 0 C 0 0.5 0 1 C 0.5 0 0 2 C 0 0 0.5 3 C 0.5 0.5 0.5 4 Mo 0 0 0 5 Mo 0 0.5 0.5 6 Ta 0.5 -0 0.5 7 Zr 0.5 0.5 -0	468.761	-81.0789	-1.53486
Ti2 Mo2 C4	Full Formula (Ti2 Mo2 C4) Reduced Formula: TiMoC2 abc : 4.325188 4.354916 4.354916 angles: 90.000000 90.000000 90.000000 pbc : True True True Sites (8) # SP a b c --- ---- ---- --- --- 0 C 0 0.5 0 1 C 0.5 0 0 2 C 0 0 0.5 3 C 0.5 0.5 0.5 4 Mo -0 0 0 5 Mo 0 0.5 0.5 6 Ti 0.5 0 0.5 7 Ti 0.5 0.5 0	502.656	-77.2035	-1.16543
Ti1 V1 Mo2 C4	Full Formula (Ti1 V1 Mo2 C4) Reduced Formula: TiV(MoC2)2 abc : 4.301608 4.316768 4.316768 angles: 90.000000 90.000000 90.000000 pbc : True True True Sites (8) # SP a b c --- ---- ---- ---- ---- 0 C 0 0.5 -0 1 C 0.5 -0 0 2 C -0 -0 0.5 3 C 0.5 0.5 0.5 4 Mo 0 0 0 5 Mo 0 0.5 0.5 6 Ti 0.5 0 0.5 7 V 0.5 0.5 -0	471.486	-77.2698	-1.20372
Ti1 Mo2 W1 C4	Full Formula (Ti1 Mo2 W1 C4) Reduced Formula: TiMo2WC4 abc : 4.363882 4.355815 4.355815 angles: 90.000000 90.000000 90.000000 pbc : True True True Sites (8) # SP a b c --- ---- ---- --- ---- 0 C 0 0.5 -0 1 C 0.5 0 0 2 C -0 0 0.5 3 C 0.5 0.5 0.5 4 Mo 0 0 -0 5 Mo 0 0.5 0.5 6 Ti 0.5 0 0.5 7 W 0.5 0.5 -0	494.543	-80.2752	-1.2669
Zr1 Ti1 Mo2 C4	Full Formula (Zr1 Ti1 Mo2 C4) Reduced Formula: ZrTi(MoC2)2 abc : 4.421101 4.446852 4.446852 angles: 90.000000 90.000000 90.000000 pbc : True True True Sites (8) # SP a b c --- ---- ---- ---- ---- 0 C 0 0.5 -0 1 C 0.5 -0 0 2 C -0 -0 0.5 3 C 0.5 0.5 0.5 4 Mo -0 -0 -0 5 Mo -0 0.5 0.5 6 Ti 0.5 -0 0.5 7 Zr 0.5 0.5 0	453.358	-77.4991	-1.18239
V2 Mo2 C4	Full Formula (V2 Mo2 C4) Reduced Formula: VMoC2 abc : 4.270123 4.282120 4.282120 angles: 90.000000 90.000000 90.000000 pbc : True True True Sites (8) # SP a b c --- ---- ---- ---- ---- 0 C -0 0.5 0 1 C 0.5 0 0 2 C 0 -0 0.5 3 C 0.5 0.5 0.5 4 Mo -0 0 0 5 Mo -0 0.5 0.5 6 V 0.5 0 0.5 7 V 0.5 0.5 -0	501.287	-77.3703	-1.24629
V1 Mo2 W1 C4	Full Formula (V1 Mo2 W1 C4) Reduced Formula: VMo2WC4 abc : 4.334612 4.328545 4.328545 angles: 90.000000 90.000000 90.000000 pbc : True True True Sites (8) # SP a b c --- ---- ---- ---- ---- 0 C -0 0.5 0 1 C 0.5 -0 -0 2 C 0 0 0.5 3 C 0.5 0.5 0.5 4 Mo -0 0 0 5 Mo 0 0.5 0.5 6 V 0.5 0 0.5 7 W 0.5 0.5 -0	457.232	-80.1949	-1.28686
Zr1 V1 Mo2 C4	Full Formula (Zr1 V1 Mo2 C4) Reduced Formula: ZrV(MoC2)2 abc : 4.405644 4.407607 4.407607 angles: 90.000000 90.000000 90.000000 pbc : True True True Sites (8) # SP a b c --- ---- --- ---- ---- 0 C 0 0.5 -0 1 C 0.5 -0 0 2 C 0 -0 0.5 3 C 0.5 0.5 0.5 4 Mo 0 -0 0 5 Mo 0 0.5 0.5 6 V 0.5 -0 0.5 7 Zr 0.5 0.5 -0	442.358	-77.4046	-1.20057
Mo2 W2 C4	Full Formula (Mo2 W2 C4) Reduced Formula: MoWC2 abc : 4.381806 4.373244 4.373244 angles: 90.000000 90.000000 90.000000 pbc : True True True Sites (8) # SP a b c --- ---- ---- ---- ---- 0 C -0 0.5 -0 1 C 0.5 -0 -0 2 C 0 0 0.5 3 C 0.5 0.5 0.5 4 Mo -0 0 -0 5 Mo -0 0.5 0.5 6 W 0.5 0 0.5 7 W 0.5 0.5 0	459.847	-82.8055	-1.30069
Zr1 Mo2 W1 C4	Full Formula (Zr1 Mo2 W1 C4) Reduced Formula: ZrMo2WC4 abc : 4.447381 4.442170 4.442170 angles: 90.000000 90.000000 90.000000 pbc : True True True Sites (8) # SP a b c --- ---- ---- ---- ---- 0 C -0 0.5 -0 1 C 0.5 0 0 2 C -0 0 0.5 3 C 0.5 0.5 0.5 4 Mo -0 0 -0 5 Mo -0 0.5 0.5 6 W 0.5 -0 0.5 7 Zr 0.5 0.5 0	455.481	-80.5916	-1.28645
Zr2 Mo2 C4	Full Formula (Zr2 Mo2 C4) Reduced Formula: ZrMoC2 abc : 4.496029 4.539379 4.539379 angles: 90.000000 90.000000 90.000000 pbc : True True True Sites (8) # SP a b c --- ---- ---- ---- ---- 0 C -0 0.5 0 1 C 0.5 0 0 2 C 0 -0 0.5 3 C 0.5 0.5 0.5 4 Mo -0 -0 0 5 Mo -0 0.5 0.5 6 Zr 0.5 0 0.5 7 Zr 0.5 0.5 -0	445.628	-78.1788	-1.24735
Nb3 Mo1 C4	Full Formula (Nb3 Mo1 C4) Reduced Formula: Nb3MoC4 abc : 4.453824 4.453824 4.453824 angles: 90.000000 90.000000 90.000000 pbc : True True True Sites (8) # SP a b c --- ---- ---- ---- ---- 0 C -0 0.5 -0 1 C 0.5 -0 -0 2 C -0 -0 0.5 3 C 0.5 0.5 0.5 4 Mo -0 -0 -0 5 Nb 0 0.5 0.5 6 Nb 0.5 0 0.5 7 Nb 0.5 0.5 0	505.798	-81.3774	-1.65967
Ta1 Nb1 Cr2 C4	Full Formula (Ta1 Nb1 Cr2 C4) Reduced Formula: TaNb(CrC2)2 abc : 4.306854 4.320756 4.320756 angles: 90.000000 90.000000 90.000000 pbc : True True True Sites (8) # SP a b c --- ---- ---- ---- ---- 0 C -0 0.5 -0 1 C 0.5 -0 -0 2 C 0 -0 0.5 3 C 0.5 0.5 0.5 4 Cr 0 -0 -0 5 Cr -0 0.5 0.5 6 Nb 0.5 0 0.5 7 Ta 0.5 0.5 -0	454.198	-78.4876	-1.96095
Ta1 Nb2 Mo1 C4	Full Formula (Ta1 Nb2 Mo1 C4) Reduced Formula: TaNb2MoC4 abc : 4.454002 4.454002 4.450146 angles: 90.000000 90.000000 90.000000 pbc : True True True Sites (8) # SP a b c --- ---- --- --- ---- 0 C 0 0.5 -0 1 C 0.5 0 -0 2 C 0 0 0.5 3 C 0.5 0.5 0.5 4 Mo 0 0 -0 5 Nb 0 0.5 0.5 6 Nb 0.5 0 0.5 7 Ta 0.5 0.5 -0	523.131	-83.0917	-1.87397
Ti1 Nb2 Mo1 C4	Full Formula (Ti1 Nb2 Mo1 C4) Reduced Formula: TiNb2MoC4 abc : 4.415816 4.415816 4.422680 angles: 90.000000 90.000000 90.000000 pbc : True True True Sites (8) # SP a b c --- ---- ---- --- ---- 0 C -0 0.5 -0 1 C 0.5 0 -0 2 C -0 0 0.5 3 C 0.5 0.5 0.5 4 Mo -0 0 -0 5 Nb -0 0.5 0.5 6 Nb 0.5 0 0.5 7 Ti 0.5 0.5 -0	475.333	-79.5888	-1.53109
Nb2 V1 Mo1 C4	Full Formula (Nb2 V1 Mo1 C4) Reduced Formula: Nb2VMoC4 abc : 4.387342 4.387342 4.385914 angles: 90.000000 90.000000 90.000000 pbc : True True True Sites (8) # SP a b c --- ---- --- ---- ---- 0 C 0 0.5 -0 1 C 0.5 -0 -0 2 C 0 -0 0.5 3 C 0.5 0.5 0.5 4 Mo 0 -0 -0 5 Nb 0 0.5 0.5 6 Nb 0.5 -0 0.5 7 V 0.5 0.5 -0	478.396	-79.5143	-1.55179
Nb2 Mo1 W1 C4	Full Formula (Nb2 Mo1 W1 C4) Reduced Formula: Nb2MoWC4 abc : 4.425439 4.425439 4.422459 angles: 90.000000 90.000000 90.000000 pbc : True True True Sites (8) # SP a b c --- ---- ---- --- --- 0 C -0 0.5 0 1 C 0.5 0 0 2 C -0 0 0.5 3 C 0.5 0.5 0.5 4 Mo -0 0 0 5 Nb 0 0.5 0.5 6 Nb 0.5 0 0.5 7 W 0.5 0.5 0	500.875	-82.5471	-1.61839
Zr1 Nb2 Mo1 C4	Full Formula (Zr1 Nb2 Mo1 C4) Reduced Formula: ZrNb2MoC4 abc : 4.499164 4.499164 4.514679 angles: 90.000000 90.000000 90.000000 pbc : True True True Sites (8) # SP a b c --- ---- --- ---- ---- 0 C 0 0.5 0 1 C 0.5 -0 0 2 C 0 -0 0.5 3 C 0.5 0.5 0.5 4 Mo 0 -0 -0 5 Nb 0 0.5 0.5 6 Nb 0.5 -0 0.5 7 Zr 0.5 0.5 0	459.338	-80.173	-1.58412
Ta2 Nb1 Mo1 C4	Full Formula (Ta2 Nb1 Mo1 C4) Reduced Formula: Ta2NbMoC4 abc : 4.454753 4.450430 4.450430 angles: 90.000000 90.000000 90.000000 pbc : True True True Sites (8) # SP a b c --- ---- ---- ---- ---- 0 C 0 0.5 -0 1 C 0.5 -0 -0 2 C 0 -0 0.5 3 C 0.5 0.5 0.5 4 Mo 0 -0 -0 5 Nb -0 0.5 0.5 6 Ta 0.5 0 0.5 7 Ta 0.5 0.5 0	532.653	-84.8072	-2.0884
Ti2 Nb1 Mo1 C4	Full Formula (Ti2 Nb1 Mo1 C4) Reduced Formula: Ti2NbMoC4 abc : 4.367909 4.383674 4.383674 angles: 90.000000 90.000000 90.000000 pbc : True True True Sites (8) # SP a b c --- ---- ---- ---- ---- 0 C 0 0.5 -0 1 C 0.5 0 -0 2 C 0 0 0.5 3 C 0.5 0.5 0.5 4 Mo -0 -0 -0 5 Nb -0 0.5 0.5 6 Ti 0.5 0 0.5 7 Ti 0.5 0.5 -0	507.031	-77.7792	-1.3999
Nb1 V2 Mo1 C4	Full Formula (Nb1 V2 Mo1 C4) Reduced Formula: NbV2MoC4 abc : 4.297724 4.315828 4.315828 angles: 90.000000 90.000000 90.000000 pbc : True True True Sites (8) # SP a b c --- ---- ---- ---- ---- 0 C 0 0.5 -0 1 C 0.5 0 0 2 C 0 0 0.5 3 C 0.5 0.5 0.5 4 Mo 0 -0 -0 5 Nb -0 0.5 0.5 6 V 0.5 0 0.5 7 V 0.5 0.5 0	454.336	-77.887	-1.47337
Nb1 Mo1 W2 C4	Full Formula (Nb1 Mo1 W2 C4) Reduced Formula: NbMo(WC2)2 abc : 4.397255 4.400718 4.400718 angles: 90.000000 90.000000 90.000000 pbc : True True True Sites (8) # SP a b c --- ---- ---- ---- ---- 0 C 0 0.5 -0 1 C 0.5 -0 -0 2 C -0 0 0.5 3 C 0.5 0.5 0.5 4 Mo -0 0 0 5 Nb 0 0.5 0.5 6 W 0.5 -0 0.5 7 W 0.5 0.5 0	428.595	-83.6165	-1.56457
Ti1 Nb1 Cr2 C4	Full Formula (Ti1 Nb1 Cr2 C4) Reduced Formula: TiNb(CrC2)2 abc : 4.250416 4.265693 4.265693 angles: 90.000000 90.000000 90.000000 pbc : True True True Sites (8) # SP a b c --- ---- ---- ---- ---- 0 C -0 0.5 0 1 C 0.5 0 -0 2 C -0 0 0.5 3 C 0.5 0.5 0.5 4 Cr 0 0 0 5 Cr 0 0.5 0.5 6 Nb 0.5 -0 0.5 7 Ti 0.5 0.5 0	448.198	-74.9766	-1.61707
Zr2 Nb1 Mo1 C4	Full Formula (Zr2 Nb1 Mo1 C4) Reduced Formula: Zr2NbMoC4 abc : 4.537314 4.567515 4.567515 angles: 90.000000 90.000000 90.000000 pbc : True True True Sites (8) # SP a b c --- ---- ---- ---- ---- 0 C -0 0.5 0 1 C 0.5 0 0 2 C -0 0 0.5 3 C 0.5 0.5 0.5 4 Mo 0 0 0 5 Nb 0 0.5 0.5 6 Zr 0.5 -0 0.5 7 Zr 0.5 0.5 -0	435.194	-79.0079	-1.51349
Nb1 V1 Cr2 C4	Full Formula (Nb1 V1 Cr2 C4) Reduced Formula: NbV(CrC2)2 abc : 4.221200 4.218532 4.218532 angles: 90.000000 90.000000 90.000000 pbc : True True True Sites (8) # SP a b c --- ---- ---- ---- ---- 0 C -0 0.5 0 1 C 0.5 -0 -0 2 C -0 0 0.5 3 C 0.5 0.5 0.5 4 Cr -0 0 0 5 Cr -0 0.5 0.5 6 Nb 0.5 0 0.5 7 V 0.5 0.5 0	433.361	-75.323	-1.69038
Ta3 Mo1 C4	Full Formula (Ta3 Mo1 C4) Reduced Formula: Ta3MoC4 abc : 4.450955 4.450955 4.450955 angles: 90.000000 90.000000 90.000000 pbc : True True True Sites (8) # SP a b c --- ---- ---- ---- ---- 0 C -0 0.5 -0 1 C 0.5 -0 -0 2 C -0 -0 0.5 3 C 0.5 0.5 0.5 4 Mo -0 -0 -0 5 Ta 0 0.5 0.5 6 Ta 0.5 0 0.5 7 Ta 0.5 0.5 -0	536.641	-86.5202	-2.30253
Ta2 Ti1 Mo1 C4	Full Formula (Ta2 Ti1 Mo1 C4) Reduced Formula: Ta2TiMoC4 abc : 4.414449 4.414449 4.423569 angles: 90.000000 90.000000 90.000000 pbc : True True True Sites (8) # SP a b c --- ---- ---- ---- ---- 0 C 0 0.5 0 1 C 0.5 -0 0 2 C 0 -0 0.5 3 C 0.5 0.5 0.5 4 Mo 0 -0 -0 5 Ta -0 0.5 0.5 6 Ta 0.5 -0 0.5 7 Ti 0.5 0.5 -0	501.208	-83.1158	-1.97197
Ta2 V1 Mo1 C4	Full Formula (Ta2 V1 Mo1 C4) Reduced Formula: Ta2VMoC4 abc : 4.386658 4.386658 4.391556 angles: 90.000000 90.000000 90.000000 pbc : True True True Sites (8) # SP a b c --- ---- ---- ---- ---- 0 C -0 0.5 0 1 C 0.5 -0 0 2 C -0 -0 0.5 3 C 0.5 0.5 0.5 4 Mo -0 -0 -0 5 Ta -0 0.5 0.5 6 Ta 0.5 -0 0.5 7 V 0.5 0.5 -0	522.523	-83.0252	-1.99065
Ta2 Mo1 W1 C4	Full Formula (Ta2 Mo1 W1 C4) Reduced Formula: Ta2MoWC4 abc : 4.424508 4.424508 4.426563 angles: 90.000000 90.000000 90.000000 pbc : True True True Sites (8) # SP a b c --- ---- --- ---- ---- 0 C 0 0.5 0 1 C 0.5 -0 0 2 C 0 -0 0.5 3 C 0.5 0.5 0.5 4 Mo 0 -0 0 5 Ta 0 0.5 0.5 6 Ta 0.5 -0 0.5 7 W 0.5 0.5 -0	495.68	-85.9249	-2.04062
Zr1 Ta2 Mo1 C4	Full Formula (Zr1 Ta2 Mo1 C4) Reduced Formula: ZrTa2MoC4 abc : 4.493765 4.493765 4.511407 angles: 90.000000 90.000000 90.000000 pbc : True True True Sites (8) # SP a b c --- ---- ---- --- ---- 0 C -0 0.5 -0 1 C 0.5 0 -0 2 C -0 0 0.5 3 C 0.5 0.5 0.5 4 Mo -0 0 0 5 Ta -0 0.5 0.5 6 Ta 0.5 0 0.5 7 Zr 0.5 0.5 -0	502.791	-83.6455	-2.01819
Ta1 Ti2 Mo1 C4	Full Formula (Ta1 Ti2 Mo1 C4) Reduced Formula: TaTi2MoC4 abc : 4.365764 4.385265 4.385265 angles: 90.000000 90.000000 90.000000 pbc : True True True Sites (8) # SP a b c --- ---- ---- ---- ---- 0 C 0 0.5 -0 1 C 0.5 0 0 2 C -0 0 0.5 3 C 0.5 0.5 0.5 4 Mo -0 0 -0 5 Ta 0 0.5 0.5 6 Ti 0.5 -0 0.5 7 Ti 0.5 0.5 -0	515.261	-79.5881	-1.62602
Ta1 V2 Mo1 C4	Full Formula (Ta1 V2 Mo1 C4) Reduced Formula: TaV2MoC4 abc : 4.299708 4.319313 4.319313 angles: 90.000000 90.000000 90.000000 pbc : True True True Sites (8) # SP a b c --- ---- --- ---- ---- 0 C 0 0.5 -0 1 C 0.5 -0 0 2 C 0 0 0.5 3 C 0.5 0.5 0.5 4 Mo 0 0 -0 5 Ta 0 0.5 0.5 6 V 0.5 -0 0.5 7 V 0.5 0.5 0	467.225	-79.6507	-1.69384
Ta1 Mo1 W2 C4	Full Formula (Ta1 Mo1 W2 C4) Reduced Formula: TaMo(WC2)2 abc : 4.394994 4.404167 4.404167 angles: 90.000000 90.000000 90.000000 pbc : True True True Sites (8) # SP a b c --- ---- ---- ---- ---- 0 C -0 0.5 0 1 C 0.5 0 -0 2 C -0 -0 0.5 3 C 0.5 0.5 0.5 4 Mo -0 -0 0 5 Ta -0 0.5 0.5 6 W 0.5 -0 0.5 7 W 0.5 0.5 0	416.833	-85.2699	-1.77124
Nb1 Cr2 W1 C4	Full Formula (Nb1 Cr2 W1 C4) Reduced Formula: NbCr2WC4 abc : 4.271228 4.285530 4.285530 angles: 90.000000 90.000000 90.000000 pbc : True True True Sites (8) # SP a b c --- ---- ---- ---- ---- 0 C -0 0.5 -0 1 C 0.5 0 -0 2 C -0 -0 0.5 3 C 0.5 0.5 0.5 4 Cr -0 -0 -0 5 Cr -0 0.5 0.5 6 Nb 0.5 0 0.5 7 W 0.5 0.5 -0	459.347	-78.3696	-1.7587
Zr2 Ta1 Mo1 C4	Full Formula (Zr2 Ta1 Mo1 C4) Reduced Formula: Zr2TaMoC4 abc : 4.529935 4.565685 4.565685 angles: 90.000000 90.000000 90.000000 pbc : True True True Sites (8) # SP a b c --- ---- ---- ---- ---- 0 C -0 0.5 0 1 C 0.5 0 0 2 C -0 0 0.5 3 C 0.5 0.5 0.5 4 Mo 0 0 0 5 Ta -0 0.5 0.5 6 Zr 0.5 -0 0.5 7 Zr 0.5 0.5 -0	442.737	-80.7629	-1.73287
Ti3 Mo1 C4	Full Formula (Ti3 Mo1 C4) Reduced Formula: Ti3MoC4 abc : 4.336472 4.336472 4.336472 angles: 90.000000 90.000000 90.000000 pbc : True True True Sites (8) # SP a b c --- ---- ---- ---- ---- 0 C -0 0.5 -0 1 C 0.5 -0 -0 2 C -0 0 0.5 3 C 0.5 0.5 0.5 4 Mo 0 0 0 5 Ti 0 0.5 0.5 6 Ti 0.5 0 0.5 7 Ti 0.5 0.5 0	483.399	-75.8472	-1.2534
Ti2 V1 Mo1 C4	Full Formula (Ti2 V1 Mo1 C4) Reduced Formula: Ti2VMoC4 abc : 4.300307 4.300307 4.292527 angles: 90.000000 90.000000 90.000000 pbc : True True True Sites (8) # SP a b c --- ---- ---- --- ---- 0 C -0 0.5 0 1 C 0.5 0 0 2 C -0 0 0.5 3 C 0.5 0.5 0.5 4 Mo -0 0 -0 5 Ti -0 0.5 0.5 6 Ti 0.5 0 0.5 7 V 0.5 0.5 0	489.169	-76.0059	-1.30323
Ti2 Mo1 W1 C4	Full Formula (Ti2 Mo1 W1 C4) Reduced Formula: Ti2MoWC4 abc : 4.356631 4.356631 4.320799 angles: 90.000000 90.000000 90.000000 pbc : True True True Sites (8) # SP a b c --- ---- ---- ---- ---- 0 C -0 0.5 0 1 C 0.5 -0 0 2 C -0 -0 0.5 3 C 0.5 0.5 0.5 4 Mo -0 -0 -0 5 Ti -0 0.5 0.5 6 Ti 0.5 -0 0.5 7 W 0.5 0.5 -0	510.945	-79.3449	-1.40811
Zr1 Ti2 Mo1 C4	Full Formula (Zr1 Ti2 Mo1 C4) Reduced Formula: ZrTi2MoC4 abc : 4.435542 4.435542 4.437550 angles: 90.000000 90.000000 90.000000 pbc : True True True Sites (8) # SP a b c --- ---- --- --- --- 0 C 0 0.5 0 1 C 0.5 0 0 2 C 0 0 0.5 3 C 0.5 0.5 0.5 4 Mo 0 0 0 5 Ti 0 0.5 0.5 6 Ti 0.5 0 0.5 7 Zr 0.5 0.5 0	454.141	-76.1233	-1.26791
Ti1 V2 Mo1 C4	Full Formula (Ti1 V2 Mo1 C4) Reduced Formula: TiV2MoC4 abc : 4.262194 4.257849 4.257849 angles: 90.000000 90.000000 90.000000 pbc : True True True Sites (8) # SP a b c --- ---- ---- ---- --- 0 C -0 0.5 0 1 C 0.5 -0 0 2 C -0 0 0.5 3 C 0.5 0.5 0.5 4 Mo 0 0 0 5 Ti 0 0.5 0.5 6 V 0.5 0 0.5 7 V 0.5 0.5 0	508.42	-76.2472	-1.36339
Ti1 Mo1 W2 C4	Full Formula (Ti1 Mo1 W2 C4) Reduced Formula: TiMo(WC2)2 abc : 4.356236 4.359998 4.359998 angles: 90.000000 90.000000 90.000000 pbc : True True True Sites (8) # SP a b c --- ---- ---- ---- ---- 0 C -0 0.5 -0 1 C 0.5 -0 0 2 C -0 -0 0.5 3 C 0.5 0.5 0.5 4 Mo -0 0 -0 5 Ti -0 0.5 0.5 6 W 0.5 -0 0.5 7 W 0.5 0.5 -0	506.822	-82.2631	-1.49039
Zr2 Ti1 Mo1 C4	Full Formula (Zr2 Ti1 Mo1 C4) Reduced Formula: Zr2TiMoC4 abc : 4.512154 4.537104 4.537104 angles: 90.000000 90.000000 90.000000 pbc : True True True Sites (8) # SP a b c --- ---- ---- ---- --- 0 C -0 0.5 0 1 C 0.5 0 0 2 C -0 0 0.5 3 C 0.5 0.5 0.5 4 Mo -0 0 0 5 Ti -0 0.5 0.5 6 Zr 0.5 -0 0.5 7 Zr 0.5 0.5 0	436.297	-76.8369	-1.33712
V3 Mo1 C4	Full Formula (V3 Mo1 C4) Reduced Formula: V3MoC4 abc : 4.220936 4.220936 4.220936 angles: 90.000000 90.000000 90.000000 pbc : True True True Sites (8) # SP a b c --- ---- ---- ---- ---- 0 C 0 0.5 0 1 C 0.5 0 0 2 C 0 -0 0.5 3 C 0.5 0.5 0.5 4 Mo -0 -0 -0 5 V 0 0.5 0.5 6 V 0.5 0 0.5 7 V 0.5 0.5 0	467.027	-76.5509	-1.43136
V2 Mo1 W1 C4	Full Formula (V2 Mo1 W1 C4) Reduced Formula: V2MoWC4 abc : 4.285494 4.285494 4.268745 angles: 90.000000 90.000000 90.000000 pbc : True True True Sites (8) # SP a b c --- ---- ---- ---- ---- 0 C -0 0.5 -0 1 C 0.5 -0 -0 2 C 0 -0 0.5 3 C 0.5 0.5 0.5 4 Mo 0 -0 0 5 V 0 0.5 0.5 6 V 0.5 0 0.5 7 W 0.5 0.5 -0	533.674	-79.4809	-1.48511
Zr1 Nb1 Cr2 C4	Full Formula (Zr1 Nb1 Cr2 C4) Reduced Formula: ZrNb(CrC2)2 abc : 4.335521 4.386039 4.386039 angles: 90.000000 90.000000 90.000000 pbc : True True True Sites (8) # SP a b c --- ---- ---- ---- ---- 0 C -0 0.5 0 1 C 0.5 0 0 2 C -0 0 0.5 3 C 0.5 0.5 0.5 4 Cr -0 0 -0 5 Cr -0 0.5 0.5 6 Nb 0.5 -0 0.5 7 Zr 0.5 0.5 0	404.775	-74.8786	-1.58483
Zr1 V2 Mo1 C4	Full Formula (Zr1 V2 Mo1 C4) Reduced Formula: ZrV2MoC4 abc : 4.366884 4.366884 4.357838 angles: 90.000000 90.000000 90.000000 pbc : True True True Sites (8) # SP a b c --- ---- --- ---- ---- 0 C 0 0.5 0 1 C 0.5 -0 0 2 C 0 -0 0.5 3 C 0.5 0.5 0.5 4 Mo 0 -0 0 5 V 0 0.5 0.5 6 V 0.5 -0 0.5 7 Zr 0.5 0.5 -0	454.796	-76.1516	-1.33145
V1 Mo1 W2 C4	Full Formula (V1 Mo1 W2 C4) Reduced Formula: VMo(WC2)2 abc : 4.331244 4.331747 4.331747 angles: 90.000000 90.000000 90.000000 pbc : True True True Sites (8) # SP a b c --- ---- ---- ---- ---- 0 C 0 0.5 -0 1 C 0.5 -0 -0 2 C -0 0 0.5 3 C 0.5 0.5 0.5 4 Mo 0 0 -0 5 V -0 0.5 0.5 6 W 0.5 -0 0.5 7 W 0.5 0.5 0	461.774	-82.1478	-1.50598
Zr2 V1 Mo1 C4	Full Formula (Zr2 V1 Mo1 C4) Reduced Formula: Zr2VMoC4 abc : 4.465303 4.510996 4.510996 angles: 90.000000 90.000000 90.000000 pbc : True True True Sites (8) # SP a b c --- ---- --- --- --- 0 C 0 0.5 0 1 C 0.5 0 0 2 C 0 0 0.5 3 C 0.5 0.5 0.5 4 Mo 0 0 0 5 V 0 0.5 0.5 6 Zr 0.5 0 0.5 7 Zr 0.5 0.5 0	409.987	-76.6638	-1.34547
Mo1 W3 C4	Full Formula (Mo1 W3 C4) Reduced Formula: MoW3C4 abc : 4.376874 4.376874 4.376874 angles: 90.000000 90.000000 90.000000 pbc : True True True Sites (8) # SP a b c --- ---- ---- ---- ---- 0 C 0 0.5 0 1 C 0.5 0 0 2 C 0 -0 0.5 3 C 0.5 0.5 0.5 4 Mo 0 -0 -0 5 W -0 0.5 0.5 6 W 0.5 -0 0.5 7 W 0.5 0.5 -0	444.59	-84.6513	-1.50641
Zr1 Mo1 W2 C4	Full Formula (Zr1 Mo1 W2 C4) Reduced Formula: ZrMo(WC2)2 abc : 4.443072 4.443072 4.441235 angles: 90.000000 90.000000 90.000000 pbc : True True True Sites (8) # SP a b c --- ---- --- ---- ---- 0 C 0 0.5 -0 1 C 0.5 -0 -0 2 C 0 -0 0.5 3 C 0.5 0.5 0.5 4 Mo 0 -0 -0 5 W 0 0.5 0.5 6 W 0.5 -0 0.5 7 Zr 0.5 0.5 0	483.886	-82.54	-1.505
Zr2 Mo1 W1 C4	Full Formula (Zr2 Mo1 W1 C4) Reduced Formula: Zr2MoWC4 abc : 4.487891 4.537197 4.537197 angles: 90.000000 90.000000 90.000000 pbc : True True True Sites (8) # SP a b c --- ---- ---- --- ---- 0 C -0 0.5 -0 1 C 0.5 0 -0 2 C -0 0 0.5 3 C 0.5 0.5 0.5 4 Mo -0 0 -0 5 W -0 0.5 0.5 6 Zr 0.5 0 0.5 7 Zr 0.5 0.5 -0	458.708	-80.2414	-1.48017
Zr3 Mo1 C4	Full Formula (Zr3 Mo1 C4) Reduced Formula: Zr3MoC4 abc : 4.613417 4.613417 4.613417 angles: 90.000000 90.000000 90.000000 pbc : True True True Sites (8) # SP a b c --- ---- ---- ---- ---- 0 C 0 0.5 0 1 C 0.5 0 0 2 C 0 0 0.5 3 C 0.5 0.5 0.5 4 Mo 0 0 0 5 Zr -0 0.5 0.5 6 Zr 0.5 -0 0.5 7 Zr 0.5 0.5 -0	421.44	-77.8803	-1.44754
Ta1 Nb3 C4	Full Formula (Ta1 Nb3 C4) Reduced Formula: TaNb3C4 abc : 4.480451 4.480451 4.480451 angles: 90.000000 90.000000 90.000000 pbc : True True True Sites (8) # SP a b c --- ---- ---- ---- ---- 0 C -0 0.5 -0 1 C 0.5 -0 -0 2 C 0 0 0.5 3 C 0.5 0.5 0.5 4 Nb 0 -0 -0 5 Nb 0 0.5 0.5 6 Nb 0.5 0 0.5 7 Ta 0.5 0.5 -0	415.552	-83.8739	-2.13423
Ti1 Nb3 C4	Full Formula (Ti1 Nb3 C4) Reduced Formula: TiNb3C4 abc : 4.448698 4.448698 4.448698 angles: 90.000000 90.000000 90.000000 pbc : True True True Sites (8) # SP a b c --- ---- ---- ---- ---- 0 C 0 0.5 -0 1 C 0.5 -0 -0 2 C -0 -0 0.5 3 C 0.5 0.5 0.5 4 Nb 0 -0 0 5 Nb -0 0.5 0.5 6 Nb 0.5 0 0.5 7 Ti 0.5 0.5 0	529.459	-80.4027	-1.79533
Nb3 V1 C4	Full Formula (Nb3 V1 C4) Reduced Formula: Nb3VC4 abc : 4.418255 4.418255 4.418255 angles: 90.000000 90.000000 90.000000 pbc : True True True Sites (8) # SP a b c --- ---- ---- ---- ---- 0 C -0 0.5 -0 1 C 0.5 0 -0 2 C -0 0 0.5 3 C 0.5 0.5 0.5 4 Nb 0 -0 0 5 Nb 0 0.5 0.5 6 Nb 0.5 0 0.5 7 V 0.5 0.5 -0	483.82	-80.213	-1.80163
Nb3 W1 C4	Full Formula (Nb3 W1 C4) Reduced Formula: Nb3WC4 abc : 4.450505 4.450505 4.450505 angles: 90.000000 90.000000 90.000000 pbc : True True True Sites (8) # SP a b c --- ---- ---- ---- ---- 0 C 0 0.5 -0 1 C 0.5 0 -0 2 C 0 0 0.5 3 C 0.5 0.5 0.5 4 Nb -0 0 0 5 Nb -0 0.5 0.5 6 Nb 0.5 -0 0.5 7 W 0.5 0.5 0	539.295	-83.3631	-1.88289
Zr1 Nb3 C4	Full Formula (Zr1 Nb3 C4) Reduced Formula: ZrNb3C4 abc : 4.533525 4.533525 4.533525 angles: 90.000000 90.000000 90.000000 pbc : True True True Sites (8) # SP a b c --- ---- --- ---- ---- 0 C 0 0.5 -0 1 C 0.5 -0 -0 2 C 0 -0 0.5 3 C 0.5 0.5 0.5 4 Nb 0 -0 -0 5 Nb 0 0.5 0.5 6 Nb 0.5 -0 0.5 7 Zr 0.5 0.5 0	509.075	-81.0789	-1.85986
Ta2 Nb2 C4	Full Formula (Ta2 Nb2 C4) Reduced Formula: TaNbC2 abc : 4.480133 4.477636 4.477636 angles: 90.000000 90.000000 90.000000 pbc : True True True Sites (8) # SP a b c --- ---- ---- ---- ---- 0 C 0 0.5 -0 1 C 0.5 -0 -0 2 C -0 -0 0.5 3 C 0.5 0.5 0.5 4 Nb -0 -0 -0 5 Nb 0 0.5 0.5 6 Ta 0.5 0 0.5 7 Ta 0.5 0.5 0	407.982	-85.5822	-2.34777
Ta1 Ti1 Nb2 C4	Full Formula (Ta1 Ti1 Nb2 C4) Reduced Formula: TaTi(NbC2)2 abc : 4.446998 4.446794 4.446794 angles: 90.000000 90.000000 90.000000 pbc : True True True Sites (8) # SP a b c --- ---- ---- ---- ---- 0 C -0 0.5 -0 1 C 0.5 0 -0 2 C -0 -0 0.5 3 C 0.5 0.5 0.5 4 Nb 0 0 0 5 Nb 0 0.5 0.5 6 Ta 0.5 0 0.5 7 Ti 0.5 0.5 0	542.542	-82.186	-2.01825
Ta1 Nb2 V1 C4	Full Formula (Ta1 Nb2 V1 C4) Reduced Formula: TaNb2VC4 abc : 4.417218 4.418131 4.418131 angles: 90.000000 90.000000 90.000000 pbc : True True True Sites (8) # SP a b c --- ---- ---- ---- ---- 0 C -0 0.5 -0 1 C 0.5 0 0 2 C 0 0 0.5 3 C 0.5 0.5 0.5 4 Nb 0 0 -0 5 Nb 0 0.5 0.5 6 Ta 0.5 -0 0.5 7 V 0.5 0.5 0	467.577	-81.9682	-2.02102
Ta1 Nb2 W1 C4	Full Formula (Ta1 Nb2 W1 C4) Reduced Formula: TaNb2WC4 abc : 4.447724 4.450567 4.450567 angles: 90.000000 90.000000 90.000000 pbc : True True True Sites (8) # SP a b c --- ---- ---- ---- ---- 0 C -0 0.5 -0 1 C 0.5 -0 0 2 C -0 -0 0.5 3 C 0.5 0.5 0.5 4 Nb -0 -0 0 5 Nb -0 0.5 0.5 6 Ta 0.5 0 0.5 7 W 0.5 0.5 0	548.38	-85.0577	-2.09471
Zr1 Ta1 Nb2 C4	Full Formula (Zr1 Ta1 Nb2 C4) Reduced Formula: ZrTa(NbC2)2 abc : 4.529948 4.529796 4.529796 angles: 90.000000 90.000000 90.000000 pbc : True True True Sites (8) # SP a b c --- ---- ---- --- ---- 0 C -0 0.5 0 1 C 0.5 0 0 2 C -0 0 0.5 3 C 0.5 0.5 0.5 4 Nb 0 0 0 5 Nb 0 0.5 0.5 6 Ta 0.5 0 0.5 7 Zr 0.5 0.5 -0	522.441	-82.8287	-2.07859
Ti2 Nb2 C4	Full Formula (Ti2 Nb2 C4) Reduced Formula: TiNbC2 abc : 4.402889 4.419989 4.419989 angles: 90.000000 90.000000 90.000000 pbc : True True True Sites (8) # SP a b c --- ---- ---- ---- ---- 0 C -0 0.5 0 1 C 0.5 -0 -0 2 C 0 -0 0.5 3 C 0.5 0.5 0.5 4 Nb -0 0 0 5 Nb 0 0.5 0.5 6 Ti 0.5 0 0.5 7 Ti 0.5 0.5 0	468.73	-78.4321	-1.64401
Ti1 Nb2 V1 C4	Full Formula (Ti1 Nb2 V1 C4) Reduced Formula: TiNb2VC4 abc : 4.369518 4.382828 4.382828 angles: 90.000000 90.000000 90.000000 pbc : True True True Sites (8) # SP a b c --- ---- ---- ---- ---- 0 C -0 0.5 0 1 C 0.5 -0 0 2 C -0 -0 0.5 3 C 0.5 0.5 0.5 4 Nb -0 -0 -0 5 Nb 0 0.5 0.5 6 Ti 0.5 0 0.5 7 V 0.5 0.5 -0	523.684	-78.4032	-1.6704
Ti1 Nb2 W1 C4	Full Formula (Ti1 Nb2 W1 C4) Reduced Formula: TiNb2WC4 abc : 4.423210 4.411560 4.411560 angles: 90.000000 90.000000 90.000000 pbc : True True True Sites (8) # SP a b c --- ---- ---- ---- ---- 0 C 0 0.5 -0 1 C 0.5 -0 0 2 C 0 -0 0.5 3 C 0.5 0.5 0.5 4 Nb -0 -0 -0 5 Nb -0 0.5 0.5 6 Ti 0.5 -0 0.5 7 W 0.5 0.5 0	463.549	-81.6596	-1.76495
Zr1 Ti1 Nb2 C4	Full Formula (Zr1 Ti1 Nb2 C4) Reduced Formula: ZrTi(NbC2)2 abc : 4.501567 4.508086 4.508086 angles: 90.000000 90.000000 90.000000 pbc : True True True Sites (8) # SP a b c --- ---- ---- ---- ---- 0 C 0 0.5 0 1 C 0.5 -0 0 2 C -0 -0 0.5 3 C 0.5 0.5 0.5 4 Nb -0 -0 0 5 Nb 0 0.5 0.5 6 Ti 0.5 0 0.5 7 Zr 0.5 0.5 -0	453.686	-79.007	-1.69588
Nb2 V2 C4	Full Formula (Nb2 V2 C4) Reduced Formula: NbVC2 abc : 4.328107 4.350642 4.350642 angles: 90.000000 90.000000 90.000000 pbc : True True True Sites (8) # SP a b c --- ---- ---- ---- ---- 0 C 0 0.5 0 1 C 0.5 -0 0 2 C -0 -0 0.5 3 C 0.5 0.5 0.5 4 Nb -0 0 -0 5 Nb 0 0.5 0.5 6 V 0.5 -0 0.5 7 V 0.5 0.5 -0	501.12	-78.4348	-1.70435
Nb2 V1 W1 C4	Full Formula (Nb2 V1 W1 C4) Reduced Formula: Nb2VWC4 abc : 4.384811 4.385546 4.385546 angles: 90.000000 90.000000 90.000000 pbc : True True True Sites (8) # SP a b c --- ---- ---- ---- ---- 0 C -0 0.5 0 1 C 0.5 0 0 2 C 0 0 0.5 3 C 0.5 0.5 0.5 4 Nb 0 -0 -0 5 Nb -0 0.5 0.5 6 V 0.5 0 0.5 7 W 0.5 0.5 -0	511.415	-81.5759	-1.78449
Zr1 Nb2 V1 C4	Full Formula (Zr1 Nb2 V1 C4) Reduced Formula: ZrNb2VC4 abc : 4.478009 4.470592 4.470592 angles: 90.000000 90.000000 90.000000 pbc : True True True Sites (8) # SP a b c --- ---- ---- ---- ---- 0 C 0 0.5 -0 1 C 0.5 -0 -0 2 C 0 -0 0.5 3 C 0.5 0.5 0.5 4 Nb -0 -0 0 5 Nb -0 0.5 0.5 6 V 0.5 -0 0.5 7 Zr 0.5 0.5 0	483.851	-78.8261	-1.70326
Nb2 W2 C4	Full Formula (Nb2 W2 C4) Reduced Formula: NbWC2 abc : 4.418811 4.425238 4.425238 angles: 90.000000 90.000000 90.000000 pbc : True True True Sites (8) # SP a b c --- ---- ---- ---- ---- 0 C -0 0.5 0 1 C 0.5 -0 -0 2 C -0 0 0.5 3 C 0.5 0.5 0.5 4 Nb 0 -0 0 5 Nb -0 0.5 0.5 6 W 0.5 0 0.5 7 W 0.5 0.5 0	505.655	-84.471	-1.83387
Zr1 Nb2 W1 C4	Full Formula (Zr1 Nb2 W1 C4) Reduced Formula: ZrNb2WC4 abc : 4.512728 4.493542 4.493542 angles: 90.000000 90.000000 90.000000 pbc : True True True Sites (8) # SP a b c --- ---- ---- ---- ---- 0 C -0 0.5 0 1 C 0.5 0 -0 2 C 0 0 0.5 3 C 0.5 0.5 0.5 4 Nb -0 -0 -0 5 Nb 0 0.5 0.5 6 W 0.5 -0 0.5 7 Zr 0.5 0.5 0	477.008	-82.1872	-1.8109
Zr2 Nb2 C4	Full Formula (Zr2 Nb2 C4) Reduced Formula: ZrNbC2 abc : 4.575277 4.596644 4.596644 angles: 90.000000 90.000000 90.000000 pbc : True True True Sites (8) # SP a b c --- ---- ---- ---- ---- 0 C -0 0.5 -0 1 C 0.5 0 -0 2 C -0 -0 0.5 3 C 0.5 0.5 0.5 4 Nb 0 -0 -0 5 Nb -0 0.5 0.5 6 Zr 0.5 0 0.5 7 Zr 0.5 0.5 0	446.926	-79.9515	-1.79394
Ta3 Nb1 C4	Full Formula (Ta3 Nb1 C4) Reduced Formula: Ta3NbC4 abc : 4.476708 4.476708 4.476708 angles: 90.000000 90.000000 90.000000 pbc : True True True Sites (8) # SP a b c --- ---- --- ---- --- 0 C 0 0.5 0 1 C 0.5 0 0 2 C 0 -0 0.5 3 C 0.5 0.5 0.5 4 Nb 0 0 0 5 Ta 0 0.5 0.5 6 Ta 0.5 0 0.5 7 Ta 0.5 0.5 0	407.609	-87.2975	-2.56219
Ta2 Ti1 Nb1 C4	Full Formula (Ta2 Ti1 Nb1 C4) Reduced Formula: Ta2TiNbC4 abc : 4.444931 4.444931 4.445952 angles: 90.000000 90.000000 90.000000 pbc : True True True Sites (8) # SP a b c --- ---- ---- ---- ---- 0 C 0 0.5 -0 1 C 0.5 0 -0 2 C 0 0 0.5 3 C 0.5 0.5 0.5 4 Nb -0 -0 0 5 Ta 0 0.5 0.5 6 Ta 0.5 0 0.5 7 Ti 0.5 0.5 0	554.67	-83.9513	-2.23892
Ta2 Nb1 V1 C4	Full Formula (Ta2 Nb1 V1 C4) Reduced Formula: Ta2NbVC4 abc : 4.416507 4.416507 4.419515 angles: 90.000000 90.000000 90.000000 pbc : True True True Sites (8) # SP a b c --- ---- ---- ---- ---- 0 C -0 0.5 0 1 C 0.5 0 0 2 C -0 0 0.5 3 C 0.5 0.5 0.5 4 Nb -0 0 -0 5 Ta -0 0.5 0.5 6 Ta 0.5 -0 0.5 7 V 0.5 0.5 -0	460.694	-83.7303	-2.24129
Ta2 Nb1 W1 C4	Full Formula (Ta2 Nb1 W1 C4) Reduced Formula: Ta2NbWC4 abc : 4.447740 4.447740 4.451385 angles: 90.000000 90.000000 90.000000 pbc : True True True Sites (8) # SP a b c --- ---- ---- --- ---- 0 C -0 0.5 -0 1 C 0.5 0 -0 2 C -0 0 0.5 3 C 0.5 0.5 0.5 4 Nb -0 0 -0 5 Ta -0 0.5 0.5 6 Ta 0.5 0 0.5 7 W 0.5 0.5 0	555.75	-86.752	-2.3065
Zr1 Ta2 Nb1 C4	Full Formula (Zr1 Ta2 Nb1 C4) Reduced Formula: ZrTa2NbC4 abc : 4.526050 4.526050 4.526586 angles: 90.000000 90.000000 90.000000 pbc : True True True Sites (8) # SP a b c --- ---- ---- ---- ---- 0 C 0 0.5 0 1 C 0.5 -0 0 2 C 0 -0 0.5 3 C 0.5 0.5 0.5 4 Nb -0 -0 0 5 Ta 0 0.5 0.5 6 Ta 0.5 -0 0.5 7 Zr 0.5 0.5 -0	532.966	-84.5645	-2.29557
Ta1 Ti2 Nb1 C4	Full Formula (Ta1 Ti2 Nb1 C4) Reduced Formula: TaTi2NbC4 abc : 4.402287 4.418415 4.418415 angles: 90.000000 90.000000 90.000000 pbc : True True True Sites (8) # SP a b c --- ---- ---- ---- ---- 0 C -0 0.5 0 1 C 0.5 -0 -0 2 C 0 -0 0.5 3 C 0.5 0.5 0.5 4 Nb -0 0 -0 5 Ta -0 0.5 0.5 6 Ti 0.5 0 0.5 7 Ti 0.5 0.5 0	489.621	-80.2705	-1.87381
Ta1 Nb1 V2 C4	Full Formula (Ta1 Nb1 V2 C4) Reduced Formula: TaNb(VC2)2 abc : 4.330488 4.352229 4.352229 angles: 90.000000 90.000000 90.000000 pbc : True True True Sites (8) # SP a b c --- ---- ---- ---- ---- 0 C -0 0.5 -0 1 C 0.5 -0 0 2 C -0 0 0.5 3 C 0.5 0.5 0.5 4 Nb -0 0 -0 5 Ta -0 0.5 0.5 6 V 0.5 0 0.5 7 V 0.5 0.5 -0	494.711	-80.2169	-1.92711
Ta1 Nb1 W2 C4	Full Formula (Ta1 Nb1 W2 C4) Reduced Formula: TaNb(WC2)2 abc : 4.420187 4.425248 4.425248 angles: 90.000000 90.000000 90.000000 pbc : True True True Sites (8) # SP a b c --- ---- ---- ---- ---- 0 C -0 0.5 -0 1 C 0.5 -0 0 2 C -0 0 0.5 3 C 0.5 0.5 0.5 4 Nb 0 0 -0 5 Ta -0 0.5 0.5 6 W 0.5 -0 0.5 7 W 0.5 0.5 0	498.15	-86.1239	-2.04049
Zr2 Ta1 Nb1 C4	Full Formula (Zr2 Ta1 Nb1 C4) Reduced Formula: Zr2TaNbC4 abc : 4.570472 4.591149 4.591149 angles: 90.000000 90.000000 90.000000 pbc : True True True Sites (8) # SP a b c --- ---- ---- ---- ---- 0 C -0 0.5 -0 1 C 0.5 -0 -0 2 C 0 -0 0.5 3 C 0.5 0.5 0.5 4 Nb -0 -0 -0 5 Ta 0 0.5 0.5 6 Zr 0.5 -0 0.5 7 Zr 0.5 0.5 -0	464.443	-81.7268	-2.01585
Ti3 Nb1 C4	Full Formula (Ti3 Nb1 C4) Reduced Formula: Ti3NbC4 abc : 4.376196 4.376196 4.376196 angles: 90.000000 90.000000 90.000000 pbc : True True True Sites (8) # SP a b c --- ---- ---- ---- ---- 0 C 0 0.5 0 1 C 0.5 0 0 2 C -0 0 0.5 3 C 0.5 0.5 0.5 4 Nb -0 -0 -0 5 Ti 0 0.5 0.5 6 Ti 0.5 0 0.5 7 Ti 0.5 0.5 -0	490.461	-76.4027	-1.48533
Ti2 Nb1 V1 C4	Full Formula (Ti2 Nb1 V1 C4) Reduced Formula: Ti2NbVC4 abc : 4.337928 4.337928 4.332267 angles: 90.000000 90.000000 90.000000 pbc : True True True Sites (8) # SP a b c --- ---- ---- ---- ---- 0 C 0 0.5 -0 1 C 0.5 -0 -0 2 C 0 -0 0.5 3 C 0.5 0.5 0.5 4 Nb -0 -0 -0 5 Ti 0 0.5 0.5 6 Ti 0.5 -0 0.5 7 V 0.5 0.5 -0	468.313	-76.4565	-1.52206
Ti2 Nb1 W1 C4	Full Formula (Ti2 Nb1 W1 C4) Reduced Formula: Ti2NbWC4 abc : 4.381214 4.381214 4.365080 angles: 90.000000 90.000000 90.000000 pbc : True True True Sites (8) # SP a b c --- ---- ---- ---- ---- 0 C -0 0.5 -0 1 C 0.5 -0 -0 2 C -0 -0 0.5 3 C 0.5 0.5 0.5 4 Nb 0 0 0 5 Ti 0 0.5 0.5 6 Ti 0.5 -0 0.5 7 W 0.5 0.5 0	537.345	-79.9949	-1.65186
Zr1 Ti2 Nb1 C4	Full Formula (Zr1 Ti2 Nb1 C4) Reduced Formula: ZrTi2NbC4 abc : 4.478893 4.478893 4.467741 angles: 90.000000 90.000000 90.000000 pbc : True True True Sites (8) # SP a b c --- ---- ---- --- ---- 0 C -0 0.5 0 1 C 0.5 0 0 2 C -0 0 0.5 3 C 0.5 0.5 0.5 4 Nb -0 0 0 5 Ti -0 0.5 0.5 6 Ti 0.5 0 0.5 7 Zr 0.5 0.5 -0	454.535	-76.8661	-1.52326
Ti1 Nb1 V2 C4	Full Formula (Ti1 Nb1 V2 C4) Reduced Formula: TiNb(VC2)2 abc : 4.290790 4.298046 4.298046 angles: 90.000000 90.000000 90.000000 pbc : True True True Sites (8) # SP a b c --- ---- ---- ---- ---- 0 C -0 0.5 0 1 C 0.5 -0 -0 2 C 0 -0 0.5 3 C 0.5 0.5 0.5 4 Nb 0 0 0 5 Ti -0 0.5 0.5 6 V 0.5 0 0.5 7 V 0.5 0.5 0	507.952	-76.6697	-1.57872
Ti1 Nb1 W2 C4	Full Formula (Ti1 Nb1 W2 C4) Reduced Formula: TiNb(WC2)2 abc : 4.382770 4.385484 4.385484 angles: 90.000000 90.000000 90.000000 pbc : True True True Sites (8) # SP a b c --- ---- ---- ---- ---- 0 C 0 0.5 0 1 C 0.5 -0 0 2 C 0 -0 0.5 3 C 0.5 0.5 0.5 4 Nb -0 -0 0 5 Ti 0 0.5 0.5 6 W 0.5 0 0.5 7 W 0.5 0.5 -0	525.283	-82.9859	-1.74324
Zr2 Ti1 Nb1 C4	Full Formula (Zr2 Ti1 Nb1 C4) Reduced Formula: Zr2TiNbC4 abc : 4.556305 4.570731 4.570731 angles: 90.000000 90.000000 90.000000 pbc : True True True Sites (8) # SP a b c --- ---- ---- ---- ---- 0 C -0 0.5 -0 1 C 0.5 -0 -0 2 C -0 -0 0.5 3 C 0.5 0.5 0.5 4 Nb 0 0 -0 5 Ti 0 0.5 0.5 6 Zr 0.5 -0 0.5 7 Zr 0.5 0.5 -0	441.213	-77.7318	-1.61148
Nb1 V3 C4	Full Formula (Nb1 V3 C4) Reduced Formula: NbV3C4 abc : 4.255552 4.255552 4.255552 angles: 90.000000 90.000000 90.000000 pbc : True True True Sites (8) # SP a b c --- ---- ---- ---- ---- 0 C -0 0.5 -0 1 C 0.5 -0 -0 2 C 0 -0 0.5 3 C 0.5 0.5 0.5 4 Nb 0 0 0 5 V -0 0.5 0.5 6 V 0.5 -0 0.5 7 V 0.5 0.5 -0	531.057	-76.9214	-1.64017
Nb1 V2 W1 C4	Full Formula (Nb1 V2 W1 C4) Reduced Formula: NbV2WC4 abc : 4.316196 4.316196 4.298412 angles: 90.000000 90.000000 90.000000 pbc : True True True Sites (8) # SP a b c --- ---- ---- ---- ---- 0 C 0 0.5 0 1 C 0.5 -0 0 2 C 0 -0 0.5 3 C 0.5 0.5 0.5 4 Nb -0 0 -0 5 V 0 0.5 0.5 6 V 0.5 -0 0.5 7 W 0.5 0.5 0	469.129	-80.0209	-1.71512
Zr1 Nb1 V2 C4	Full Formula (Zr1 Nb1 V2 C4) Reduced Formula: ZrNb(VC2)2 abc : 4.410834 4.410834 4.380079 angles: 90.000000 90.000000 90.000000 pbc : True True True Sites (8) # SP a b c --- ---- ---- ---- ---- 0 C 0 0.5 -0 1 C 0.5 0 -0 2 C -0 0 0.5 3 C 0.5 0.5 0.5 4 Nb -0 -0 0 5 V -0 0.5 0.5 6 V 0.5 0 0.5 7 Zr 0.5 0.5 -0	464.731	-76.7333	-1.56666
Nb1 V1 W2 C4	Full Formula (Nb1 V1 W2 C4) Reduced Formula: NbV(WC2)2 abc : 4.354039 4.357961 4.357961 angles: 90.000000 90.000000 90.000000 pbc : True True True Sites (8) # SP a b c --- ---- ---- ---- ---- 0 C 0 0.5 0 1 C 0.5 0 -0 2 C 0 -0 0.5 3 C 0.5 0.5 0.5 4 Nb -0 -0 0 5 V 0 0.5 0.5 6 W 0.5 0 0.5 7 W 0.5 0.5 0	518.527	-82.8906	-1.76133
Zr2 Nb1 V1 C4	Full Formula (Zr2 Nb1 V1 C4) Reduced Formula: Zr2NbVC4 abc : 4.510892 4.543087 4.543087 angles: 90.000000 90.000000 90.000000 pbc : True True True Sites (8) # SP a b c --- ---- ---- ---- ---- 0 C 0 0.5 -0 1 C 0.5 -0 -0 2 C -0 0 0.5 3 C 0.5 0.5 0.5 4 Nb 0 0 0 5 V -0 0.5 0.5 6 Zr 0.5 -0 0.5 7 Zr 0.5 0.5 -0	434.287	-77.4392	-1.6049
Nb1 W3 C4	Full Formula (Nb1 W3 C4) Reduced Formula: NbW3C4 abc : 4.399653 4.399653 4.399653 angles: 90.000000 90.000000 90.000000 pbc : True True True Sites (8) # SP a b c --- ---- ---- ---- ---- 0 C -0 0.5 -0 1 C 0.5 -0 -0 2 C 0 -0 0.5 3 C 0.5 0.5 0.5 4 Nb 0 0 0 5 W 0 0.5 0.5 6 W 0.5 0 0.5 7 W 0.5 0.5 0	396.426	-85.4686	-1.77108
Zr1 Nb1 W2 C4	Full Formula (Zr1 Nb1 W2 C4) Reduced Formula: ZrNb(WC2)2 abc : 4.471796 4.471796 4.461943 angles: 90.000000 90.000000 90.000000 pbc : True True True Sites (8) # SP a b c --- ---- ---- ---- ---- 0 C -0 0.5 -0 1 C 0.5 0 -0 2 C -0 0 0.5 3 C 0.5 0.5 0.5 4 Nb -0 -0 -0 5 W -0 0.5 0.5 6 W 0.5 0 0.5 7 Zr 0.5 0.5 0	484.117	-83.3459	-1.76824
Zr2 Nb1 W1 C4	Full Formula (Zr2 Nb1 W1 C4) Reduced Formula: Zr2NbWC4 abc : 4.534926 4.559209 4.559209 angles: 90.000000 90.000000 90.000000 pbc : True True True Sites (8) # SP a b c --- ---- ---- ---- ---- 0 C 0 0.5 -0 1 C 0.5 -0 -0 2 C -0 -0 0.5 3 C 0.5 0.5 0.5 4 Nb -0 0 0 5 W 0 0.5 0.5 6 Zr 0.5 -0 0.5 7 Zr 0.5 0.5 -0	458.217	-81.0995	-1.74994
Zr3 Nb1 C4	Full Formula (Zr3 Nb1 C4) Reduced Formula: Zr3NbC4 abc : 4.647636 4.647636 4.647636 angles: 90.000000 90.000000 90.000000 pbc : True True True Sites (8) # SP a b c --- ---- ---- ---- ---- 0 C -0 0.5 -0 1 C 0.5 0 -0 2 C -0 0 0.5 3 C 0.5 0.5 0.5 4 Nb 0 0 0 5 Zr -0 0.5 0.5 6 Zr 0.5 -0 0.5 7 Zr 0.5 0.5 -0	430.952	-78.9212	-1.74015
Ta2 Cr2 C4	Full Formula (Ta2 Cr2 C4) Reduced Formula: TaCrC2 abc : 4.314425 4.321310 4.321310 angles: 90.000000 90.000000 90.000000 pbc : True True True Sites (8) # SP a b c --- ---- ---- ---- ---- 0 C 0 0.5 0 1 C 0.5 0 0 2 C 0 -0 0.5 3 C 0.5 0.5 0.5 4 Cr 0 -0 0 5 Cr -0 0.5 0.5 6 Ta 0.5 0 0.5 7 Ta 0.5 0.5 -0	469.819	-80.2793	-2.18491
Ta1 Cr3 C4	Full Formula (Ta1 Cr3 C4) Reduced Formula: TaCr3C4 abc : 4.208869 4.208869 4.208869 angles: 90.000000 90.000000 90.000000 pbc : True True True Sites (8) # SP a b c --- ---- ---- ---- ---- 0 C 0 0.5 0 1 C 0.5 0 0 2 C -0 -0 0.5 3 C 0.5 0.5 0.5 4 Cr 0 -0 -0 5 Cr -0 0.5 0.5 6 Cr 0.5 0 0.5 7 Ta 0.5 0.5 -0	415.59	-76.3662	-1.94578
Ta1 Ti1 Cr2 C4	Full Formula (Ta1 Ti1 Cr2 C4) Reduced Formula: TaTi(CrC2)2 abc : 4.260877 4.268561 4.268561 angles: 90.000000 90.000000 90.000000 pbc : True True True Sites (8) # SP a b c --- ---- ---- --- ---- 0 C -0 0.5 0 1 C 0.5 0 -0 2 C 0 0 0.5 3 C 0.5 0.5 0.5 4 Cr 0 0 -0 5 Cr -0 0.5 0.5 6 Ta 0.5 0 0.5 7 Ti 0.5 0.5 -0	453.784	-76.7841	-1.84301
Ta1 V1 Cr2 C4	Full Formula (Ta1 V1 Cr2 C4) Reduced Formula: TaV(CrC2)2 abc : 4.230853 4.224063 4.224063 angles: 90.000000 90.000000 90.000000 pbc : True True True Sites (8) # SP a b c --- ---- ---- --- ---- 0 C -0 0.5 0 1 C 0.5 0 -0 2 C -0 0 0.5 3 C 0.5 0.5 0.5 4 Cr -0 0 0 5 Cr -0 0.5 0.5 6 Ta 0.5 0 0.5 7 V 0.5 0.5 0	453.532	-77.1184	-1.91479
Ta1 Cr2 W1 C4	Full Formula (Ta1 Cr2 W1 C4) Reduced Formula: TaCr2WC4 abc : 4.279016 4.288428 4.288428 angles: 90.000000 90.000000 90.000000 pbc : True True True Sites (8) # SP a b c --- ---- ---- ---- ---- 0 C 0 0.5 0 1 C 0.5 0 -0 2 C -0 0 0.5 3 C 0.5 0.5 0.5 4 Cr -0 0 0 5 Cr 0 0.5 0.5 6 Ta 0.5 -0 0.5 7 W 0.5 0.5 -0	462.526	-80.1249	-1.97811
Zr1 Ta1 Cr2 C4	Full Formula (Zr1 Ta1 Cr2 C4) Reduced Formula: ZrTa(CrC2)2 abc : 4.342845 4.385156 4.385156 angles: 90.000000 90.000000 90.000000 pbc : True True True Sites (8) # SP a b c --- ---- --- ---- ---- 0 C 0 0.5 -0 1 C 0.5 -0 0 2 C 0 -0 0.5 3 C 0.5 0.5 0.5 4 Cr 0 -0 -0 5 Cr 0 0.5 0.5 6 Ta 0.5 -0 0.5 7 Zr 0.5 0.5 0	415.72	-76.6824	-1.81031
Ta3 Ti1 C4	Full Formula (Ta3 Ti1 C4) Reduced Formula: Ta3TiC4 abc : 4.443674 4.443674 4.443674 angles: 90.000000 90.000000 90.000000 pbc : True True True Sites (8) # SP a b c --- ---- --- ---- ---- 0 C 0 0.5 -0 1 C 0.5 -0 -0 2 C 0 -0 0.5 3 C 0.5 0.5 0.5 4 Ta 0 0 0 5 Ta 0 0.5 0.5 6 Ta 0.5 0 0.5 7 Ti 0.5 0.5 0	563.648	-85.7252	-2.46065
Ta3 V1 C4	Full Formula (Ta3 V1 C4) Reduced Formula: Ta3VC4 abc : 4.416983 4.416983 4.416983 angles: 90.000000 90.000000 90.000000 pbc : True True True Sites (8) # SP a b c --- ---- --- --- ---- 0 C 0 0.5 -0 1 C 0.5 0 -0 2 C 0 0 0.5 3 C 0.5 0.5 0.5 4 Ta 0 0 0 5 Ta 0 0.5 0.5 6 Ta 0.5 0 0.5 7 V 0.5 0.5 -0	461.767	-85.4957	-2.46196
Ta3 W1 C4	Full Formula (Ta3 W1 C4) Reduced Formula: Ta3WC4 abc : 4.448279 4.448279 4.448279 angles: 90.000000 90.000000 90.000000 pbc : True True True Sites (8) # SP a b c --- ---- --- ---- ---- 0 C 0 0.5 0 1 C 0.5 0 -0 2 C 0 -0 0.5 3 C 0.5 0.5 0.5 4 Ta 0 -0 -0 5 Ta 0 0.5 0.5 6 Ta 0.5 -0 0.5 7 W 0.5 0.5 0	568.016	-88.4429	-2.51786
Zr1 Ta3 C4	Full Formula (Zr1 Ta3 C4) Reduced Formula: ZrTa3C4 abc : 4.522976 4.522976 4.522976 angles: 90.000000 90.000000 90.000000 pbc : True True True Sites (8) # SP a b c --- ---- ---- --- ---- 0 C -0 0.5 -0 1 C 0.5 0 -0 2 C -0 0 0.5 3 C 0.5 0.5 0.5 4 Ta -0 0 -0 5 Ta -0 0.5 0.5 6 Ta 0.5 0 0.5 7 Zr 0.5 0.5 0	541.804	-86.2984	-2.51231
Ta2 Ti2 C4	Full Formula (Ta2 Ti2 C4) Reduced Formula: TaTiC2 abc : 4.402424 4.416759 4.416759 angles: 90.000000 90.000000 90.000000 pbc : True True True Sites (8) # SP a b c --- ---- ---- ---- ---- 0 C -0 0.5 -0 1 C 0.5 -0 0 2 C 0 0 0.5 3 C 0.5 0.5 0.5 4 Ta -0 0 -0 5 Ta 0 0.5 0.5 6 Ti 0.5 0 0.5 7 Ti 0.5 0.5 -0	514.115	-82.104	-2.103
Ti2 Cr2 C4	Full Formula (Ti2 Cr2 C4) Reduced Formula: TiCrC2 abc : 4.181230 4.214802 4.214802 angles: 90.000000 90.000000 90.000000 pbc : True True True Sites (8) # SP a b c --- ---- ---- ---- ---- 0 C -0 0.5 -0 1 C 0.5 -0 0 2 C 0 0 0.5 3 C 0.5 0.5 0.5 4 Cr -0 0 -0 5 Cr -0 0.5 0.5 6 Ti 0.5 0 0.5 7 Ti 0.5 0.5 -0	446.694	-73.2167	-1.49209
Ta2 Ti1 V1 C4	Full Formula (Ta2 Ti1 V1 C4) Reduced Formula: Ta2TiVC4 abc : 4.371247 4.382624 4.382624 angles: 90.000000 90.000000 90.000000 pbc : True True True Sites (8) # SP a b c --- ---- ---- ---- ---- 0 C 0 0.5 0 1 C 0.5 0 -0 2 C -0 -0 0.5 3 C 0.5 0.5 0.5 4 Ta 0 0 -0 5 Ta -0 0.5 0.5 6 Ti 0.5 -0 0.5 7 V 0.5 0.5 0	552.723	-82.0535	-2.12669
Ta2 Ti1 W1 C4	Full Formula (Ta2 Ti1 W1 C4) Reduced Formula: Ta2TiWC4 abc : 4.424105 4.410643 4.410643 angles: 90.000000 90.000000 90.000000 pbc : True True True Sites (8) # SP a b c --- ---- ---- ---- ---- 0 C 0 0.5 -0 1 C 0.5 -0 -0 2 C -0 0 0.5 3 C 0.5 0.5 0.5 4 Ta -0 0 0 5 Ta -0 0.5 0.5 6 Ti 0.5 -0 0.5 7 W 0.5 0.5 0	487.399	-85.1562	-2.20203
Zr1 Ta2 Ti1 C4	Full Formula (Zr1 Ta2 Ti1 C4) Reduced Formula: ZrTa2TiC4 abc : 4.495346 4.501051 4.501051 angles: 90.000000 90.000000 90.000000 pbc : True True True Sites (8) # SP a b c --- ---- ---- ---- ---- 0 C 0 0.5 -0 1 C 0.5 0 0 2 C -0 -0 0.5 3 C 0.5 0.5 0.5 4 Ta 0 -0 -0 5 Ta 0 0.5 0.5 6 Ti 0.5 0 0.5 7 Zr 0.5 0.5 0	487.574	-82.6223	-2.14779
Ta2 V2 C4	Full Formula (Ta2 V2 C4) Reduced Formula: TaVC2 abc : 4.334418 4.352886 4.352886 angles: 90.000000 90.000000 90.000000 pbc : True True True Sites (8) # SP a b c --- ---- ---- ---- ---- 0 C -0 0.5 0 1 C 0.5 -0 -0 2 C -0 0 0.5 3 C 0.5 0.5 0.5 4 Ta 0 0 0 5 Ta -0 0.5 0.5 6 V 0.5 0 0.5 7 V 0.5 0.5 0	484.957	-82.0238	-2.15298
Ta2 V1 W1 C4	Full Formula (Ta2 V1 W1 C4) Reduced Formula: Ta2VWC4 abc : 4.389901 4.385306 4.385306 angles: 90.000000 90.000000 90.000000 pbc : True True True Sites (8) # SP a b c --- ---- ---- ---- ---- 0 C -0 0.5 -0 1 C 0.5 -0 0 2 C -0 -0 0.5 3 C 0.5 0.5 0.5 4 Ta -0 -0 -0 5 Ta -0 0.5 0.5 6 V 0.5 -0 0.5 7 W 0.5 0.5 0	553.688	-85.0526	-2.21908
Zr1 Ta2 V1 C4	Full Formula (Zr1 Ta2 V1 C4) Reduced Formula: ZrTa2VC4 abc : 4.473356 4.466314 4.466314 angles: 90.000000 90.000000 90.000000 pbc : True True True Sites (8) # SP a b c --- ---- ---- ---- ---- 0 C 0 0.5 0 1 C 0.5 -0 -0 2 C 0 -0 0.5 3 C 0.5 0.5 0.5 4 Ta -0 -0 0 5 Ta -0 0.5 0.5 6 V 0.5 -0 0.5 7 Zr 0.5 0.5 -0	514.374	-82.4119	-2.15149
Ta2 W2 C4	Full Formula (Ta2 W2 C4) Reduced Formula: TaWC2 abc : 4.421911 4.425380 4.425380 angles: 90.000000 90.000000 90.000000 pbc : True True True Sites (8) # SP a b c --- ---- ---- ---- ---- 0 C 0 0.5 0 1 C 0.5 0 0 2 C -0 0 0.5 3 C 0.5 0.5 0.5 4 Ta 0 -0 0 5 Ta 0 0.5 0.5 6 W 0.5 0 0.5 7 W 0.5 0.5 -0	484.03	-87.7771	-2.24714
Zr1 Ta2 W1 C4	Full Formula (Zr1 Ta2 W1 C4) Reduced Formula: ZrTa2WC4 abc : 4.509100 4.489148 4.489148 angles: 90.000000 90.000000 90.000000 pbc : True True True Sites (8) # SP a b c --- ---- ---- --- ---- 0 C 0 0.5 -0 1 C 0.5 0 0 2 C -0 0 0.5 3 C 0.5 0.5 0.5 4 Ta -0 0 -0 5 Ta -0 0.5 0.5 6 W 0.5 0 0.5 7 Zr 0.5 0.5 0	503.038	-85.618	-2.23975
Zr2 Ta2 C4	Full Formula (Zr2 Ta2 C4) Reduced Formula: ZrTaC2 abc : 4.566417 4.585674 4.585674 angles: 90.000000 90.000000 90.000000 pbc : True True True Sites (8) # SP a b c --- ---- ---- ---- ---- 0 C 0 0.5 0 1 C 0.5 -0 0 2 C 0 -0 0.5 3 C 0.5 0.5 0.5 4 Ta 0 -0 0 5 Ta -0 0.5 0.5 6 Zr 0.5 0 0.5 7 Zr 0.5 0.5 -0	478.954	-83.498	-2.23725
Ta1 Ti3 C4	Full Formula (Ta1 Ti3 C4) Reduced Formula: TaTi3C4 abc : 4.375581 4.375581 4.375581 angles: 90.000000 90.000000 90.000000 pbc : True True True Sites (8) # SP a b c --- ---- ---- ---- ---- 0 C 0 0.5 0 1 C 0.5 0 0 2 C -0 0 0.5 3 C 0.5 0.5 0.5 4 Ta -0 -0 -0 5 Ti -0 0.5 0.5 6 Ti 0.5 -0 0.5 7 Ti 0.5 0.5 -0	505.149	-78.2927	-1.72158
Ti1 V1 Cr2 C4	Full Formula (Ti1 V1 Cr2 C4) Reduced Formula: TiV(CrC2)2 abc : 4.153370 4.159510 4.159510 angles: 90.000000 90.000000 90.000000 pbc : True True True Sites (8) # SP a b c --- ---- ---- ---- ---- 0 C -0 0.5 0 1 C 0.5 -0 0 2 C 0 -0 0.5 3 C 0.5 0.5 0.5 4 Cr 0 0 -0 5 Cr 0 0.5 0.5 6 Ti 0.5 -0 0.5 7 V 0.5 0.5 0	477.324	-73.8396	-1.59995
Ta1 Ti2 V1 C4	Full Formula (Ta1 Ti2 V1 C4) Reduced Formula: TaTi2VC4 abc : 4.340050 4.340050 4.332916 angles: 90.000000 90.000000 90.000000 pbc : True True True Sites (8) # SP a b c --- ---- ---- ---- ---- 0 C -0 0.5 -0 1 C 0.5 -0 -0 2 C 0 0 0.5 3 C 0.5 0.5 0.5 4 Ta -0 -0 0 5 Ti 0 0.5 0.5 6 Ti 0.5 0 0.5 7 V 0.5 0.5 0	484.423	-78.331	-1.75638
Ta1 Ti2 W1 C4	Full Formula (Ta1 Ti2 W1 C4) Reduced Formula: TaTi2WC4 abc : 4.382545 4.382545 4.363723 angles: 90.000000 90.000000 90.000000 pbc : True True True Sites (8) # SP a b c --- ---- ---- --- ---- 0 C -0 0.5 -0 1 C 0.5 0 -0 2 C -0 0 0.5 3 C 0.5 0.5 0.5 4 Ta -0 0 0 5 Ti -0 0.5 0.5 6 Ti 0.5 0 0.5 7 W 0.5 0.5 0	549.567	-81.787	-1.87588
Zr1 Ta1 Ti2 C4	Full Formula (Zr1 Ta1 Ti2 C4) Reduced Formula: ZrTa(TiC2)2 abc : 4.475340 4.475340 4.465080 angles: 90.000000 90.000000 90.000000 pbc : True True True Sites (8) # SP a b c --- ---- --- ---- ---- 0 C 0 0.5 -0 1 C 0.5 -0 -0 2 C 0 -0 0.5 3 C 0.5 0.5 0.5 4 Ta 0 -0 -0 5 Ti 0 0.5 0.5 6 Ti 0.5 -0 0.5 7 Zr 0.5 0.5 0	473.149	-78.7325	-1.75656
Ta1 Ti1 V2 C4	Full Formula (Ta1 Ti1 V2 C4) Reduced Formula: TaTi(VC2)2 abc : 4.296177 4.299945 4.299945 angles: 90.000000 90.000000 90.000000 pbc : True True True Sites (8) # SP a b c --- ---- ---- ---- ---- 0 C 0 0.5 0 1 C 0.5 -0 -0 2 C -0 0 0.5 3 C 0.5 0.5 0.5 4 Ta -0 0 0 5 Ti -0 0.5 0.5 6 V 0.5 0 0.5 7 V 0.5 0.5 0	527.746	-78.5067	-1.80834
Ta1 Ti1 W2 C4	Full Formula (Ta1 Ti1 W2 C4) Reduced Formula: TaTi(WC2)2 abc : 4.387995 4.384758 4.384758 angles: 90.000000 90.000000 90.000000 pbc : True True True Sites (8) # SP a b c --- ---- ---- ---- ---- 0 C -0 0.5 0 1 C 0.5 0 -0 2 C -0 -0 0.5 3 C 0.5 0.5 0.5 4 Ta 0 -0 0 5 Ti -0 0.5 0.5 6 W 0.5 -0 0.5 7 W 0.5 0.5 0	529.845	-84.6961	-1.95701
Zr2 Ta1 Ti1 C4	Full Formula (Zr2 Ta1 Ti1 C4) Reduced Formula: Zr2TaTiC4 abc : 4.550893 4.565283 4.565283 angles: 90.000000 90.000000 90.000000 pbc : True True True Sites (8) # SP a b c --- ---- ---- ---- --- 0 C -0 0.5 0 1 C 0.5 -0 0 2 C -0 -0 0.5 3 C 0.5 0.5 0.5 4 Ta -0 -0 0 5 Ti -0 0.5 0.5 6 Zr 0.5 0 0.5 7 Zr 0.5 0.5 0	458.196	-79.5662	-1.84077
Ta1 V3 C4	Full Formula (Ta1 V3 C4) Reduced Formula: TaV3C4 abc : 4.260466 4.260466 4.260466 angles: 90.000000 90.000000 90.000000 pbc : True True True Sites (8) # SP a b c --- ---- ---- ---- ---- 0 C 0 0.5 0 1 C 0.5 0 0 2 C 0 -0 0.5 3 C 0.5 0.5 0.5 4 Ta -0 -0 -0 5 V -0 0.5 0.5 6 V 0.5 0 0.5 7 V 0.5 0.5 -0	538.886	-78.7312	-1.8664
Ta1 V2 W1 C4	Full Formula (Ta1 V2 W1 C4) Reduced Formula: TaV2WC4 abc : 4.318701 4.318701 4.302099 angles: 90.000000 90.000000 90.000000 pbc : True True True Sites (8) # SP a b c --- ---- --- ---- ---- 0 C 0 0.5 -0 1 C 0.5 -0 -0 2 C 0 -0 0.5 3 C 0.5 0.5 0.5 4 Ta 0 -0 0 5 V 0 0.5 0.5 6 V 0.5 -0 0.5 7 W 0.5 0.5 0	496.287	-81.7713	-1.93391
Zr1 Ta1 V2 C4	Full Formula (Zr1 Ta1 V2 C4) Reduced Formula: ZrTa(VC2)2 abc : 4.409163 4.409163 4.383020 angles: 90.000000 90.000000 90.000000 pbc : True True True Sites (8) # SP a b c --- ---- --- ---- ---- 0 C 0 0.5 0 1 C 0.5 -0 0 2 C 0 -0 0.5 3 C 0.5 0.5 0.5 4 Ta 0 -0 -0 5 V 0 0.5 0.5 6 V 0.5 -0 0.5 7 Zr 0.5 0.5 0	483.481	-78.5576	-1.7947
Ta1 V1 W2 C4	Full Formula (Ta1 V1 W2 C4) Reduced Formula: TaV(WC2)2 abc : 4.357863 4.359398 4.359398 angles: 90.000000 90.000000 90.000000 pbc : True True True Sites (8) # SP a b c --- ---- ---- ---- ---- 0 C -0 0.5 -0 1 C 0.5 0 0 2 C -0 -0 0.5 3 C 0.5 0.5 0.5 4 Ta 0 -0 -0 5 V 0 0.5 0.5 6 W 0.5 0 0.5 7 W 0.5 0.5 0	532.247	-84.6051	-1.97564
Ti1 Cr2 W1 C4	Full Formula (Ti1 Cr2 W1 C4) Reduced Formula: TiCr2WC4 abc : 4.234343 4.224317 4.224317 angles: 90.000000 90.000000 90.000000 pbc : True True True Sites (8) # SP a b c --- ---- ---- ---- ---- 0 C -0 0.5 0 1 C 0.5 -0 -0 2 C 0 -0 0.5 3 C 0.5 0.5 0.5 4 Cr -0 -0 -0 5 Cr 0 0.5 0.5 6 Ti 0.5 0 0.5 7 W 0.5 0.5 0	468.129	-76.9227	-1.67284
Zr2 Ta1 V1 C4	Full Formula (Zr2 Ta1 V1 C4) Reduced Formula: Zr2TaVC4 abc : 4.507026 4.539032 4.539032 angles: 90.000000 90.000000 90.000000 pbc : True True True Sites (8) # SP a b c --- ---- --- --- --- 0 C 0 0.5 0 1 C 0.5 0 0 2 C 0 0 0.5 3 C 0.5 0.5 0.5 4 Ta 0 0 0 5 V 0 0.5 0.5 6 Zr 0.5 0 0.5 7 Zr 0.5 0.5 0	445.794	-79.2508	-1.83136
Ta1 W3 C4	Full Formula (Ta1 W3 C4) Reduced Formula: TaW3C4 abc : 4.401394 4.401394 4.401394 angles: 90.000000 90.000000 90.000000 pbc : True True True Sites (8) # SP a b c --- ---- ---- ---- ---- 0 C -0 0.5 -0 1 C 0.5 -0 -0 2 C 0 -0 0.5 3 C 0.5 0.5 0.5 4 Ta -0 0 0 5 W 0 0.5 0.5 6 W 0.5 0 0.5 7 W 0.5 0.5 0	377.028	-87.0976	-1.9747
Zr1 Ta1 W2 C4	Full Formula (Zr1 Ta1 W2 C4) Reduced Formula: ZrTa(WC2)2 abc : 4.468331 4.468331 4.466455 angles: 90.000000 90.000000 90.000000 pbc : True True True Sites (8) # SP a b c --- ---- --- ---- ---- 0 C 0 0.5 0 1 C 0.5 -0 0 2 C 0 -0 0.5 3 C 0.5 0.5 0.5 4 Ta 0 -0 -0 5 W 0 0.5 0.5 6 W 0.5 -0 0.5 7 Zr 0.5 0.5 -0	502.949	-85.0322	-1.97903
Zr2 Ta1 W1 C4	Full Formula (Zr2 Ta1 W1 C4) Reduced Formula: Zr2TaWC4 abc : 4.527863 4.557569 4.557569 angles: 90.000000 90.000000 90.000000 pbc : True True True Sites (8) # SP a b c --- ---- ---- ---- ---- 0 C -0 0.5 -0 1 C 0.5 -0 -0 2 C -0 -0 0.5 3 C 0.5 0.5 0.5 4 Ta -0 -0 -0 5 W 0 0.5 0.5 6 Zr 0.5 0 0.5 7 Zr 0.5 0.5 0	457.128	-82.8376	-1.9672
Zr3 Ta1 C4	Full Formula (Zr3 Ta1 C4) Reduced Formula: Zr3TaC4 abc : 4.641007 4.641007 4.641007 angles: 90.000000 90.000000 90.000000 pbc : True True True Sites (8) # SP a b c --- ---- ---- ---- ---- 0 C 0 0.5 -0 1 C 0.5 0 -0 2 C -0 0 0.5 3 C 0.5 0.5 0.5 4 Ta -0 0 -0 5 Zr -0 0.5 0.5 6 Zr 0.5 -0 0.5 7 Zr 0.5 0.5 -0	449.678	-80.7183	-1.96478
Ti3 V1 C4	Full Formula (Ti3 V1 C4) Reduced Formula: Ti3VC4 abc : 4.289773 4.289773 4.289773 angles: 90.000000 90.000000 90.000000 pbc : True True True Sites (8) # SP a b c --- ---- ---- ---- ---- 0 C 0 0.5 0 1 C 0.5 -0 0 2 C -0 -0 0.5 3 C 0.5 0.5 0.5 4 Ti -0 -0 -0 5 Ti -0 0.5 0.5 6 Ti 0.5 -0 0.5 7 V 0.5 0.5 -0	484.56	-74.4569	-1.36711
Ti3 W1 C4	Full Formula (Ti3 W1 C4) Reduced Formula: Ti3WC4 abc : 4.334657 4.334657 4.334657 angles: 90.000000 90.000000 90.000000 pbc : True True True Sites (8) # SP a b c --- ---- ---- ---- ---- 0 C -0 0.5 0 1 C 0.5 -0 0 2 C 0 -0 0.5 3 C 0.5 0.5 0.5 4 Ti -0 -0 -0 5 Ti -0 0.5 0.5 6 Ti 0.5 -0 0.5 7 W 0.5 0.5 0	503.705	-78.1739	-1.51923
Zr1 Ti3 C4	Full Formula (Zr1 Ti3 C4) Reduced Formula: ZrTi3C4 abc : 4.443212 4.443212 4.443212 angles: 90.000000 90.000000 90.000000 pbc : True True True Sites (8) # SP a b c --- ---- ---- ---- ---- 0 C -0 0.5 0 1 C 0.5 0 0 2 C 0 0 0.5 3 C 0.5 0.5 0.5 4 Ti -0 -0 0 5 Ti 0 0.5 0.5 6 Ti 0.5 -0 0.5 7 Zr 0.5 0.5 -0	417.535	-74.4645	-1.31806
Ti2 V2 C4	Full Formula (Ti2 V2 C4) Reduced Formula: TiVC2 abc : 4.231711 4.250521 4.250521 angles: 90.000000 90.000000 90.000000 pbc : True True True Sites (8) # SP a b c --- ---- ---- ---- ---- 0 C 0 0.5 0 1 C 0.5 0 0 2 C -0 -0 0.5 3 C 0.5 0.5 0.5 4 Ti 0 -0 -0 5 Ti 0 0.5 0.5 6 V 0.5 -0 0.5 7 V 0.5 0.5 -0	479.233	-74.8252	-1.44315
Ti2 V1 W1 C4	Full Formula (Ti2 V1 W1 C4) Reduced Formula: Ti2VWC4 abc : 4.293601 4.299559 4.299559 angles: 90.000000 90.000000 90.000000 pbc : True True True Sites (8) # SP a b c --- ---- ---- ---- ---- 0 C 0 0.5 0 1 C 0.5 -0 0 2 C -0 0 0.5 3 C 0.5 0.5 0.5 4 Ti 0 0 0 5 Ti -0 0.5 0.5 6 V 0.5 0 0.5 7 W 0.5 0.5 -0	526.599	-78.3047	-1.56559
Zr1 Ti1 Cr2 C4	Full Formula (Zr1 Ti1 Cr2 C4) Reduced Formula: ZrTi(CrC2)2 abc : 4.279827 4.340705 4.340705 angles: 90.000000 90.000000 90.000000 pbc : True True True Sites (8) # SP a b c --- ---- ---- --- ---- 0 C -0 0.5 0 1 C 0.5 0 0 2 C -0 0 0.5 3 C 0.5 0.5 0.5 4 Cr 0 0 0 5 Cr -0 0.5 0.5 6 Ti 0.5 0 0.5 7 Zr 0.5 0.5 -0	390.869	-72.8788	-1.42986
Zr1 Ti2 V1 C4	Full Formula (Zr1 Ti2 V1 C4) Reduced Formula: ZrTi2VC4 abc : 4.411410 4.393403 4.393403 angles: 90.000000 90.000000 90.000000 pbc : True True True Sites (8) # SP a b c --- ---- ---- --- ---- 0 C -0 0.5 0 1 C 0.5 0 -0 2 C -0 0 0.5 3 C 0.5 0.5 0.5 4 Ti 0 0 0 5 Ti -0 0.5 0.5 6 V 0.5 0 0.5 7 Zr 0.5 0.5 -0	418.965	-74.553	-1.35913
Ti2 W2 C4	Full Formula (Ti2 W2 C4) Reduced Formula: TiWC2 abc : 4.317722 4.357417 4.357417 angles: 90.000000 90.000000 90.000000 pbc : True True True Sites (8) # SP a b c --- ---- --- ---- ---- 0 C 0 0.5 -0 1 C 0.5 0 0 2 C 0 0 0.5 3 C 0.5 0.5 0.5 4 Ti 0 0 -0 5 Ti 0 0.5 0.5 6 W 0.5 -0 0.5 7 W 0.5 0.5 0	526.016	-81.4691	-1.64863
Zr1 Ti2 W1 C4	Full Formula (Zr1 Ti2 W1 C4) Reduced Formula: ZrTi2WC4 abc : 4.431823 4.432488 4.432488 angles: 90.000000 90.000000 90.000000 pbc : True True True Sites (8) # SP a b c --- ---- ---- ---- ---- 0 C -0 0.5 0 1 C 0.5 -0 0 2 C -0 -0 0.5 3 C 0.5 0.5 0.5 4 Ti -0 -0 0 5 Ti -0 0.5 0.5 6 W 0.5 0 0.5 7 Zr 0.5 0.5 -0	481.195	-78.3949	-1.52687
Zr2 Ti2 C4	Full Formula (Zr2 Ti2 C4) Reduced Formula: ZrTiC2 abc : 4.527084 4.548839 4.548839 angles: 90.000000 90.000000 90.000000 pbc : True True True Sites (8) # SP a b c --- ---- ---- ---- ---- 0 C 0 0.5 0 1 C 0.5 -0 -0 2 C 0 -0 0.5 3 C 0.5 0.5 0.5 4 Ti -0 -0 -0 5 Ti -0 0.5 0.5 6 Zr 0.5 0 0.5 7 Zr 0.5 0.5 -0	401.542	-75.2535	-1.39668
Ti1 V3 C4	Full Formula (Ti1 V3 C4) Reduced Formula: TiV3C4 abc : 4.199110 4.199110 4.199110 angles: 90.000000 90.000000 90.000000 pbc : True True True Sites (8) # SP a b c --- ---- ---- ---- ---- 0 C -0 0.5 -0 1 C 0.5 -0 -0 2 C 0 -0 0.5 3 C 0.5 0.5 0.5 4 Ti -0 0 0 5 V 0 0.5 0.5 6 V 0.5 0 0.5 7 V 0.5 0.5 0	499.627	-75.2831	-1.53039
Ti1 V2 W1 C4	Full Formula (Ti1 V2 W1 C4) Reduced Formula: TiV2WC4 abc : 4.258960 4.258960 4.264652 angles: 90.000000 90.000000 90.000000 pbc : True True True Sites (8) # SP a b c --- ---- ---- ---- ---- 0 C 0 0.5 -0 1 C 0.5 0 -0 2 C 0 -0 0.5 3 C 0.5 0.5 0.5 4 Ti 0 0 0 5 V -0 0.5 0.5 6 V 0.5 0 0.5 7 W 0.5 0.5 -0	503.417	-78.4765	-1.61706
Zr1 Ti1 V2 C4	Full Formula (Zr1 Ti1 V2 C4) Reduced Formula: ZrTi(VC2)2 abc : 4.367584 4.367584 4.335337 angles: 90.000000 90.000000 90.000000 pbc : True True True Sites (8) # SP a b c --- ---- --- --- --- 0 C 0 0.5 0 1 C 0.5 0 0 2 C 0 0 0.5 3 C 0.5 0.5 0.5 4 Ti 0 0 0 5 V 0 0.5 0.5 6 V 0.5 0 0.5 7 Zr 0.5 0.5 0	441	-74.6701	-1.40377
Ti1 V1 W2 C4	Full Formula (Ti1 V1 W2 C4) Reduced Formula: TiV(WC2)2 abc : 4.298417 4.319799 4.319799 angles: 90.000000 90.000000 90.000000 pbc : True True True Sites (8) # SP a b c --- ---- ---- ---- ---- 0 C -0 0.5 0 1 C 0.5 -0 -0 2 C 0 0 0.5 3 C 0.5 0.5 0.5 4 Ti 0 0 0 5 V 0 0.5 0.5 6 W 0.5 -0 0.5 7 W 0.5 0.5 -0	538.08	-81.495	-1.68188
Zr2 Ti1 V1 C4	Full Formula (Zr2 Ti1 V1 C4) Reduced Formula: Zr2TiVC4 abc : 4.473441 4.516118 4.516118 angles: 90.000000 90.000000 90.000000 pbc : True True True Sites (8) # SP a b c --- ---- ---- ---- ---- 0 C -0 0.5 -0 1 C 0.5 -0 -0 2 C 0 -0 0.5 3 C 0.5 0.5 0.5 4 Ti 0 0 -0 5 V -0 0.5 0.5 6 Zr 0.5 0 0.5 7 Zr 0.5 0.5 0	404.939	-75.1356	-1.41195
Ti1 W3 C4	Full Formula (Ti1 W3 C4) Reduced Formula: TiW3C4 abc : 4.359101 4.359101 4.359101 angles: 90.000000 90.000000 90.000000 pbc : True True True Sites (8) # SP a b c --- ---- ---- ---- ---- 0 C 0 0.5 0 1 C 0.5 0 0 2 C 0 -0 0.5 3 C 0.5 0.5 0.5 4 Ti -0 -0 -0 5 W -0 0.5 0.5 6 W 0.5 -0 0.5 7 W 0.5 0.5 -0	536.279	-84.2133	-1.70917
V2 Cr2 C4	Full Formula (V2 Cr2 C4) Reduced Formula: VCrC2 abc : 4.116503 4.110104 4.110104 angles: 90.000000 90.000000 90.000000 pbc : True True True Sites (8) # SP a b c --- ---- ---- ---- ---- 0 C -0 0.5 -0 1 C 0.5 0 -0 2 C -0 0 0.5 3 C 0.5 0.5 0.5 4 Cr 0 0 0 5 Cr -0 0.5 0.5 6 V 0.5 -0 0.5 7 V 0.5 0.5 0	453.527	-74.449	-1.70612
Zr1 Ti1 W2 C4	Full Formula (Zr1 Ti1 W2 C4) Reduced Formula: ZrTi(WC2)2 abc : 4.445679 4.445679 4.409706 angles: 90.000000 90.000000 90.000000 pbc : True True True Sites (8) # SP a b c --- ---- --- ---- ---- 0 C 0 0.5 0 1 C 0.5 -0 -0 2 C 0 -0 0.5 3 C 0.5 0.5 0.5 4 Ti 0 -0 -0 5 W 0 0.5 0.5 6 W 0.5 -0 0.5 7 Zr 0.5 0.5 0	473.483	-81.6681	-1.65352
Zr2 Ti1 W1 C4	Full Formula (Zr2 Ti1 W1 C4) Reduced Formula: Zr2TiWC4 abc : 4.508167 4.530136 4.530136 angles: 90.000000 90.000000 90.000000 pbc : True True True Sites (8) # SP a b c --- ---- ---- ---- --- 0 C -0 0.5 0 1 C 0.5 -0 0 2 C 0 -0 0.5 3 C 0.5 0.5 0.5 4 Ti -0 -0 0 5 W -0 0.5 0.5 6 Zr 0.5 -0 0.5 7 Zr 0.5 0.5 0	453.265	-79.0528	-1.5891
Zr3 Ti1 C4	Full Formula (Zr3 Ti1 C4) Reduced Formula: Zr3TiC4 abc : 4.630594 4.630594 4.630594 angles: 90.000000 90.000000 90.000000 pbc : True True True Sites (8) # SP a b c --- ---- ---- ---- --- 0 C -0 0.5 0 1 C 0.5 -0 0 2 C -0 -0 0.5 3 C 0.5 0.5 0.5 4 Ti -0 -0 0 5 Zr -0 0.5 0.5 6 Zr 0.5 -0 0.5 7 Zr 0.5 0.5 0	395.742	-76.4024	-1.5203
V3 W1 C4	Full Formula (V3 W1 C4) Reduced Formula: V3WC4 abc : 4.223957 4.223957 4.223957 angles: 90.000000 90.000000 90.000000 pbc : True True True Sites (8) # SP a b c --- ---- ---- ---- ---- 0 C 0 0.5 0 1 C 0.5 -0 0 2 C 0 -0 0.5 3 C 0.5 0.5 0.5 4 V -0 -0 -0 5 V 0 0.5 0.5 6 V 0.5 0 0.5 7 W 0.5 0.5 -0	458.291	-78.7455	-1.68069
Zr1 V3 C4	Full Formula (Zr1 V3 C4) Reduced Formula: ZrV3C4 abc : 4.314547 4.314547 4.314547 angles: 90.000000 90.000000 90.000000 pbc : True True True Sites (8) # SP a b c --- ---- ---- --- ---- 0 C -0 0.5 0 1 C 0.5 0 0 2 C -0 0 0.5 3 C 0.5 0.5 0.5 4 V -0 0 0 5 V -0 0.5 0.5 6 V 0.5 0 0.5 7 Zr 0.5 0.5 -0	444.942	-74.8867	-1.46084
V2 W2 C4	Full Formula (V2 W2 C4) Reduced Formula: VWC2 abc : 4.269470 4.287694 4.287694 angles: 90.000000 90.000000 90.000000 pbc : True True True Sites (8) # SP a b c --- ---- ---- ---- ---- 0 C -0 0.5 -0 1 C 0.5 0 0 2 C 0 0 0.5 3 C 0.5 0.5 0.5 4 V -0 0 -0 5 V -0 0.5 0.5 6 W 0.5 -0 0.5 7 W 0.5 0.5 -0	538.087	-81.5531	-1.71914
Zr1 V2 W1 C4	Full Formula (Zr1 V2 W1 C4) Reduced Formula: ZrV2WC4 abc : 4.356179 4.366691 4.366691 angles: 90.000000 90.000000 90.000000 pbc : True True True Sites (8) # SP a b c --- ---- ---- ---- ---- 0 C 0 0.5 0 1 C 0.5 -0 -0 2 C -0 -0 0.5 3 C 0.5 0.5 0.5 4 V -0 -0 0 5 V -0 0.5 0.5 6 W 0.5 -0 0.5 7 Zr 0.5 0.5 -0	476.496	-78.35	-1.58125
Zr2 V2 C4	Full Formula (Zr2 V2 C4) Reduced Formula: ZrVC2 abc : 4.415444 4.486054 4.486054 angles: 90.000000 90.000000 90.000000 pbc : True True True Sites (8) # SP a b c --- ---- ---- ---- ---- 0 C 0 0.5 -0 1 C 0.5 -0 0 2 C -0 0 0.5 3 C 0.5 0.5 0.5 4 V -0 0 -0 5 V -0 0.5 0.5 6 Zr 0.5 -0 0.5 7 Zr 0.5 0.5 0	426.267	-75.0755	-1.43444
V1 W3 C4	Full Formula (V1 W3 C4) Reduced Formula: VW3C4 abc : 4.332830 4.332830 4.332830 angles: 90.000000 90.000000 90.000000 pbc : True True True Sites (8) # SP a b c --- ---- ---- ---- ---- 0 C -0 0.5 0 1 C 0.5 -0 -0 2 C 0 0 0.5 3 C 0.5 0.5 0.5 4 V 0 0 0 5 W -0 0.5 0.5 6 W 0.5 -0 0.5 7 W 0.5 0.5 -0	453.932	-84.0833	-1.72292
Zr1 V1 W2 C4	Full Formula (Zr1 V1 W2 C4) Reduced Formula: ZrV(WC2)2 abc : 4.407593 4.407593 4.397603 angles: 90.000000 90.000000 90.000000 pbc : True True True Sites (8) # SP a b c --- ---- ---- --- ---- 0 C -0 0.5 -0 1 C 0.5 0 -0 2 C -0 0 0.5 3 C 0.5 0.5 0.5 4 V -0 0 0 5 W -0 0.5 0.5 6 W 0.5 0 0.5 7 Zr 0.5 0.5 0	485.452	-81.5308	-1.66635
V1 Cr2 W1 C4	Full Formula (V1 Cr2 W1 C4) Reduced Formula: VCr2WC4 abc : 4.193847 4.187356 4.187356 angles: 90.000000 90.000000 90.000000 pbc : True True True Sites (8) # SP a b c --- ---- ---- ---- ---- 0 C -0 0.5 0 1 C 0.5 0 -0 2 C -0 0 0.5 3 C 0.5 0.5 0.5 4 Cr -0 0 0 5 Cr -0 0.5 0.5 6 V 0.5 -0 0.5 7 W 0.5 0.5 -0	480.748	-77.2342	-1.74177
Zr2 V1 W1 C4	Full Formula (Zr2 V1 W1 C4) Reduced Formula: Zr2VWC4 abc : 4.466118 4.503906 4.503906 angles: 90.000000 90.000000 90.000000 pbc : True True True Sites (8) # SP a b c --- ---- ---- ---- --- 0 C -0 0.5 0 1 C 0.5 0 0 2 C -0 -0 0.5 3 C 0.5 0.5 0.5 4 V -0 -0 0 5 W -0 0.5 0.5 6 Zr 0.5 0 0.5 7 Zr 0.5 0.5 0	429.744	-78.8341	-1.59176
Zr3 V1 C4	Full Formula (Zr3 V1 C4) Reduced Formula: Zr3VC4 abc : 4.595022 4.595022 4.595022 angles: 90.000000 90.000000 90.000000 pbc : True True True Sites (8) # SP a b c --- ---- ---- --- ---- 0 C -0 0.5 -0 1 C 0.5 0 -0 2 C -0 0 0.5 3 C 0.5 0.5 0.5 4 V -0 0 -0 5 Zr -0 0.5 0.5 6 Zr 0.5 0 0.5 7 Zr 0.5 0.5 -0	388.774	-76.1026	-1.51282
Zr1 W3 C4	Full Formula (Zr1 W3 C4) Reduced Formula: ZrW3C4 abc : 4.441221 4.441221 4.441221 angles: 90.000000 90.000000 90.000000 pbc : True True True Sites (8) # SP a b c --- ---- --- ---- ---- 0 C 0 0.5 -0 1 C 0.5 0 -0 2 C 0 0 0.5 3 C 0.5 0.5 0.5 4 W 0 0 0 5 W 0 0.5 0.5 6 W 0.5 -0 0.5 7 Zr 0.5 0.5 -0	514.151	-84.4477	-1.71847
Zr2 W2 C4	Full Formula (Zr2 W2 C4) Reduced Formula: ZrWC2 abc : 4.480836 4.534625 4.534625 angles: 90.000000 90.000000 90.000000 pbc : True True True Sites (8) # SP a b c --- ---- ---- ---- --- 0 C -0 0.5 0 1 C 0.5 0 0 2 C -0 -0 0.5 3 C 0.5 0.5 0.5 4 W -0 -0 0 5 W -0 0.5 0.5 6 Zr 0.5 0 0.5 7 Zr 0.5 0.5 0	474.446	-82.2545	-1.70682
Zr3 W1 C4	Full Formula (Zr3 W1 C4) Reduced Formula: Zr3WC4 abc : 4.605580 4.605580 4.605580 angles: 90.000000 90.000000 90.000000 pbc : True True True Sites (8) # SP a b c --- ---- ---- ---- ---- 0 C -0 0.5 -0 1 C 0.5 -0 -0 2 C -0 -0 0.5 3 C 0.5 0.5 0.5 4 W -0 -0 -0 5 Zr 0 0.5 0.5 6 Zr 0.5 -0 0.5 7 Zr 0.5 0.5 -0	441.339	-80.0401	-1.69251
Ti1 Cr3 C4	Full Formula (Ti1 Cr3 C4) Reduced Formula: TiCr3C4 abc : 4.135808 4.135808 4.135808 angles: 90.000000 90.000000 90.000000 pbc : True True True Sites (8) # SP a b c --- ---- ---- ---- ---- 0 C 0 0.5 0 1 C 0.5 -0 -0 2 C 0 -0 0.5 3 C 0.5 0.5 0.5 4 Cr -0 0 -0 5 Cr 0 0.5 0.5 6 Cr 0.5 0 0.5 7 Ti 0.5 0.5 0	420.028	-73.1898	-1.64373
Zr1 V1 Cr2 C4	Full Formula (Zr1 V1 Cr2 C4) Reduced Formula: ZrV(CrC2)2 abc : 4.264093 4.283031 4.283031 angles: 90.000000 90.000000 90.000000 pbc : True True True Sites (8) # SP a b c --- ---- ---- ---- ---- 0 C 0 0.5 -0 1 C 0.5 -0 0 2 C -0 -0 0.5 3 C 0.5 0.5 0.5 4 Cr 0 -0 0 5 Cr 0 0.5 0.5 6 V 0.5 0 0.5 7 Zr 0.5 0.5 -0	405.551	-73.2338	-1.50422
Cr2 W2 C4	Full Formula (Cr2 W2 C4) Reduced Formula: CrWC2 abc : 4.247301 4.257140 4.257140 angles: 90.000000 90.000000 90.000000 pbc : True True True Sites (8) # SP a b c --- ---- ---- ---- ---- 0 C -0 0.5 0 1 C 0.5 -0 0 2 C 0 -0 0.5 3 C 0.5 0.5 0.5 4 Cr 0 -0 0 5 Cr 0 0.5 0.5 6 W 0.5 -0 0.5 7 W 0.5 0.5 -0	426.81	-79.9037	-1.76296
Zr1 Cr2 W1 C4	Full Formula (Zr1 Cr2 W1 C4) Reduced Formula: ZrCr2WC4 abc : 4.320083 4.339193 4.339193 angles: 90.000000 90.000000 90.000000 pbc : True True True Sites (8) # SP a b c --- ---- ---- ---- ---- 0 C 0 0.5 0 1 C 0.5 0 0 2 C -0 0 0.5 3 C 0.5 0.5 0.5 4 Cr -0 0 -0 5 Cr 0 0.5 0.5 6 W 0.5 -0 0.5 7 Zr 0.5 0.5 0	423.69	-76.6325	-1.61657
Zr2 Cr2 C4	Full Formula (Zr2 Cr2 C4) Reduced Formula: ZrCrC2 abc : 4.357991 4.465949 4.465949 angles: 90.000000 90.000000 90.000000 pbc : True True True Sites (8) # SP a b c --- ---- ---- ---- ---- 0 C -0 0.5 -0 1 C 0.5 0 0 2 C -0 0 0.5 3 C 0.5 0.5 0.5 4 Cr 0 0 -0 5 Cr -0 0.5 0.5 6 Zr 0.5 -0 0.5 7 Zr 0.5 0.5 0	368.931	-73.1278	-1.44098
Hf3 Cr1 C4	Full Formula (Hf3 Cr1 C4) Reduced Formula: Hf3CrC4 abc : 4.540726 4.540726 4.540726 angles: 90.000000 90.000000 90.000000 pbc : True True True Sites (8) # SP a b c --- ---- ---- ---- ---- 0 C 0 0.5 0 1 C 0.5 0 0 2 C -0 0 0.5 3 C 0.5 0.5 0.5 4 Cr -0 -0 -0 5 Hf -0 0.5 0.5 6 Hf 0.5 -0 0.5 7 Hf 0.5 0.5 -0	419.229	-79.9675	-1.70844
Hf2 Cr1 Mo1 C4	Full Formula (Hf2 Cr1 Mo1 C4) Reduced Formula: Hf2CrMoC4 abc : 4.471930 4.471930 4.428958 angles: 90.000000 90.000000 90.000000 pbc : True True True Sites (8) # SP a b c --- ---- --- ---- --- 0 C 0 0.5 0 1 C 0.5 -0 0 2 C 0 -0 0.5 3 C 0.5 0.5 0.5 4 Cr 0 -0 0 5 Hf 0 0.5 0.5 6 Hf 0.5 -0 0.5 7 Mo 0.5 0.5 0	446.135	-79.1108	-1.50135
Hf2 Nb1 Cr1 C4	Full Formula (Hf2 Nb1 Cr1 C4) Reduced Formula: Hf2NbCrC4 abc : 4.504955 4.504955 4.472655 angles: 90.000000 90.000000 90.000000 pbc : True True True Sites (8) # SP a b c --- ---- ---- ---- ---- 0 C -0 0.5 0 1 C 0.5 -0 0 2 C -0 -0 0.5 3 C 0.5 0.5 0.5 4 Cr -0 -0 0 5 Hf -0 0.5 0.5 6 Hf 0.5 -0 0.5 7 Nb 0.5 0.5 -0	445.714	-79.7893	-1.74866
Hf2 Ta1 Cr1 C4	Full Formula (Hf2 Ta1 Cr1 C4) Reduced Formula: Hf2TaCrC4 abc : 4.503833 4.503833 4.467318 angles: 90.000000 90.000000 90.000000 pbc : True True True Sites (8) # SP a b c --- ---- ---- ---- ---- 0 C -0 0.5 0 1 C 0.5 -0 0 2 C 0 0 0.5 3 C 0.5 0.5 0.5 4 Cr -0 -0 -0 5 Hf -0 0.5 0.5 6 Hf 0.5 -0 0.5 7 Ta 0.5 0.5 -0	460.651	-81.6189	-1.97736
Hf2 Ti1 Cr1 C4	Full Formula (Hf2 Ti1 Cr1 C4) Reduced Formula: Hf2TiCrC4 abc : 4.475837 4.475837 4.434592 angles: 90.000000 90.000000 90.000000 pbc : True True True Sites (8) # SP a b c --- ---- ---- ---- --- 0 C -0 0.5 0 1 C 0.5 -0 0 2 C 0 0 0.5 3 C 0.5 0.5 0.5 4 Cr 0 -0 0 5 Hf 0 0.5 0.5 6 Hf 0.5 -0 0.5 7 Ti 0.5 0.5 0	417.281	-77.4563	-1.55204
V1 Cr3 C4	Full Formula (V1 Cr3 C4) Reduced Formula: VCr3C4 abc : 4.090812 4.090812 4.090812 angles: 90.000000 90.000000 90.000000 pbc : True True True Sites (8) # SP a b c --- ---- ---- ---- ---- 0 C 0 0.5 -0 1 C 0.5 -0 0 2 C 0 -0 0.5 3 C 0.5 0.5 0.5 4 Cr 0 -0 0 5 Cr -0 0.5 0.5 6 Cr 0.5 0 0.5 7 V 0.5 0.5 0	418.855	-73.8513	-1.75642
Hf2 V1 Cr1 C4	Full Formula (Hf2 V1 Cr1 C4) Reduced Formula: Hf2VCrC4 abc : 4.445509 4.445509 4.377900 angles: 90.000000 90.000000 90.000000 pbc : True True True Sites (8) # SP a b c --- ---- ---- --- ---- 0 C -0 0.5 0 1 C 0.5 0 0 2 C -0 0 0.5 3 C 0.5 0.5 0.5 4 Cr -0 0 -0 5 Hf -0 0.5 0.5 6 Hf 0.5 0 0.5 7 V 0.5 0.5 0	422.276	-77.5782	-1.59727
Hf2 Cr1 W1 C4	Full Formula (Hf2 Cr1 W1 C4) Reduced Formula: Hf2CrWC4 abc : 4.468528 4.468528 4.425724 angles: 90.000000 90.000000 90.000000 pbc : True True True Sites (8) # SP a b c --- ---- ---- --- ---- 0 C -0 0.5 0 1 C 0.5 0 0 2 C -0 0 0.5 3 C 0.5 0.5 0.5 4 Cr -0 0 -0 5 Hf -0 0.5 0.5 6 Hf 0.5 0 0.5 7 W 0.5 0.5 -0	467.192	-81.3248	-1.7531
Hf2 Zr1 Cr1 C4	Full Formula (Hf2 Zr1 Cr1 C4) Reduced Formula: Hf2ZrCrC4 abc : 4.550377 4.550377 4.564015 angles: 90.000000 90.000000 90.000000 pbc : True True True Sites (8) # SP a b c --- ---- ---- ---- ---- 0 C -0 0.5 -0 1 C 0.5 -0 -0 2 C -0 -0 0.5 3 C 0.5 0.5 0.5 4 Cr -0 -0 0 5 Hf -0 0.5 0.5 6 Hf 0.5 -0 0.5 7 Zr 0.5 0.5 0	402.392	-78.2478	-1.63097
Hf1 Cr1 Mo2 C4	Full Formula (Hf1 Cr1 Mo2 C4) Reduced Formula: HfCr(MoC2)2 abc : 4.381426 4.384318 4.384318 angles: 90.000000 90.000000 90.000000 pbc : True True True Sites (8) # SP a b c --- ---- ---- ---- ---- 0 C 0 0.5 0 1 C 0.5 0 -0 2 C 0 -0 0.5 3 C 0.5 0.5 0.5 4 Cr -0 -0 0 5 Hf -0 0.5 0.5 6 Mo 0.5 0 0.5 7 Mo 0.5 0.5 -0	447.787	-78.2572	-1.29465
Hf1 Nb2 Cr1 C4	Full Formula (Hf1 Nb2 Cr1 C4) Reduced Formula: HfNb2CrC4 abc : 4.455108 4.445990 4.445990 angles: 90.000000 90.000000 90.000000 pbc : True True True Sites (8) # SP a b c --- ---- ---- ---- --- 0 C -0 0.5 0 1 C 0.5 -0 0 2 C -0 -0 0.5 3 C 0.5 0.5 0.5 4 Cr -0 -0 0 5 Hf 0 0.5 0.5 6 Nb 0.5 -0 0.5 7 Nb 0.5 0.5 0	469.502	-79.5731	-1.78414
Hf1 Ta2 Cr1 C4	Full Formula (Hf1 Ta2 Cr1 C4) Reduced Formula: HfTa2CrC4 abc : 4.453579 4.442550 4.442550 angles: 90.000000 90.000000 90.000000 pbc : True True True Sites (8) # SP a b c --- ---- ---- ---- ---- 0 C 0 0.5 0 1 C 0.5 -0 -0 2 C -0 0 0.5 3 C 0.5 0.5 0.5 4 Cr 0 0 0 5 Hf -0 0.5 0.5 6 Ta 0.5 -0 0.5 7 Ta 0.5 0.5 -0	494.836	-83.1747	-2.23434
Hf1 Ti2 Cr1 C4	Full Formula (Hf1 Ti2 Cr1 C4) Reduced Formula: HfTi2CrC4 abc : 4.390822 4.363261 4.363261 angles: 90.000000 90.000000 90.000000 pbc : True True True Sites (8) # SP a b c --- ---- ---- ---- ---- 0 C 0 0.5 0 1 C 0.5 0 0 2 C 0 0 0.5 3 C 0.5 0.5 0.5 4 Cr -0 0 0 5 Hf 0 0.5 0.5 6 Ti 0.5 -0 0.5 7 Ti 0.5 0.5 -0	424.167	-75.2535	-1.43419
Hf1 V2 Cr1 C4	Full Formula (Hf1 V2 Cr1 C4) Reduced Formula: HfV2CrC4 abc : 4.298792 4.282057 4.282057 angles: 90.000000 90.000000 90.000000 pbc : True True True Sites (8) # SP a b c --- ---- ---- ---- ---- 0 C 0 0.5 0 1 C 0.5 0 0 2 C -0 0 0.5 3 C 0.5 0.5 0.5 4 Cr 0 -0 -0 5 Hf 0 0.5 0.5 6 V 0.5 -0 0.5 7 V 0.5 0.5 -0	442.565	-75.8571	-1.56963
Hf1 Cr1 W2 C4	Full Formula (Hf1 Cr1 W2 C4) Reduced Formula: HfCr(WC2)2 abc : 4.376124 4.385062 4.385062 angles: 90.000000 90.000000 90.000000 pbc : True True True Sites (8) # SP a b c --- ---- ---- ---- ---- 0 C 0 0.5 0 1 C 0.5 0 0 2 C -0 0 0.5 3 C 0.5 0.5 0.5 4 Cr -0 0 0 5 Hf 0 0.5 0.5 6 W 0.5 -0 0.5 7 W 0.5 0.5 -0	478.078	-82.4315	-1.76644
Cr3 W1 C4	Full Formula (Cr3 W1 C4) Reduced Formula: Cr3WC4 abc : 4.172464 4.172464 4.172464 angles: 90.000000 90.000000 90.000000 pbc : True True True Sites (8) # SP a b c --- ---- ---- ---- ---- 0 C 0 0.5 -0 1 C 0.5 0 -0 2 C -0 0 0.5 3 C 0.5 0.5 0.5 4 Cr 0 -0 -0 5 Cr 0 0.5 0.5 6 Cr 0.5 0 0.5 7 W 0.5 0.5 -0	436.853	-76.5224	-1.7778
Hf1 Zr2 Cr1 C4	Full Formula (Hf1 Zr2 Cr1 C4) Reduced Formula: HfZr2CrC4 abc : 4.559879 4.574262 4.574262 angles: 90.000000 90.000000 90.000000 pbc : True True True Sites (8) # SP a b c --- ---- --- --- ---- 0 C 0 0.5 -0 1 C 0.5 0 -0 2 C 0 0 0.5 3 C 0.5 0.5 0.5 4 Cr 0 0 -0 5 Hf 0 0.5 0.5 6 Zr 0.5 0 0.5 7 Zr 0.5 0.5 -0	386.75	-76.5475	-1.55594
Cr1 Mo3 C4	Full Formula (Cr1 Mo3 C4) Reduced Formula: CrMo3C4 abc : 4.316613 4.316613 4.316613 angles: 90.000000 90.000000 90.000000 pbc : True True True Sites (8) # SP a b c --- ---- ---- ---- ---- 0 C 0 0.5 0 1 C 0.5 0 0 2 C -0 0 0.5 3 C 0.5 0.5 0.5 4 Cr -0 -0 -0 5 Mo 0 0.5 0.5 6 Mo 0.5 0 0.5 7 Mo 0.5 0.5 0	421.036	-77.3226	-1.07783
Nb1 Cr1 Mo2 C4	Full Formula (Nb1 Cr1 Mo2 C4) Reduced Formula: NbCr(MoC2)2 abc : 4.344943 4.344943 4.342922 angles: 90.000000 90.000000 90.000000 pbc : True True True Sites (8) # SP a b c --- ---- --- ---- --- 0 C 0 0.5 0 1 C 0.5 -0 0 2 C 0 -0 0.5 3 C 0.5 0.5 0.5 4 Cr 0 -0 0 5 Mo 0 0.5 0.5 6 Mo 0.5 -0 0.5 7 Nb 0.5 0.5 0	445.773	-77.9637	-1.32047
Ta1 Cr1 Mo2 C4	Full Formula (Ta1 Cr1 Mo2 C4) Reduced Formula: TaCr(MoC2)2 abc : 4.347450 4.347450 4.345327 angles: 90.000000 90.000000 90.000000 pbc : True True True Sites (8) # SP a b c --- ---- ---- --- ---- 0 C -0 0.5 0 1 C 0.5 0 0 2 C -0 0 0.5 3 C 0.5 0.5 0.5 4 Cr -0 0 -0 5 Mo -0 0.5 0.5 6 Mo 0.5 0 0.5 7 Ta 0.5 0.5 -0	462.083	-79.7008	-1.53759
Ti1 Cr1 Mo2 C4	Full Formula (Ti1 Cr1 Mo2 C4) Reduced Formula: TiCr(MoC2)2 abc : 4.303682 4.303682 4.283750 angles: 90.000000 90.000000 90.000000 pbc : True True True Sites (8) # SP a b c --- ---- ---- --- ---- 0 C -0 0.5 -0 1 C 0.5 0 -0 2 C -0 0 0.5 3 C 0.5 0.5 0.5 4 Cr -0 0 -0 5 Mo -0 0.5 0.5 6 Mo 0.5 0 0.5 7 Ti 0.5 0.5 0	462.394	-76.4328	-1.2241
V1 Cr1 Mo2 C4	Full Formula (V1 Cr1 Mo2 C4) Reduced Formula: VCr(MoC2)2 abc : 4.269947 4.269947 4.249972 angles: 90.000000 90.000000 90.000000 pbc : True True True Sites (8) # SP a b c --- ---- ---- ---- ---- 0 C 0 0.5 -0 1 C 0.5 -0 -0 2 C 0 0 0.5 3 C 0.5 0.5 0.5 4 Cr -0 -0 0 5 Mo 0 0.5 0.5 6 Mo 0.5 -0 0.5 7 V 0.5 0.5 0	457.878	-76.551	-1.26888
Cr1 Mo2 W1 C4	Full Formula (Cr1 Mo2 W1 C4) Reduced Formula: CrMo2WC4 abc : 4.318396 4.318396 4.317136 angles: 90.000000 90.000000 90.000000 pbc : True True True Sites (8) # SP a b c --- ---- ---- ---- ---- 0 C -0 0.5 0 1 C 0.5 0 0 2 C -0 -0 0.5 3 C 0.5 0.5 0.5 4 Cr -0 -0 -0 5 Mo -0 0.5 0.5 6 Mo 0.5 0 0.5 7 W 0.5 0.5 -0	411.649	-79.3173	-1.30216
Zr1 Cr1 Mo2 C4	Full Formula (Zr1 Cr1 Mo2 C4) Reduced Formula: ZrCr(MoC2)2 abc : 4.392940 4.392940 4.395178 angles: 90.000000 90.000000 90.000000 pbc : True True True Sites (8) # SP a b c --- ---- --- ---- ---- 0 C 0 0.5 0 1 C 0.5 -0 0 2 C 0 -0 0.5 3 C 0.5 0.5 0.5 4 Cr 0 -0 0 5 Mo 0 0.5 0.5 6 Mo 0.5 -0 0.5 7 Zr 0.5 0.5 -0	427.965	-76.5081	-1.21352
Nb2 Cr1 Mo1 C4	Full Formula (Nb2 Cr1 Mo1 C4) Reduced Formula: Nb2CrMoC4 abc : 4.376096 4.373241 4.373241 angles: 90.000000 90.000000 90.000000 pbc : True True True Sites (8) # SP a b c --- ---- ---- ---- ---- 0 C -0 0.5 0 1 C 0.5 -0 0 2 C -0 -0 0.5 3 C 0.5 0.5 0.5 4 Cr -0 -0 0 5 Mo -0 0.5 0.5 6 Nb 0.5 -0 0.5 7 Nb 0.5 0.5 -0	465.69	-78.6189	-1.56486
Zr1 Cr3 C4	Full Formula (Zr1 Cr3 C4) Reduced Formula: ZrCr3C4 abc : 4.257007 4.257007 4.257007 angles: 90.000000 90.000000 90.000000 pbc : True True True Sites (8) # SP a b c --- ---- --- ---- ---- 0 C 0 0.5 -0 1 C 0.5 -0 -0 2 C 0 -0 0.5 3 C 0.5 0.5 0.5 4 Cr 0 -0 -0 5 Cr 0 0.5 0.5 6 Cr 0.5 -0 0.5 7 Zr 0.5 0.5 0	373.667	-72.4695	-1.53369
Ta2 Cr1 Mo1 C4	Full Formula (Ta2 Cr1 Mo1 C4) Reduced Formula: Ta2CrMoC4 abc : 4.383217 4.373230 4.373230 angles: 90.000000 90.000000 90.000000 pbc : True True True Sites (8) # SP a b c --- ---- ---- ---- ---- 0 C -0 0.5 0 1 C 0.5 -0 -0 2 C 0 -0 0.5 3 C 0.5 0.5 0.5 4 Cr -0 -0 0 5 Mo 0 0.5 0.5 6 Ta 0.5 0 0.5 7 Ta 0.5 0.5 -0	485.427	-82.133	-2.00413
Ti2 Cr1 Mo1 C4	Full Formula (Ti2 Cr1 Mo1 C4) Reduced Formula: Ti2CrMoC4 abc : 4.269329 4.287045 4.287045 angles: 90.000000 90.000000 90.000000 pbc : True True True Sites (8) # SP a b c --- ---- ---- ---- ---- 0 C -0 0.5 -0 1 C 0.5 -0 0 2 C -0 0 0.5 3 C 0.5 0.5 0.5 4 Cr 0 0 -0 5 Mo 0 0.5 0.5 6 Ti 0.5 0 0.5 7 Ti 0.5 0.5 -0	469.497	-75.1512	-1.3214
V2 Cr1 Mo1 C4	Full Formula (V2 Cr1 Mo1 C4) Reduced Formula: V2CrMoC4 abc : 4.207677 4.200635 4.200635 angles: 90.000000 90.000000 90.000000 pbc : True True True Sites (8) # SP a b c --- ---- ---- ---- ---- 0 C 0 0.5 -0 1 C 0.5 0 -0 2 C 0 -0 0.5 3 C 0.5 0.5 0.5 4 Cr 0 -0 -0 5 Mo -0 0.5 0.5 6 V 0.5 -0 0.5 7 V 0.5 0.5 0	474.355	-75.7811	-1.46013
Cr1 Mo1 W2 C4	Full Formula (Cr1 Mo1 W2 C4) Reduced Formula: CrMo(WC2)2 abc : 4.323951 4.317018 4.317018 angles: 90.000000 90.000000 90.000000 pbc : True True True Sites (8) # SP a b c --- ---- ---- ---- ---- 0 C 0 0.5 -0 1 C 0.5 0 0 2 C -0 -0 0.5 3 C 0.5 0.5 0.5 4 Cr 0 -0 -0 5 Mo -0 0.5 0.5 6 W 0.5 0 0.5 7 W 0.5 0.5 0	430.686	-81.3134	-1.52667
Zr2 Cr1 Mo1 C4	Full Formula (Zr2 Cr1 Mo1 C4) Reduced Formula: Zr2CrMoC4 abc : 4.442888 4.502148 4.502148 angles: 90.000000 90.000000 90.000000 pbc : True True True Sites (8) # SP a b c --- ---- ---- ---- ---- 0 C 0 0.5 0 1 C 0.5 0 0 2 C -0 0 0.5 3 C 0.5 0.5 0.5 4 Cr 0 0 0 5 Mo -0 0.5 0.5 6 Zr 0.5 -0 0.5 7 Zr 0.5 0.5 -0	415.109	-75.6788	-1.34736
Nb3 Cr1 C4	Full Formula (Nb3 Cr1 C4) Reduced Formula: Nb3CrC4 abc : 4.405803 4.405803 4.405803 angles: 90.000000 90.000000 90.000000 pbc : True True True Sites (8) # SP a b c --- ---- ---- ---- ---- 0 C -0 0.5 -0 1 C 0.5 -0 -0 2 C -0 -0 0.5 3 C 0.5 0.5 0.5 4 Cr -0 -0 -0 5 Nb 0 0.5 0.5 6 Nb 0.5 0 0.5 7 Nb 0.5 0.5 0	466.197	-79.3113	-1.81391
Ta1 Nb2 Cr1 C4	Full Formula (Ta1 Nb2 Cr1 C4) Reduced Formula: TaNb2CrC4 abc : 4.406838 4.406838 4.403372 angles: 90.000000 90.000000 90.000000 pbc : True True True Sites (8) # SP a b c --- ---- ---- ---- ---- 0 C -0 0.5 -0 1 C 0.5 -0 -0 2 C -0 -0 0.5 3 C 0.5 0.5 0.5 4 Cr -0 -0 -0 5 Nb -0 0.5 0.5 6 Nb 0.5 -0 0.5 7 Ta 0.5 0.5 -0	478.694	-81.0744	-2.03429
Ti1 Nb2 Cr1 C4	Full Formula (Ti1 Nb2 Cr1 C4) Reduced Formula: TiNb2CrC4 abc : 4.369842 4.369842 4.355360 angles: 90.000000 90.000000 90.000000 pbc : True True True Sites (8) # SP a b c --- ---- ---- ---- --- 0 C 0 0.5 0 1 C 0.5 -0 0 2 C -0 -0 0.5 3 C 0.5 0.5 0.5 4 Cr -0 -0 0 5 Nb -0 0.5 0.5 6 Nb 0.5 0 0.5 7 Ti 0.5 0.5 0	476.332	-77.4654	-1.67818
Hf2 Cr2 C4	Full Formula (Hf2 Cr2 C4) Reduced Formula: HfCrC2 abc : 4.353833 4.433583 4.433583 angles: 90.000000 90.000000 90.000000 pbc : True True True Sites (8) # SP a b c --- ---- ---- ---- ---- 0 C -0 0.5 -0 1 C 0.5 0 -0 2 C -0 -0 0.5 3 C 0.5 0.5 0.5 4 Cr 0 -0 -0 5 Cr 0 0.5 0.5 6 Hf 0.5 0 0.5 7 Hf 0.5 0.5 -0	398.269	-76.6246	-1.60307
Nb2 V1 Cr1 C4	Full Formula (Nb2 V1 Cr1 C4) Reduced Formula: Nb2VCrC4 abc : 4.336109 4.336109 4.312100 angles: 90.000000 90.000000 90.000000 pbc : True True True Sites (8) # SP a b c --- ---- ---- ---- --- 0 C 0 0.5 0 1 C 0.5 -0 0 2 C -0 0 0.5 3 C 0.5 0.5 0.5 4 Cr 0 0 0 5 Nb -0 0.5 0.5 6 Nb 0.5 0 0.5 7 V 0.5 0.5 0	468.553	-77.5695	-1.72119
Nb2 Cr1 W1 C4	Full Formula (Nb2 Cr1 W1 C4) Reduced Formula: Nb2CrWC4 abc : 4.372968 4.372968 4.372869 angles: 90.000000 90.000000 90.000000 pbc : True True True Sites (8) # SP a b c --- ---- ---- ---- --- 0 C 0 0.5 0 1 C 0.5 -0 0 2 C 0 -0 0.5 3 C 0.5 0.5 0.5 4 Cr 0 -0 0 5 Nb -0 0.5 0.5 6 Nb 0.5 -0 0.5 7 W 0.5 0.5 0	488.678	-80.7076	-1.80095
Zr1 Nb2 Cr1 C4	Full Formula (Zr1 Nb2 Cr1 C4) Reduced Formula: ZrNb2CrC4 abc : 4.455813 4.455813 4.472998 angles: 90.000000 90.000000 90.000000 pbc : True True True Sites (8) # SP a b c --- ---- --- ---- ---- 0 C 0 0.5 0 1 C 0.5 -0 0 2 C 0 -0 0.5 3 C 0.5 0.5 0.5 4 Cr 0 -0 0 5 Nb 0 0.5 0.5 6 Nb 0.5 -0 0.5 7 Zr 0.5 0.5 -0	450.015	-77.8257	-1.70322
Ta2 Nb1 Cr1 C4	Full Formula (Ta2 Nb1 Cr1 C4) Reduced Formula: Ta2NbCrC4 abc : 4.408997 4.404028 4.404028 angles: 90.000000 90.000000 90.000000 pbc : True True True Sites (8) # SP a b c --- ---- ---- ---- ---- 0 C -0 0.5 0 1 C 0.5 -0 -0 2 C -0 -0 0.5 3 C 0.5 0.5 0.5 4 Cr -0 -0 0 5 Nb 0 0.5 0.5 6 Ta 0.5 -0 0.5 7 Ta 0.5 0.5 -0	491.161	-82.8457	-2.25571
Ti2 Nb1 Cr1 C4	Full Formula (Ti2 Nb1 Cr1 C4) Reduced Formula: Ti2NbCrC4 abc : 4.315419 4.322902 4.322902 angles: 90.000000 90.000000 90.000000 pbc : True True True Sites (8) # SP a b c --- ---- ---- ---- ---- 0 C 0 0.5 -0 1 C 0.5 -0 0 2 C 0 -0 0.5 3 C 0.5 0.5 0.5 4 Cr 0 0 -0 5 Nb -0 0.5 0.5 6 Ti 0.5 -0 0.5 7 Ti 0.5 0.5 0	458.913	-75.4902	-1.52627
Nb1 V2 Cr1 C4	Full Formula (Nb1 V2 Cr1 C4) Reduced Formula: NbV2CrC4 abc : 4.241200 4.235606 4.235606 angles: 90.000000 90.000000 90.000000 pbc : True True True Sites (8) # SP a b c --- ---- ---- ---- ---- 0 C 0 0.5 -0 1 C 0.5 -0 0 2 C -0 0 0.5 3 C 0.5 0.5 0.5 4 Cr 0 0 -0 5 Nb -0 0.5 0.5 6 V 0.5 0 0.5 7 V 0.5 0.5 -0	484.701	-76.1101	-1.66376
Nb1 Cr1 W2 C4	Full Formula (Nb1 Cr1 W2 C4) Reduced Formula: NbCr(WC2)2 abc : 4.342165 4.346046 4.346046 angles: 90.000000 90.000000 90.000000 pbc : True True True Sites (8) # SP a b c --- ---- ---- ---- ---- 0 C 0 0.5 0 1 C 0.5 0 -0 2 C -0 -0 0.5 3 C 0.5 0.5 0.5 4 Cr -0 -0 -0 5 Nb -0 0.5 0.5 6 W 0.5 0 0.5 7 W 0.5 0.5 -0	493.314	-82.0277	-1.77846
Zr2 Nb1 Cr1 C4	Full Formula (Zr2 Nb1 Cr1 C4) Reduced Formula: Zr2NbCrC4 abc : 4.490699 4.536636 4.536636 angles: 90.000000 90.000000 90.000000 pbc : True True True Sites (8) # SP a b c --- ---- ---- ---- ---- 0 C -0 0.5 0 1 C 0.5 0 0 2 C 0 0 0.5 3 C 0.5 0.5 0.5 4 Cr -0 0 0 5 Nb 0 0.5 0.5 6 Zr 0.5 -0 0.5 7 Zr 0.5 0.5 -0	414.023	-76.3484	-1.59355
Cr4 C4	Full Formula (Cr4 C4) Reduced Formula: CrC abc : 4.067512 4.067512 4.067512 angles: 90.000000 90.000000 90.000000 pbc : True True True Sites (8) # SP a b c --- ---- ---- ---- ---- 0 Cr 0 0 0.5 1 Cr 0 0.5 -0 2 Cr 0.5 0 0 3 Cr 0.5 0.5 0.5 4 C -0 0 -0 5 C 0 0.5 0.5 6 C 0.5 -0 0.5 7 C 0.5 0.5 -0	427.712	-73.2793	-1.80991
Hf4 C4	Full Formula (Hf4 C4) Reduced Formula: HfC abc : 4.646031 4.646031 4.646031 angles: 90.000000 90.000000 90.000000 pbc : True True True Sites (8) # SP a b c --- ---- ---- ---- ---- 0 Hf -0 0 -0 1 Hf 0 0.5 0.5 2 Hf 0.5 -0 0.5 3 Hf 0.5 0.5 -0 4 C 0 -0 0.5 5 C 0 0.5 -0 6 C 0.5 0 0 7 C 0.5 0.5 0.5	452.363	-84.4121	-1.95151
Mo4 C4	Full Formula (Mo4 C4) Reduced Formula: MoC abc : 4.374839 4.374839 4.374839 angles: 90.000000 90.000000 90.000000 pbc : True True True Sites (8) # SP a b c --- ---- ---- ---- ---- 0 Mo 0.5 0 0 1 Mo 0.5 0.5 0.5 2 Mo 0 -0 0.5 3 Mo -0 0.5 -0 4 C -0 -0 -0 5 C -0 0.5 0.5 6 C 0.5 0 0.5 7 C 0.5 0.5 0	420.016	-78.985	-0.873119
Nb4 C4	Full Formula (Nb4 C4) Reduced Formula: NbC abc : 4.482521 4.482521 4.482521 angles: 90.000000 90.000000 90.000000 pbc : True True True Sites (8) # SP a b c --- ---- ---- ---- ---- 0 Nb 0 -0 0 1 Nb 0 0.5 0.5 2 Nb 0.5 0 0.5 3 Nb 0.5 0.5 -0 4 C -0 -0 0.5 5 C -0 0.5 -0 6 C 0.5 -0 -0 7 C 0.5 0.5 0.5	436.194	-82.1438	-1.91798
Ta4 C4	Full Formula (Ta4 C4) Reduced Formula: TaC abc : 4.474995 4.474995 4.474995 angles: 90.000000 90.000000 90.000000 pbc : True True True Sites (8) # SP a b c --- ---- ---- ---- ---- 0 Ta -0 -0 0 1 Ta -0 0.5 0.5 2 Ta 0.5 0 0.5 3 Ta 0.5 0.5 -0 4 C 0 0.5 0 5 C 0 0 0.5 6 C 0.5 0.5 0.5 7 C 0.5 0 -0	421.974	-88.9872	-2.77341
Ti4 C4	Full Formula (Ti4 C4) Reduced Formula: TiC abc : 4.336481 4.336481 4.336481 angles: 90.000000 90.000000 90.000000 pbc : True True True Sites (8) # SP a b c --- ---- ---- ---- ---- 0 Ti 0 -0 0 1 Ti 0 0.5 0.5 2 Ti 0.5 0 0.5 3 Ti 0.5 0.5 -0 4 C -0 0 0.5 5 C 0 0.5 -0 6 C 0.5 -0 0 7 C 0.5 0.5 0.5	438.541	-74.1055	-1.29319
V4 C4	Full Formula (V4 C4) Reduced Formula: VC abc : 4.154077 4.154077 4.154077 angles: 90.000000 90.000000 90.000000 pbc : True True True Sites (8) # SP a b c --- ---- ---- ---- ---- 0 V 0 -0 -0 1 V 0 0.5 0.5 2 V 0.5 0 0.5 3 V 0.5 0.5 0 4 C 0.5 -0 -0 5 C 0.5 0.5 0.5 6 C -0 0 0.5 7 C -0 0.5 -0	556.297	-75.7929	-1.62412
W4 C4	Full Formula (W4 C4) Reduced Formula: WC abc : 4.377811 4.377811 4.377811 angles: 90.000000 90.000000 90.000000 pbc : True True True Sites (8) # SP a b c --- ---- ---- ---- ---- 0 W -0 0 -0 1 W -0 0.5 0.5 2 W 0.5 -0 0.5 3 W 0.5 0.5 0 4 C 0.5 0 0 5 C 0.5 0.5 0.5 6 C -0 0 0.5 7 C 0 0.5 0	424.407	-86.4387	-1.70484
Zr4 C4	Full Formula (Zr4 C4) Reduced Formula: ZrC abc : 4.709784 4.709784 4.709784 angles: 90.000000 90.000000 90.000000 pbc : True True True Sites (8) # SP a b c --- ---- ---- ---- ---- 0 Zr -0 0 0 1 Zr 0 0.5 0.5 2 Zr 0.5 -0 0.5 3 Zr 0.5 0.5 0 4 C 0 -0 0.5 5 C 0 0.5 0 6 C 0.5 0 -0 7 C 0.5 0.5 0.5	393.585	-77.8526	-1.68158
Hf1 Zr1 Ta1 V1 C4	Full Formula (Hf1 Zr1 Ta1 V1 C4) Reduced Formula: HfZrTaVC4 abc : 4.520077 4.527586 4.496202 angles: 90.000000 90.000000 90.000000 pbc : True True True Sites (8) # SP a b c --- ---- ---- ---- --- 0 C -0 0.5 0 1 C 0.5 -0 0 2 C -0 -0 0.5 3 C 0.5 0.5 0.5 4 Ta -0 -0 0 5 Zr 0 0.5 0.5 6 Hf 0.5 -0 0.5 7 V 0.5 0.5 0	460.421	-80.9761	-1.90951
Hf1 Zr1 Ta1 Nb1 C4	Full Formula (Hf1 Zr1 Ta1 Nb1 C4) Reduced Formula: HfZrTaNbC4 abc : 4.575797 4.577157 4.557780 angles: 90.000000 90.000000 90.000000 pbc : True True True Sites (8) # SP a b c --- ---- --- ---- ---- 0 C 0 0.5 -0 1 C 0.5 -0 -0 2 C 0 -0 0.5 3 C 0.5 0.5 0.5 4 Ta 0 -0 0 5 Zr 0 0.5 0.5 6 Hf 0.5 -0 0.5 7 Nb 0.5 0.5 0	481.034	-83.4093	-2.08867
Zr1 Ta1 V1 W1 C4	Full Formula (Zr1 Ta1 V1 W1 C4) Reduced Formula: ZrTaVWC4 abc : 4.424933 4.445820 4.437779 angles: 90.000000 90.000000 90.000000 pbc : True True True Sites (8) # SP a b c --- ---- ---- ---- ---- 0 C 0 0.5 -0 1 C 0.5 -0 0 2 C 0 -0 0.5 3 C 0.5 0.5 0.5 4 Ta -0 -0 -0 5 Zr 0 0.5 0.5 6 V 0.5 -0 0.5 7 W 0.5 0.5 -0	476.816	-81.9388	-1.90485
Hf1 Zr1 Cr1 Mo1 C4	Full Formula (Hf1 Zr1 Cr1 Mo1 C4) Reduced Formula: HfZrCrMoC4 abc : 4.435902 4.484301 4.489429 angles: 90.000000 90.000000 90.000000 pbc : True True True Sites (8) # SP a b c --- ---- ---- ---- ---- 0 C 0 0.5 -0 1 C 0.5 -0 -0 2 C -0 -0 0.5 3 C 0.5 0.5 0.5 4 Zr 0 -0 0 5 Hf -0 0.5 0.5 6 Mo 0.5 -0 0.5 7 Cr 0.5 0.5 0	432.305	-77.3845	-1.42306
Hf1 Zr1 Cr1 W1 C4	Full Formula (Hf1 Zr1 Cr1 W1 C4) Reduced Formula: HfZrCrWC4 abc : 4.433293 4.479247 4.486504 angles: 90.000000 90.000000 90.000000 pbc : True True True Sites (8) # SP a b c --- ---- ---- --- ---- 0 C -0 0.5 0 1 C 0.5 0 0 2 C -0 0 0.5 3 C 0.5 0.5 0.5 4 Zr 0 0 0 5 Hf -0 0.5 0.5 6 W 0.5 0 0.5 7 Cr 0.5 0.5 -0	449.937	-79.5811	-1.67263
Zr1 Ti1 Nb1 V1 C4	Full Formula (Zr1 Ti1 Nb1 V1 C4) Reduced Formula: ZrTiNbVC4 abc : 4.453377 4.427421 4.433747 angles: 90.000000 90.000000 90.000000 pbc : True True True Sites (8) # SP a b c --- ---- ---- ---- ---- 0 C -0 0.5 -0 1 C 0.5 0 -0 2 C 0 0 0.5 3 C 0.5 0.5 0.5 4 Zr 0 -0 -0 5 V -0 0.5 0.5 6 Nb 0.5 0 0.5 7 Ti 0.5 0.5 0	446.564	-76.7402	-1.53752
Zr1 Nb1 V1 Mo1 C4	Full Formula (Zr1 Nb1 V1 Mo1 C4) Reduced Formula: ZrNbVMoC4 abc : 4.442894 4.427501 4.448397 angles: 90.000000 90.000000 90.000000 pbc : True True True Sites (8) # SP a b c --- ---- ---- --- ---- 0 C -0 0.5 -0 1 C 0.5 0 0 2 C 0 0 0.5 3 C 0.5 0.5 0.5 4 Zr -0 0 -0 5 V -0 0.5 0.5 6 Nb 0.5 0 0.5 7 Mo 0.5 0.5 -0	461.287	-78.0822	-1.44777
Zr1 Nb1 V1 W1 C4	Full Formula (Zr1 Nb1 V1 W1 C4) Reduced Formula: ZrNbVWC4 abc : 4.439571 4.424384 4.446368 angles: 90.000000 90.000000 90.000000 pbc : True True True Sites (8) # SP a b c --- ---- ---- ---- ---- 0 C -0 0.5 -0 1 C 0.5 0 -0 2 C -0 0 0.5 3 C 0.5 0.5 0.5 4 Zr -0 0 -0 5 V -0 0.5 0.5 6 Nb 0.5 -0 0.5 7 W 0.5 0.5 0	467.733	-80.1906	-1.68632
Zr1 Nb1 V1 Cr1 C4	Full Formula (Zr1 Nb1 V1 Cr1 C4) Reduced Formula: ZrNbVCrC4 abc : 4.394265 4.356613 4.406318 angles: 90.000000 90.000000 90.000000 pbc : True True True Sites (8) # SP a b c --- ---- ---- ---- ---- 0 C -0 0.5 -0 1 C 0.5 -0 -0 2 C 0 -0 0.5 3 C 0.5 0.5 0.5 4 Zr 0 0 -0 5 V 0 0.5 0.5 6 Nb 0.5 -0 0.5 7 Cr 0.5 0.5 -0	437.25	-75.7967	-1.57459
Zr1 Ta1 V1 Cr1 C4	Full Formula (Zr1 Ta1 V1 Cr1 C4) Reduced Formula: ZrTaVCrC4 abc : 4.361042 4.406145 4.391957 angles: 90.000000 90.000000 90.000000 pbc : True True True Sites (8) # SP a b c --- ---- ---- ---- ---- 0 C -0 0.5 -0 1 C 0.5 -0 -0 2 C -0 -0 0.5 3 C 0.5 0.5 0.5 4 Ta -0 -0 0 5 Zr 0 0.5 0.5 6 V 0.5 -0 0.5 7 Cr 0.5 0.5 0	453.982	-77.6147	-1.80184
Zr1 Ti1 V1 Mo1 C4	Full Formula (Zr1 Ti1 V1 Mo1 C4) Reduced Formula: ZrTiVMoC4 abc : 4.411467 4.389256 4.400115 angles: 90.000000 90.000000 90.000000 pbc : True True True Sites (8) # SP a b c --- ---- ---- --- ---- 0 C 0 0.5 -0 1 C 0.5 0 0 2 C 0 0 0.5 3 C 0.5 0.5 0.5 4 Zr -0 0 -0 5 V -0 0.5 0.5 6 Ti 0.5 0 0.5 7 Mo 0.5 0.5 -0	443.41	-76.102	-1.29526
Zr1 Ti1 V1 W1 C4	Full Formula (Zr1 Ti1 V1 W1 C4) Reduced Formula: ZrTiVWC4 abc : 4.409320 4.390149 4.394136 angles: 90.000000 90.000000 90.000000 pbc : True True True Sites (8) # SP a b c --- ---- ---- --- ---- 0 C -0 0.5 0 1 C 0.5 0 -0 2 C 0 0 0.5 3 C 0.5 0.5 0.5 4 Zr 0 0 0 5 V -0 0.5 0.5 6 Ti 0.5 0 0.5 7 W 0.5 0.5 -0	470.07	-78.33	-1.54875
Zr1 Ti1 V1 Cr1 C4	Full Formula (Zr1 Ti1 V1 Cr1 C4) Reduced Formula: ZrTiVCrC4 abc : 4.345281 4.308182 4.365388 angles: 90.000000 90.000000 90.000000 pbc : True True True Sites (8) # SP a b c --- ---- ---- --- ---- 0 C 0 0.5 0 1 C 0.5 0 -0 2 C 0 0 0.5 3 C 0.5 0.5 0.5 4 Zr -0 0 0 5 V 0 0.5 0.5 6 Ti 0.5 0 0.5 7 Cr 0.5 0.5 0	415.741	-73.7414	-1.41268
Zr1 V1 Mo1 W1 C4	Full Formula (Zr1 V1 Mo1 W1 C4) Reduced Formula: ZrVMoWC4 abc : 4.400348 4.407933 4.408737 angles: 90.000000 90.000000 90.000000 pbc : True True True Sites (8) # SP a b c --- ---- ---- ---- ---- 0 C 0 0.5 -0 1 C 0.5 -0 -0 2 C 0 -0 0.5 3 C 0.5 0.5 0.5 4 Zr -0 -0 -0 5 V 0 0.5 0.5 6 Mo 0.5 -0 0.5 7 W 0.5 0.5 0	453.108	-79.4864	-1.4358
Zr1 V1 Cr1 Mo1 C4	Full Formula (Zr1 V1 Cr1 Mo1 C4) Reduced Formula: ZrVCrMoC4 abc : 4.349266 4.334323 4.361026 angles: 90.000000 90.000000 90.000000 pbc : True True True Sites (8) # SP a b c --- ---- ---- ---- ---- 0 C 0 0.5 -0 1 C 0.5 -0 0 2 C 0 0 0.5 3 C 0.5 0.5 0.5 4 Zr -0 0 -0 5 V 0 0.5 0.5 6 Mo 0.5 -0 0.5 7 Cr 0.5 0.5 0	444.704	-75.3009	-1.35011
Zr1 V1 Cr1 W1 C4	Full Formula (Zr1 V1 Cr1 W1 C4) Reduced Formula: ZrVCrWC4 abc : 4.346640 4.335306 4.362152 angles: 90.000000 90.000000 90.000000 pbc : True True True Sites (8) # SP a b c --- ---- ---- ---- ---- 0 C 0 0.5 0 1 C 0.5 0 0 2 C 0 0 0.5 3 C 0.5 0.5 0.5 4 Zr -0 -0 0 5 V -0 0.5 0.5 6 W 0.5 0 0.5 7 Cr 0.5 0.5 -0	461.106	-77.4935	-1.59919
Zr1 Ti1 Nb1 Mo1 C4	Full Formula (Zr1 Ti1 Nb1 Mo1 C4) Reduced Formula: ZrTiNbMoC4 abc : 4.469788 4.463163 4.481659 angles: 90.000000 90.000000 90.000000 pbc : True True True Sites (8) # SP a b c --- ---- ---- ---- ---- 0 C -0 0.5 -0 1 C 0.5 0 0 2 C -0 0 0.5 3 C 0.5 0.5 0.5 4 Zr 0 -0 -0 5 Nb -0 0.5 0.5 6 Ti 0.5 0 0.5 7 Mo 0.5 0.5 -0	468.097	-78.2043	-1.43303
Zr1 Ti1 Nb1 W1 C4	Full Formula (Zr1 Ti1 Nb1 W1 C4) Reduced Formula: ZrTiNbWC4 abc : 4.467382 4.460389 4.473157 angles: 90.000000 90.000000 90.000000 pbc : True True True Sites (8) # SP a b c --- ---- ---- ---- ---- 0 C -0 0.5 -0 1 C 0.5 -0 -0 2 C 0 -0 0.5 3 C 0.5 0.5 0.5 4 Zr -0 -0 0 5 Nb 0 0.5 0.5 6 Ti 0.5 -0 0.5 7 W 0.5 0.5 0	496.256	-80.3595	-1.67744
Zr1 Ti1 Nb1 Cr1 C4	Full Formula (Zr1 Ti1 Nb1 Cr1 C4) Reduced Formula: ZrTiNbCrC4 abc : 4.408144 4.414321 4.451541 angles: 90.000000 90.000000 90.000000 pbc : True True True Sites (8) # SP a b c --- ---- ---- ---- ---- 0 C 0 0.5 -0 1 C 0.5 -0 0 2 C 0 -0 0.5 3 C 0.5 0.5 0.5 4 Zr 0 -0 -0 5 Nb -0 0.5 0.5 6 Ti 0.5 -0 0.5 7 Cr 0.5 0.5 -0	427.888	-75.6957	-1.53196
Zr1 Nb1 Mo1 W1 C4	Full Formula (Zr1 Nb1 Mo1 W1 C4) Reduced Formula: ZrNbMoWC4 abc : 4.465333 4.474276 4.474412 angles: 90.000000 90.000000 90.000000 pbc : True True True Sites (8) # SP a b c --- ---- ---- --- ---- 0 C 0 0.5 -0 1 C 0.5 0 0 2 C 0 0 0.5 3 C 0.5 0.5 0.5 4 Zr 0 0 -0 5 Nb -0 0.5 0.5 6 Mo 0.5 0 0.5 7 W 0.5 0.5 -0	457.52	-81.3719	-1.54649
Zr1 Nb1 Cr1 Mo1 C4	Full Formula (Zr1 Nb1 Cr1 Mo1 C4) Reduced Formula: ZrNbCrMoC4 abc : 4.415608 4.429262 4.434415 angles: 90.000000 90.000000 90.000000 pbc : True True True Sites (8) # SP a b c --- ---- ---- ---- ---- 0 C -0 0.5 -0 1 C 0.5 -0 0 2 C -0 -0 0.5 3 C 0.5 0.5 0.5 4 Zr -0 -0 -0 5 Nb 0 0.5 0.5 6 Mo 0.5 -0 0.5 7 Cr 0.5 0.5 -0	438.936	-77.1492	-1.45614
Zr1 Nb1 Cr1 W1 C4	Full Formula (Zr1 Nb1 Cr1 W1 C4) Reduced Formula: ZrNbCrWC4 abc : 4.411052 4.427746 4.433411 angles: 90.000000 90.000000 90.000000 pbc : True True True Sites (8) # SP a b c --- ---- ---- --- ---- 0 C 0 0.5 -0 1 C 0.5 0 0 2 C 0 0 0.5 3 C 0.5 0.5 0.5 4 Zr -0 0 -0 5 Nb -0 0.5 0.5 6 W 0.5 0 0.5 7 Cr 0.5 0.5 -0	452.242	-79.2722	-1.69652
Zr1 Ta1 Ti1 Nb1 C4	Full Formula (Zr1 Ta1 Ti1 Nb1 C4) Reduced Formula: ZrTaTiNbC4 abc : 4.504809 4.498209 4.504508 angles: 90.000000 90.000000 90.000000 pbc : True True True Sites (8) # SP a b c --- ---- ---- ---- --- 0 C -0 0.5 0 1 C 0.5 -0 0 2 C -0 -0 0.5 3 C 0.5 0.5 0.5 4 Ta -0 -0 0 5 Zr -0 0.5 0.5 6 Nb 0.5 -0 0.5 7 Ti 0.5 0.5 0	472.561	-80.8173	-1.92216
Zr1 Ti1 Mo1 W1 C4	Full Formula (Zr1 Ti1 Mo1 W1 C4) Reduced Formula: ZrTiMoWC4 abc : 4.414760 4.448416 4.444889 angles: 90.000000 90.000000 90.000000 pbc : True True True Sites (8) # SP a b c --- ---- ---- --- ---- 0 C 0 0.5 0 1 C 0.5 0 -0 2 C -0 0 0.5 3 C 0.5 0.5 0.5 4 Zr -0 0 0 5 Ti 0 0.5 0.5 6 Mo 0.5 0 0.5 7 W 0.5 0.5 0	475.149	-79.6088	-1.4211
Zr1 Ti1 Cr1 Mo1 C4	Full Formula (Zr1 Ti1 Cr1 Mo1 C4) Reduced Formula: ZrTiCrMoC4 abc : 4.366606 4.382149 4.407344 angles: 90.000000 90.000000 90.000000 pbc : True True True Sites (8) # SP a b c --- ---- ---- ---- ---- 0 C -0 0.5 -0 1 C 0.5 -0 0 2 C -0 -0 0.5 3 C 0.5 0.5 0.5 4 Zr 0 -0 -0 5 Ti -0 0.5 0.5 6 Mo 0.5 -0 0.5 7 Cr 0.5 0.5 -0	438.126	-75.1749	-1.30436
Zr1 Ti1 Cr1 W1 C4	Full Formula (Zr1 Ti1 Cr1 W1 C4) Reduced Formula: ZrTiCrWC4 abc : 4.364280 4.380157 4.407084 angles: 90.000000 90.000000 90.000000 pbc : True True True Sites (8) # SP a b c --- ---- ---- ---- ---- 0 C -0 0.5 -0 1 C 0.5 0 0 2 C 0 -0 0.5 3 C 0.5 0.5 0.5 4 Zr -0 -0 -0 5 Ti 0 0.5 0.5 6 W 0.5 -0 0.5 7 Cr 0.5 0.5 -0	461.393	-77.41	-1.55875
Zr1 Cr1 Mo1 W1 C4	Full Formula (Zr1 Cr1 Mo1 W1 C4) Reduced Formula: ZrCrMoWC4 abc : 4.391031 4.396490 4.391529 angles: 90.000000 90.000000 90.000000 pbc : True True True Sites (8) # SP a b c --- ---- ---- ---- ---- 0 C -0 0.5 -0 1 C 0.5 0 0 2 C 0 0 0.5 3 C 0.5 0.5 0.5 4 Zr 0 -0 0 5 Mo -0 0.5 0.5 6 W 0.5 0 0.5 7 Cr 0.5 0.5 0	443.888	-78.6104	-1.45129
Zr1 Ta1 Nb1 Mo1 C4	Full Formula (Zr1 Ta1 Nb1 Mo1 C4) Reduced Formula: ZrTaNbMoC4 abc : 4.498926 4.512703 4.494100 angles: 90.000000 90.000000 90.000000 pbc : True True True Sites (8) # SP a b c --- ---- ---- --- ---- 0 C -0 0.5 0 1 C 0.5 0 0 2 C -0 0 0.5 3 C 0.5 0.5 0.5 4 Ta 0 0 -0 5 Zr 0 0.5 0.5 6 Nb 0.5 0 0.5 7 Mo 0.5 0.5 -0	481.986	-81.9123	-1.80154
Hf1 Ti1 Nb1 V1 C4	Full Formula (Hf1 Ti1 Nb1 V1 C4) Reduced Formula: HfTiNbVC4 abc : 4.437461 4.418617 4.420964 angles: 90.000000 90.000000 90.000000 pbc : True True True Sites (8) # SP a b c --- ---- ---- ---- ---- 0 C -0 0.5 -0 1 C 0.5 0 0 2 C -0 0 0.5 3 C 0.5 0.5 0.5 4 Hf -0 0 -0 5 V 0 0.5 0.5 6 Nb 0.5 -0 0.5 7 Ti 0.5 0.5 -0	463.857	-78.5133	-1.62167
Hf1 Nb1 V1 Mo1 C4	Full Formula (Hf1 Nb1 V1 Mo1 C4) Reduced Formula: HfNbVMoC4 abc : 4.428783 4.418705 4.436317 angles: 90.000000 90.000000 90.000000 pbc : True True True Sites (8) # SP a b c --- ---- ---- ---- --- 0 C 0 0.5 0 1 C 0.5 -0 0 2 C 0 -0 0.5 3 C 0.5 0.5 0.5 4 Hf -0 -0 0 5 V -0 0.5 0.5 6 Nb 0.5 0 0.5 7 Mo 0.5 0.5 0	475.476	-79.8272	-1.5284
Hf1 Nb1 V1 W1 C4	Full Formula (Hf1 Nb1 V1 W1 C4) Reduced Formula: HfNbVWC4 abc : 4.424966 4.415226 4.435929 angles: 90.000000 90.000000 90.000000 pbc : True True True Sites (8) # SP a b c --- ---- ---- ---- ---- 0 C -0 0.5 0 1 C 0.5 -0 0 2 C -0 -0 0.5 3 C 0.5 0.5 0.5 4 Hf -0 -0 0 5 V -0 0.5 0.5 6 Nb 0.5 -0 0.5 7 W 0.5 0.5 -0	479.896	-81.9396	-1.76745
Hf1 Nb1 V1 Cr1 C4	Full Formula (Hf1 Nb1 V1 Cr1 C4) Reduced Formula: HfNbVCrC4 abc : 4.382367 4.351787 4.389821 angles: 90.000000 90.000000 90.000000 pbc : True True True Sites (8) # SP a b c --- ---- ---- ---- ---- 0 C 0 0.5 -0 1 C 0.5 -0 -0 2 C 0 0 0.5 3 C 0.5 0.5 0.5 4 Hf -0 -0 -0 5 V 0 0.5 0.5 6 Nb 0.5 -0 0.5 7 Cr 0.5 0.5 0	455.737	-77.5818	-1.66022
Hf1 Ti1 V1 Mo1 C4	Full Formula (Hf1 Ti1 V1 Mo1 C4) Reduced Formula: HfTiVMoC4 abc : 4.398383 4.379996 4.389227 angles: 90.000000 90.000000 90.000000 pbc : True True True Sites (8) # SP a b c --- ---- ---- ---- ---- 0 C -0 0.5 0 1 C 0.5 -0 -0 2 C -0 0 0.5 3 C 0.5 0.5 0.5 4 Hf -0 -0 0 5 V -0 0.5 0.5 6 Ti 0.5 -0 0.5 7 Mo 0.5 0.5 0	458.6	-77.8879	-1.38099
Hf1 Ti1 V1 W1 C4	Full Formula (Hf1 Ti1 V1 W1 C4) Reduced Formula: HfTiVWC4 abc : 4.395435 4.380022 4.385047 angles: 90.000000 90.000000 90.000000 pbc : True True True Sites (8) # SP a b c --- ---- ---- --- ---- 0 C -0 0.5 0 1 C 0.5 0 -0 2 C 0 0 0.5 3 C 0.5 0.5 0.5 4 Hf -0 0 0 5 V 0 0.5 0.5 6 Ti 0.5 0 0.5 7 W 0.5 0.5 0	488.598	-80.1255	-1.63569
Hf1 Ti1 V1 Cr1 C4	Full Formula (Hf1 Ti1 V1 Cr1 C4) Reduced Formula: HfTiVCrC4 abc : 4.336673 4.303390 4.349722 angles: 90.000000 90.000000 90.000000 pbc : True True True Sites (8) # SP a b c --- ---- ---- ---- ---- 0 C 0 0.5 0 1 C 0.5 -0 -0 2 C 0 -0 0.5 3 C 0.5 0.5 0.5 4 Hf -0 -0 0 5 V -0 0.5 0.5 6 Ti 0.5 -0 0.5 7 Cr 0.5 0.5 0	435.611	-75.5466	-1.50083
Hf1 V1 Mo1 W1 C4	Full Formula (Hf1 V1 Mo1 W1 C4) Reduced Formula: HfVMoWC4 abc : 4.389204 4.396701 4.399784 angles: 90.000000 90.000000 90.000000 pbc : True True True Sites (8) # SP a b c --- ---- --- --- ---- 0 C 0 0.5 -0 1 C 0.5 0 -0 2 C 0 0 0.5 3 C 0.5 0.5 0.5 4 Hf 0 0 0 5 V 0 0.5 0.5 6 Mo 0.5 0 0.5 7 W 0.5 0.5 0	472.338	-81.237	-1.51713
Zr1 Ta1 Nb1 W1 C4	Full Formula (Zr1 Ta1 Nb1 W1 C4) Reduced Formula: ZrTaNbWC4 abc : 4.493369 4.510767 4.489280 angles: 90.000000 90.000000 90.000000 pbc : True True True Sites (8) # SP a b c --- ---- ---- --- ---- 0 C -0 0.5 -0 1 C 0.5 0 -0 2 C 0 0 0.5 3 C 0.5 0.5 0.5 4 Ta 0 0 -0 5 Zr -0 0.5 0.5 6 Nb 0.5 0 0.5 7 W 0.5 0.5 0	484.137	-83.9003	-2.02503
Hf1 V1 Cr1 Mo1 C4	Full Formula (Hf1 V1 Cr1 Mo1 C4) Reduced Formula: HfVCrMoC4 abc : 4.340302 4.327909 4.347068 angles: 90.000000 90.000000 90.000000 pbc : True True True Sites (8) # SP a b c --- ---- ---- --- ---- 0 C 0 0.5 0 1 C 0.5 0 -0 2 C 0 0 0.5 3 C 0.5 0.5 0.5 4 Hf -0 0 0 5 V -0 0.5 0.5 6 Mo 0.5 0 0.5 7 Cr 0.5 0.5 -0	455.214	-77.0859	-1.43574
Hf1 V1 Cr1 W1 C4	Full Formula (Hf1 V1 Cr1 W1 C4) Reduced Formula: HfVCrWC4 abc : 4.336931 4.330573 4.347684 angles: 90.000000 90.000000 90.000000 pbc : True True True Sites (8) # SP a b c --- ---- ---- --- ---- 0 C -0 0.5 -0 1 C 0.5 0 0 2 C 0 0 0.5 3 C 0.5 0.5 0.5 4 Hf 0 0 -0 5 V 0 0.5 0.5 6 W 0.5 0 0.5 7 Cr 0.5 0.5 -0	468.049	-79.286	-1.68575
Hf1 Ti1 Nb1 Mo1 C4	Full Formula (Hf1 Ti1 Nb1 Mo1 C4) Reduced Formula: HfTiNbMoC4 abc : 4.459564 4.450766 4.467219 angles: 90.000000 90.000000 90.000000 pbc : True True True Sites (8) # SP a b c --- ---- ---- --- ---- 0 C -0 0.5 -0 1 C 0.5 0 0 2 C -0 0 0.5 3 C 0.5 0.5 0.5 4 Hf -0 0 -0 5 Nb 0 0.5 0.5 6 Ti 0.5 0 0.5 7 Mo 0.5 0.5 0	482.767	-79.9405	-1.51256
Hf1 Ti1 Nb1 W1 C4	Full Formula (Hf1 Ti1 Nb1 W1 C4) Reduced Formula: HfTiNbWC4 abc : 4.456533 4.446836 4.461195 angles: 90.000000 90.000000 90.000000 pbc : True True True Sites (8) # SP a b c --- ---- ---- --- ---- 0 C 0 0.5 -0 1 C 0.5 0 0 2 C 0 0 0.5 3 C 0.5 0.5 0.5 4 Hf 0 0 -0 5 Nb -0 0.5 0.5 6 Ti 0.5 0 0.5 7 W 0.5 0.5 0	507.962	-82.0917	-1.75647
Hf1 Ti1 Nb1 Cr1 C4	Full Formula (Hf1 Ti1 Nb1 Cr1 C4) Reduced Formula: HfTiNbCrC4 abc : 4.401957 4.404086 4.432179 angles: 90.000000 90.000000 90.000000 pbc : True True True Sites (8) # SP a b c --- ---- ---- ---- ---- 0 C 0 0.5 -0 1 C 0.5 -0 -0 2 C 0 -0 0.5 3 C 0.5 0.5 0.5 4 Hf 0 -0 -0 5 Nb -0 0.5 0.5 6 Ti 0.5 -0 0.5 7 Cr 0.5 0.5 0	445.975	-77.4683	-1.61604
Hf1 Nb1 Mo1 W1 C4	Full Formula (Hf1 Nb1 Mo1 W1 C4) Reduced Formula: HfNbMoWC4 abc : 4.457083 4.460369 4.462808 angles: 90.000000 90.000000 90.000000 pbc : True True True Sites (8) # SP a b c --- ---- ---- ---- ---- 0 C 0 0.5 -0 1 C 0.5 0 0 2 C -0 -0 0.5 3 C 0.5 0.5 0.5 4 Hf -0 0 -0 5 Nb 0 0.5 0.5 6 Mo 0.5 -0 0.5 7 W 0.5 0.5 -0	482.24	-83.0858	-1.62323
Zr1 Ta1 Nb1 Cr1 C4	Full Formula (Zr1 Ta1 Nb1 Cr1 C4) Reduced Formula: ZrTaNbCrC4 abc : 4.455811 4.471809 4.451776 angles: 90.000000 90.000000 90.000000 pbc : True True True Sites (8) # SP a b c --- ---- ---- ---- ---- 0 C 0 0.5 0 1 C 0.5 -0 0 2 C -0 0 0.5 3 C 0.5 0.5 0.5 4 Ta 0 -0 0 5 Zr 0 0.5 0.5 6 Nb 0.5 0 0.5 7 Cr 0.5 0.5 -0	464.456	-79.6231	-1.92789
Hf1 Nb1 Cr1 Mo1 C4	Full Formula (Hf1 Nb1 Cr1 Mo1 C4) Reduced Formula: HfNbCrMoC4 abc : 4.409498 4.418114 4.418225 angles: 90.000000 90.000000 90.000000 pbc : True True True Sites (8) # SP a b c --- ---- ---- --- ---- 0 C -0 0.5 0 1 C 0.5 0 -0 2 C -0 0 0.5 3 C 0.5 0.5 0.5 4 Hf -0 0 -0 5 Nb 0 0.5 0.5 6 Mo 0.5 0 0.5 7 Cr 0.5 0.5 -0	444.544	-78.8936	-1.5367
Hf1 Nb1 Cr1 W1 C4	Full Formula (Hf1 Nb1 Cr1 W1 C4) Reduced Formula: HfNbCrWC4 abc : 4.404287 4.418788 4.416334 angles: 90.000000 90.000000 90.000000 pbc : True True True Sites (8) # SP a b c --- ---- ---- ---- ---- 0 C 0 0.5 -0 1 C 0.5 -0 0 2 C 0 -0 0.5 3 C 0.5 0.5 0.5 4 Hf 0 -0 0 5 Nb -0 0.5 0.5 6 W 0.5 -0 0.5 7 Cr 0.5 0.5 0	458.971	-81.0328	-1.7791
Hf1 Ti1 Mo1 W1 C4	Full Formula (Hf1 Ti1 Mo1 W1 C4) Reduced Formula: HfTiMoWC4 abc : 4.404456 4.435810 4.434319 angles: 90.000000 90.000000 90.000000 pbc : True True True Sites (8) # SP a b c --- ---- ---- --- ---- 0 C -0 0.5 -0 1 C 0.5 0 0 2 C 0 0 0.5 3 C 0.5 0.5 0.5 4 Hf -0 0 -0 5 Ti 0 0.5 0.5 6 Mo 0.5 0 0.5 7 W 0.5 0.5 -0	479.93	-81.3357	-1.49946
Hf1 Ti1 Cr1 Mo1 C4	Full Formula (Hf1 Ti1 Cr1 Mo1 C4) Reduced Formula: HfTiCrMoC4 abc : 4.358891 4.373745 4.391205 angles: 90.000000 90.000000 90.000000 pbc : True True True Sites (8) # SP a b c --- ---- ---- ---- ---- 0 C 0 0.5 -0 1 C 0.5 -0 0 2 C -0 -0 0.5 3 C 0.5 0.5 0.5 4 Hf 0 -0 -0 5 Ti -0 0.5 0.5 6 Mo 0.5 -0 0.5 7 Cr 0.5 0.5 0	455.057	-76.958	-1.38975
Hf1 Ti1 Cr1 W1 C4	Full Formula (Hf1 Ti1 Cr1 W1 C4) Reduced Formula: HfTiCrWC4 abc : 4.355952 4.373245 4.390720 angles: 90.000000 90.000000 90.000000 pbc : True True True Sites (8) # SP a b c --- ---- ---- --- ---- 0 C 0 0.5 -0 1 C 0.5 0 0 2 C 0 0 0.5 3 C 0.5 0.5 0.5 4 Hf -0 0 -0 5 Ti -0 0.5 0.5 6 W 0.5 0 0.5 7 Cr 0.5 0.5 0	481.036	-79.2041	-1.64551
Hf1 Cr1 Mo1 W1 C4	Full Formula (Hf1 Cr1 Mo1 W1 C4) Reduced Formula: HfCrMoWC4 abc : 4.381703 4.388640 4.377685 angles: 90.000000 90.000000 90.000000 pbc : True True True Sites (8) # SP a b c --- ---- --- ---- ---- 0 C 0 0.5 0 1 C 0.5 -0 0 2 C 0 -0 0.5 3 C 0.5 0.5 0.5 4 Hf 0 -0 0 5 Mo 0 0.5 0.5 6 W 0.5 -0 0.5 7 Cr 0.5 0.5 -0	454.624	-80.3543	-1.53178
Ti1 Nb1 V1 Mo1 C4	Full Formula (Ti1 Nb1 V1 Mo1 C4) Reduced Formula: TiNbVMoC4 abc : 4.354529 4.336926 4.341697 angles: 90.000000 90.000000 90.000000 pbc : True True True Sites (8) # SP a b c --- ---- ---- --- ---- 0 C 0 0.5 -0 1 C 0.5 0 0 2 C 0 0 0.5 3 C 0.5 0.5 0.5 4 V -0 0 -0 5 Nb 0 0.5 0.5 6 Ti 0.5 0 0.5 7 Mo 0.5 0.5 0	482.616	-77.7888	-1.4311
Ti1 Nb1 V1 W1 C4	Full Formula (Ti1 Nb1 V1 W1 C4) Reduced Formula: TiNbVWC4 abc : 4.356543 4.334831 4.339932 angles: 90.000000 90.000000 90.000000 pbc : True True True Sites (8) # SP a b c --- ---- ---- --- ---- 0 C 0 0.5 0 1 C 0.5 0 -0 2 C 0 0 0.5 3 C 0.5 0.5 0.5 4 V -0 0 0 5 Nb -0 0.5 0.5 6 Ti 0.5 0 0.5 7 W 0.5 0.5 -0	482.83	-79.9628	-1.67786
Ti1 Nb1 V1 Cr1 C4	Full Formula (Ti1 Nb1 V1 Cr1 C4) Reduced Formula: TiNbVCrC4 abc : 4.283082 4.284359 4.269155 angles: 90.000000 90.000000 90.000000 pbc : True True True Sites (8) # SP a b c --- ---- --- ---- ---- 0 C 0 0.5 0 1 C 0.5 -0 -0 2 C 0 -0 0.5 3 C 0.5 0.5 0.5 4 V 0 -0 0 5 Nb 0 0.5 0.5 6 Ti 0.5 -0 0.5 7 Cr 0.5 0.5 -0	475.528	-75.8013	-1.59516
Nb1 V1 Mo1 W1 C4	Full Formula (Nb1 V1 Mo1 W1 C4) Reduced Formula: NbVMoWC4 abc : 4.356256 4.356237 4.358004 angles: 90.000000 90.000000 90.000000 pbc : True True True Sites (8) # SP a b c --- ---- ---- ---- ---- 0 C 0 0.5 0 1 C 0.5 -0 -0 2 C 0 -0 0.5 3 C 0.5 0.5 0.5 4 V -0 -0 0 5 Nb -0 0.5 0.5 6 Mo 0.5 -0 0.5 7 W 0.5 0.5 -0	511.887	-80.8933	-1.53666
Zr1 Ta1 Ti1 Mo1 C4	Full Formula (Zr1 Ta1 Ti1 Mo1 C4) Reduced Formula: ZrTaTiMoC4 abc : 4.469761 4.480983 4.458115 angles: 90.000000 90.000000 90.000000 pbc : True True True Sites (8) # SP a b c --- ---- ---- ---- ---- 0 C 0 0.5 -0 1 C 0.5 -0 -0 2 C 0 -0 0.5 3 C 0.5 0.5 0.5 4 Ta -0 -0 -0 5 Zr -0 0.5 0.5 6 Ti 0.5 -0 0.5 7 Mo 0.5 0.5 0	474.571	-79.9833	-1.65542
Nb1 V1 Cr1 Mo1 C4	Full Formula (Nb1 V1 Cr1 Mo1 C4) Reduced Formula: NbVCrMoC4 abc : 4.304801 4.298937 4.279832 angles: 90.000000 90.000000 90.000000 pbc : True True True Sites (8) # SP a b c --- ---- ---- --- ---- 0 C -0 0.5 0 1 C 0.5 0 0 2 C -0 0 0.5 3 C 0.5 0.5 0.5 4 V 0 0 -0 5 Nb 0 0.5 0.5 6 Mo 0.5 0 0.5 7 Cr 0.5 0.5 0	469.412	-77.0533	-1.49417
Nb1 V1 Cr1 W1 C4	Full Formula (Nb1 V1 Cr1 W1 C4) Reduced Formula: NbVCrWC4 abc : 4.302020 4.301926 4.282796 angles: 90.000000 90.000000 90.000000 pbc : True True True Sites (8) # SP a b c --- ---- ---- ---- --- 0 C 0 0.5 0 1 C 0.5 0 0 2 C 0 -0 0.5 3 C 0.5 0.5 0.5 4 V 0 0 0 5 Nb -0 0.5 0.5 6 W 0.5 0 0.5 7 Cr 0.5 0.5 0	493.576	-79.204	-1.73799
Ti1 V1 Mo1 W1 C4	Full Formula (Ti1 V1 Mo1 W1 C4) Reduced Formula: TiVMoWC4 abc : 4.298720 4.321044 4.317172 angles: 90.000000 90.000000 90.000000 pbc : True True True Sites (8) # SP a b c --- ---- ---- ---- ---- 0 C -0 0.5 -0 1 C 0.5 -0 -0 2 C -0 -0 0.5 3 C 0.5 0.5 0.5 4 V 0 -0 -0 5 Ti 0 0.5 0.5 6 Mo 0.5 -0 0.5 7 W 0.5 0.5 0	488	-79.3991	-1.44489
Ti1 V1 Cr1 Mo1 C4	Full Formula (Ti1 V1 Cr1 Mo1 C4) Reduced Formula: TiVCrMoC4 abc : 4.241096 4.243582 4.240331 angles: 90.000000 90.000000 90.000000 pbc : True True True Sites (8) # SP a b c --- ---- ---- ---- ---- 0 C 0 0.5 0 1 C 0.5 -0 -0 2 C 0 -0 0.5 3 C 0.5 0.5 0.5 4 V 0 -0 0 5 Ti -0 0.5 0.5 6 Mo 0.5 -0 0.5 7 Cr 0.5 0.5 0	486.793	-75.4598	-1.38997
Ti1 V1 Cr1 W1 C4	Full Formula (Ti1 V1 Cr1 W1 C4) Reduced Formula: TiVCrWC4 abc : 4.239835 4.246121 4.246319 angles: 90.000000 90.000000 90.000000 pbc : True True True Sites (8) # SP a b c --- ---- ---- ---- ---- 0 C -0 0.5 0 1 C 0.5 -0 0 2 C 0 -0 0.5 3 C 0.5 0.5 0.5 4 V 0 -0 -0 5 Ti -0 0.5 0.5 6 W 0.5 -0 0.5 7 Cr 0.5 0.5 -0	495.485	-77.6909	-1.64387
Zr1 Ta1 Ti1 W1 C4	Full Formula (Zr1 Ta1 Ti1 W1 C4) Reduced Formula: ZrTaTiWC4 abc : 4.467081 4.472703 4.455840 angles: 90.000000 90.000000 90.000000 pbc : True True True Sites (8) # SP a b c --- ---- ---- --- ---- 0 C 0 0.5 -0 1 C 0.5 0 0 2 C 0 0 0.5 3 C 0.5 0.5 0.5 4 Ta -0 0 -0 5 Zr -0 0.5 0.5 6 Ti 0.5 0 0.5 7 W 0.5 0.5 0	503.261	-82.1204	-1.89755
V1 Cr1 Mo1 W1 C4	Full Formula (V1 Cr1 Mo1 W1 C4) Reduced Formula: VCrMoWC4 abc : 4.270116 4.275482 4.251967 angles: 90.000000 90.000000 90.000000 pbc : True True True Sites (8) # SP a b c --- ---- ---- ---- ---- 0 C -0 0.5 0 1 C 0.5 -0 -0 2 C -0 -0 0.5 3 C 0.5 0.5 0.5 4 V 0 -0 -0 5 Mo -0 0.5 0.5 6 W 0.5 -0 0.5 7 Cr 0.5 0.5 0	476.783	-78.6597	-1.50746
Ti1 Nb1 Mo1 W1 C4	Full Formula (Ti1 Nb1 Mo1 W1 C4) Reduced Formula: TiNbMoWC4 abc : 4.384958 4.388787 4.384291 angles: 90.000000 90.000000 90.000000 pbc : True True True Sites (8) # SP a b c --- ---- ---- ---- ---- 0 C -0 0.5 -0 1 C 0.5 -0 0 2 C 0 -0 0.5 3 C 0.5 0.5 0.5 4 Nb -0 -0 -0 5 Ti -0 0.5 0.5 6 Mo 0.5 -0 0.5 7 W 0.5 0.5 -0	477.774	-80.9652	-1.51565
Ti1 Nb1 Cr1 Mo1 C4	Full Formula (Ti1 Nb1 Cr1 Mo1 C4) Reduced Formula: TiNbCrMoC4 abc : 4.332471 4.319728 4.336826 angles: 90.000000 90.000000 90.000000 pbc : True True True Sites (8) # SP a b c --- ---- ---- ---- ---- 0 C -0 0.5 0 1 C 0.5 -0 -0 2 C 0 -0 0.5 3 C 0.5 0.5 0.5 4 Nb -0 -0 0 5 Ti 0 0.5 0.5 6 Mo 0.5 -0 0.5 7 Cr 0.5 0.5 0	460.071	-76.9317	-1.44896
Ti1 Nb1 Cr1 W1 C4	Full Formula (Ti1 Nb1 Cr1 W1 C4) Reduced Formula: TiNbCrWC4 abc : 4.328270 4.319702 4.340399 angles: 90.000000 90.000000 90.000000 pbc : True True True Sites (8) # SP a b c --- ---- ---- ---- ---- 0 C 0 0.5 -0 1 C 0.5 -0 0 2 C 0 0 0.5 3 C 0.5 0.5 0.5 4 Nb -0 -0 -0 5 Ti 0 0.5 0.5 6 W 0.5 0 0.5 7 Cr 0.5 0.5 -0	466.907	-79.1113	-1.69641
Hf1 Zr1 Ta1 Ti1 C4	Full Formula (Hf1 Zr1 Ta1 Ti1 C4) Reduced Formula: HfZrTaTiC4 abc : 4.548570 4.552433 4.537019 angles: 90.000000 90.000000 90.000000 pbc : True True True Sites (8) # SP a b c --- ---- ---- --- ---- 0 C 0 0.5 0 1 C 0.5 0 -0 2 C 0 0 0.5 3 C 0.5 0.5 0.5 4 Ta -0 0 0 5 Zr 0 0.5 0.5 6 Hf 0.5 0 0.5 7 Ti 0.5 0.5 -0	470.853	-81.2797	-1.91746
Zr1 Ta1 Ti1 Cr1 C4	Full Formula (Zr1 Ta1 Ti1 Cr1 C4) Reduced Formula: ZrTaTiCrC4 abc : 4.410107 4.451205 4.410685 angles: 90.000000 90.000000 90.000000 pbc : True True True Sites (8) # SP a b c --- ---- ---- ---- ---- 0 C 0 0.5 0 1 C 0.5 -0 -0 2 C 0 -0 0.5 3 C 0.5 0.5 0.5 4 Ta 0 -0 0 5 Zr -0 0.5 0.5 6 Ti 0.5 -0 0.5 7 Cr 0.5 0.5 -0	441.474	-77.5341	-1.76176
Nb1 Cr1 Mo1 W1 C4	Full Formula (Nb1 Cr1 Mo1 W1 C4) Reduced Formula: NbCrMoWC4 abc : 4.343998 4.348258 4.341267 angles: 90.000000 90.000000 90.000000 pbc : True True True Sites (8) # SP a b c --- ---- ---- --- ---- 0 C 0 0.5 0 1 C 0.5 0 0 2 C 0 0 0.5 3 C 0.5 0.5 0.5 4 Nb 0 0 0 5 Mo -0 0.5 0.5 6 W 0.5 0 0.5 7 Cr 0.5 0.5 -0	467.879	-80.015	-1.55188
Ti1 Cr1 Mo1 W1 C4	Full Formula (Ti1 Cr1 Mo1 W1 C4) Reduced Formula: TiCrMoWC4 abc : 4.301691 4.309960 4.283172 angles: 90.000000 90.000000 90.000000 pbc : True True True Sites (8) # SP a b c --- ---- ---- --- ---- 0 C -0 0.5 -0 1 C 0.5 0 0 2 C -0 0 0.5 3 C 0.5 0.5 0.5 4 Ti 0 0 -0 5 Mo 0 0.5 0.5 6 W 0.5 0 0.5 7 Cr 0.5 0.5 0	484.482	-78.5682	-1.46603
Zr1 Ta1 Mo1 W1 C4	Full Formula (Zr1 Ta1 Mo1 W1 C4) Reduced Formula: ZrTaMoWC4 abc : 4.470063 4.470305 4.471010 angles: 90.000000 90.000000 90.000000 pbc : True True True Sites (8) # SP a b c --- ---- ---- --- ---- 0 C 0 0.5 -0 1 C 0.5 0 -0 2 C 0 0 0.5 3 C 0.5 0.5 0.5 4 Ta -0 0 -0 5 Zr 0 0.5 0.5 6 Mo 0.5 0 0.5 7 W 0.5 0.5 0	484.578	-83.0763	-1.75954
Zr1 Ta1 Cr1 Mo1 C4	Full Formula (Zr1 Ta1 Cr1 Mo1 C4) Reduced Formula: ZrTaCrMoC4 abc : 4.420308 4.432231 4.426794 angles: 90.000000 90.000000 90.000000 pbc : True True True Sites (8) # SP a b c --- ---- ---- --- ---- 0 C 0 0.5 0 1 C 0.5 0 -0 2 C 0 0 0.5 3 C 0.5 0.5 0.5 4 Ta 0 0 0 5 Zr -0 0.5 0.5 6 Mo 0.5 0 0.5 7 Cr 0.5 0.5 0	438.872	-78.9052	-1.67566
Zr1 Ta1 Cr1 W1 C4	Full Formula (Zr1 Ta1 Cr1 W1 C4) Reduced Formula: ZrTaCrWC4 abc : 4.414638 4.432240 4.425224 angles: 90.000000 90.000000 90.000000 pbc : True True True Sites (8) # SP a b c --- ---- ---- ---- ---- 0 C 0 0.5 0 1 C 0.5 -0 0 2 C 0 -0 0.5 3 C 0.5 0.5 0.5 4 Ta 0 -0 -0 5 Zr -0 0.5 0.5 6 W 0.5 -0 0.5 7 Cr 0.5 0.5 -0	453.03	-81.0284	-1.91605
Hf1 Ta1 Nb1 V1 C4	Full Formula (Hf1 Ta1 Nb1 V1 C4) Reduced Formula: HfTaNbVC4 abc : 4.458742 4.456474 4.459696 angles: 90.000000 90.000000 90.000000 pbc : True True True Sites (8) # SP a b c --- ---- --- --- ---- 0 C 0 0.5 -0 1 C 0.5 0 0 2 C 0 0 0.5 3 C 0.5 0.5 0.5 4 Ta 0 0 -0 5 Hf 0 0.5 0.5 6 V 0.5 0 0.5 7 Nb 0.5 0.5 0	518.71	-82.3633	-2.00791
Hf1 Ta1 Ti1 V1 C4	Full Formula (Hf1 Ta1 Ti1 V1 C4) Reduced Formula: HfTaTiVC4 abc : 4.418903 4.418708 4.435777 angles: 90.000000 90.000000 90.000000 pbc : True True True Sites (8) # SP a b c --- ---- ---- --- ---- 0 C -0 0.5 -0 1 C 0.5 0 0 2 C 0 0 0.5 3 C 0.5 0.5 0.5 4 Ta -0 0 -0 5 Hf -0 0.5 0.5 6 V 0.5 0 0.5 7 Ti 0.5 0.5 0	481.636	-80.3633	-1.85291
Hf1 Zr1 Ta1 Mo1 C4	Full Formula (Hf1 Zr1 Ta1 Mo1 C4) Reduced Formula: HfZrTaMoC4 abc : 4.549578 4.553823 4.517985 angles: 90.000000 90.000000 90.000000 pbc : True True True Sites (8) # SP a b c --- ---- ---- --- ---- 0 C -0 0.5 -0 1 C 0.5 0 0 2 C -0 0 0.5 3 C 0.5 0.5 0.5 4 Ta -0 0 -0 5 Zr 0 0.5 0.5 6 Hf 0.5 0 0.5 7 Mo 0.5 0.5 -0	464.054	-82.4486	-1.80607
Hf1 Ta1 V1 Mo1 C4	Full Formula (Hf1 Ta1 V1 Mo1 C4) Reduced Formula: HfTaVMoC4 abc : 4.420793 4.435618 4.425589 angles: 90.000000 90.000000 90.000000 pbc : True True True Sites (8) # SP a b c --- ---- ---- --- ---- 0 C 0 0.5 0 1 C 0.5 0 -0 2 C -0 0 0.5 3 C 0.5 0.5 0.5 4 Ta 0 0 0 5 Hf 0 0.5 0.5 6 V 0.5 0 0.5 7 Mo 0.5 0.5 0	485.723	-81.5958	-1.74947
Hf1 Ta1 V1 W1 C4	Full Formula (Hf1 Ta1 V1 W1 C4) Reduced Formula: HfTaVWC4 abc : 4.417319 4.434764 4.422946 angles: 90.000000 90.000000 90.000000 pbc : True True True Sites (8) # SP a b c --- ---- ---- ---- ---- 0 C 0 0.5 0 1 C 0.5 -0 -0 2 C -0 0 0.5 3 C 0.5 0.5 0.5 4 Ta 0 -0 0 5 Hf 0 0.5 0.5 6 V 0.5 -0 0.5 7 W 0.5 0.5 0	487.079	-83.701	-1.98762
Hf1 Ta1 V1 Cr1 C4	Full Formula (Hf1 Ta1 V1 Cr1 C4) Reduced Formula: HfTaVCrC4 abc : 4.356550 4.389877 4.380094 angles: 90.000000 90.000000 90.000000 pbc : True True True Sites (8) # SP a b c --- ---- ---- --- ---- 0 C 0 0.5 0 1 C 0.5 0 -0 2 C 0 0 0.5 3 C 0.5 0.5 0.5 4 Ta -0 0 0 5 Hf -0 0.5 0.5 6 V 0.5 0 0.5 7 Cr 0.5 0.5 -0	470.695	-79.406	-1.88826
Hf1 Ta1 Ti1 Nb1 C4	Full Formula (Hf1 Ta1 Ti1 Nb1 C4) Reduced Formula: HfTaTiNbC4 abc : 4.493110 4.483573 4.491267 angles: 90.000000 90.000000 90.000000 pbc : True True True Sites (8) # SP a b c --- ---- ---- ---- ---- 0 C -0 0.5 -0 1 C 0.5 -0 0 2 C 0 -0 0.5 3 C 0.5 0.5 0.5 4 Ta -0 -0 -0 5 Hf -0 0.5 0.5 6 Nb 0.5 -0 0.5 7 Ti 0.5 0.5 -0	492.62	-82.5648	-2.0031
Hf1 Ta1 Nb1 Mo1 C4	Full Formula (Hf1 Ta1 Nb1 Mo1 C4) Reduced Formula: HfTaNbMoC4 abc : 4.488889 4.497702 4.482847 angles: 90.000000 90.000000 90.000000 pbc : True True True Sites (8) # SP a b c --- ---- ---- ---- --- 0 C 0 0.5 0 1 C 0.5 -0 0 2 C -0 -0 0.5 3 C 0.5 0.5 0.5 4 Ta 0 -0 0 5 Hf 0 0.5 0.5 6 Nb 0.5 -0 0.5 7 Mo 0.5 0.5 0	499.163	-83.6163	-1.87703
Hf1 Ta1 Nb1 W1 C4	Full Formula (Hf1 Ta1 Nb1 W1 C4) Reduced Formula: HfTaNbWC4 abc : 4.483396 4.496452 4.477982 angles: 90.000000 90.000000 90.000000 pbc : True True True Sites (8) # SP a b c --- ---- ---- ---- ---- 0 C 0 0.5 -0 1 C 0.5 0 0 2 C 0 0 0.5 3 C 0.5 0.5 0.5 4 Ta 0 0 0 5 Hf -0 0.5 0.5 6 Nb 0.5 -0 0.5 7 W 0.5 0.5 -0	501.943	-85.6135	-2.10169
Hf1 Ta1 Nb1 Cr1 C4	Full Formula (Hf1 Ta1 Nb1 Cr1 C4) Reduced Formula: HfTaNbCrC4 abc : 4.447038 4.454018 4.441856 angles: 90.000000 90.000000 90.000000 pbc : True True True Sites (8) # SP a b c --- ---- --- ---- ---- 0 C 0 0.5 0 1 C 0.5 -0 -0 2 C 0 0 0.5 3 C 0.5 0.5 0.5 4 Ta 0 0 0 5 Hf 0 0.5 0.5 6 Nb 0.5 0 0.5 7 Cr 0.5 0.5 0	481.382	-81.3757	-2.00947
Hf1 Ta1 Ti1 Mo1 C4	Full Formula (Hf1 Ta1 Ti1 Mo1 C4) Reduced Formula: HfTaTiMoC4 abc : 4.460731 4.466540 4.445371 angles: 90.000000 90.000000 90.000000 pbc : True True True Sites (8) # SP a b c --- ---- ---- ---- ---- 0 C 0 0.5 0 1 C 0.5 -0 0 2 C -0 -0 0.5 3 C 0.5 0.5 0.5 4 Ta -0 -0 -0 5 Hf -0 0.5 0.5 6 Ti 0.5 -0 0.5 7 Mo 0.5 0.5 -0	484.97	-81.7314	-1.73642
Hf1 Zr1 Ta1 W1 C4	Full Formula (Hf1 Zr1 Ta1 W1 C4) Reduced Formula: HfZrTaWC4 abc : 4.543913 4.545677 4.514833 angles: 90.000000 90.000000 90.000000 pbc : True True True Sites (8) # SP a b c --- ---- ---- --- ---- 0 C 0 0.5 0 1 C 0.5 0 -0 2 C -0 0 0.5 3 C 0.5 0.5 0.5 4 Ta -0 0 0 5 Zr 0 0.5 0.5 6 Hf 0.5 0 0.5 7 W 0.5 0.5 -0	472.335	-84.5237	-2.04046
Hf1 Ta1 Ti1 W1 C4	Full Formula (Hf1 Ta1 Ti1 W1 C4) Reduced Formula: HfTaTiWC4 abc : 4.457247 4.460758 4.442371 angles: 90.000000 90.000000 90.000000 pbc : True True True Sites (8) # SP a b c --- ---- ---- ---- ---- 0 C 0 0.5 0 1 C 0.5 -0 0 2 C -0 -0 0.5 3 C 0.5 0.5 0.5 4 Ta -0 -0 0 5 Hf -0 0.5 0.5 6 Ti 0.5 -0 0.5 7 W 0.5 0.5 -0	510.806	-83.8715	-1.97893
Hf1 Ta1 Ti1 Cr1 C4	Full Formula (Hf1 Ta1 Ti1 Cr1 C4) Reduced Formula: HfTaTiCrC4 abc : 4.404606 4.431872 4.400419 angles: 90.000000 90.000000 90.000000 pbc : True True True Sites (8) # SP a b c --- ---- ---- ---- ---- 0 C -0 0.5 0 1 C 0.5 0 0 2 C -0 0 0.5 3 C 0.5 0.5 0.5 4 Ta -0 0 -0 5 Hf 0 0.5 0.5 6 Ti 0.5 -0 0.5 7 Cr 0.5 0.5 -0	459.967	-79.324	-1.848
Hf1 Ta1 Mo1 W1 C4	Full Formula (Hf1 Ta1 Mo1 W1 C4) Reduced Formula: HfTaMoWC4 abc : 4.461969 4.458915 4.457303 angles: 90.000000 90.000000 90.000000 pbc : True True True Sites (8) # SP a b c --- ---- ---- --- ---- 0 C 0 0.5 -0 1 C 0.5 0 -0 2 C -0 0 0.5 3 C 0.5 0.5 0.5 4 Ta 0 0 -0 5 Hf -0 0.5 0.5 6 Mo 0.5 0 0.5 7 W 0.5 0.5 0	507.352	-84.7947	-1.83684
Hf1 Ta1 Cr1 Mo1 C4	Full Formula (Hf1 Ta1 Cr1 Mo1 C4) Reduced Formula: HfTaCrMoC4 abc : 4.415227 4.415699 4.415269 angles: 90.000000 90.000000 90.000000 pbc : True True True Sites (8) # SP a b c --- ---- ---- --- ---- 0 C 0 0.5 -0 1 C 0.5 0 0 2 C -0 0 0.5 3 C 0.5 0.5 0.5 4 Ta -0 0 -0 5 Hf -0 0.5 0.5 6 Mo 0.5 0 0.5 7 Cr 0.5 0.5 -0	454.484	-80.6657	-1.75821
Hf1 Ta1 Cr1 W1 C4	Full Formula (Hf1 Ta1 Cr1 W1 C4) Reduced Formula: HfTaCrWC4 abc : 4.409122 4.415226 4.415497 angles: 90.000000 90.000000 90.000000 pbc : True True True Sites (8) # SP a b c --- ---- ---- --- ---- 0 C 0 0.5 -0 1 C 0.5 0 0 2 C 0 0 0.5 3 C 0.5 0.5 0.5 4 Ta 0 0 -0 5 Hf -0 0.5 0.5 6 W 0.5 0 0.5 7 Cr 0.5 0.5 0	469.052	-82.7835	-1.99793
Ta1 Ti1 Nb1 V1 C4	Full Formula (Ta1 Ti1 Nb1 V1 C4) Reduced Formula: TaTiNbVC4 abc : 4.381956 4.370269 4.383807 angles: 90.000000 90.000000 90.000000 pbc : True True True Sites (8) # SP a b c --- ---- --- --- ---- 0 C 0 0.5 0 1 C 0.5 0 -0 2 C 0 0 0.5 3 C 0.5 0.5 0.5 4 Ta 0 0 0 5 V 0 0.5 0.5 6 Nb 0.5 0 0.5 7 Ti 0.5 0.5 -0	535.261	-80.2381	-1.89976
Hf1 Zr1 Ta1 Cr1 C4	Full Formula (Hf1 Zr1 Ta1 Cr1 C4) Reduced Formula: HfZrTaCrC4 abc : 4.513401 4.524297 4.476049 angles: 90.000000 90.000000 90.000000 pbc : True True True Sites (8) # SP a b c --- ---- ---- --- ---- 0 C 0 0.5 -0 1 C 0.5 0 0 2 C 0 0 0.5 3 C 0.5 0.5 0.5 4 Ta -0 0 -0 5 Zr -0 0.5 0.5 6 Hf 0.5 0 0.5 7 Cr 0.5 0.5 0	442.707	-79.8867	-1.89833
Ta1 Nb1 V1 Mo1 C4	Full Formula (Ta1 Nb1 V1 Mo1 C4) Reduced Formula: TaNbVMoC4 abc : 4.388428 4.388515 4.385716 angles: 90.000000 90.000000 90.000000 pbc : True True True Sites (8) # SP a b c --- ---- ---- ---- ---- 0 C -0 0.5 0 1 C 0.5 -0 0 2 C -0 -0 0.5 3 C 0.5 0.5 0.5 4 Ta -0 -0 0 5 V -0 0.5 0.5 6 Nb 0.5 -0 0.5 7 Mo 0.5 0.5 -0	504.671	-81.273	-1.77163
Ta1 Nb1 V1 W1 C4	Full Formula (Ta1 Nb1 V1 W1 C4) Reduced Formula: TaNbVWC4 abc : 4.386049 4.387025 4.385168 angles: 90.000000 90.000000 90.000000 pbc : True True True Sites (8) # SP a b c --- ---- ---- --- --- 0 C -0 0.5 0 1 C 0.5 0 0 2 C -0 0 0.5 3 C 0.5 0.5 0.5 4 Ta 0 0 0 5 V -0 0.5 0.5 6 Nb 0.5 0 0.5 7 W 0.5 0.5 0	529.231	-83.3185	-2.00232
Ta1 Nb1 V1 Cr1 C4	Full Formula (Ta1 Nb1 V1 Cr1 C4) Reduced Formula: TaNbVCrC4 abc : 4.338277 4.317305 4.336274 angles: 90.000000 90.000000 90.000000 pbc : True True True Sites (8) # SP a b c --- ---- ---- ---- ---- 0 C -0 0.5 0 1 C 0.5 -0 -0 2 C 0 0 0.5 3 C 0.5 0.5 0.5 4 Ta 0 -0 0 5 V -0 0.5 0.5 6 Nb 0.5 -0 0.5 7 Cr 0.5 0.5 -0	479.012	-79.3665	-1.94582
Ta1 Ti1 V1 Mo1 C4	Full Formula (Ta1 Ti1 V1 Mo1 C4) Reduced Formula: TaTiVMoC4 abc : 4.356440 4.344879 4.337277 angles: 90.000000 90.000000 90.000000 pbc : True True True Sites (8) # SP a b c --- ---- ---- ---- ---- 0 C 0 0.5 -0 1 C 0.5 0 0 2 C -0 0 0.5 3 C 0.5 0.5 0.5 4 Ta -0 0 -0 5 V 0 0.5 0.5 6 Ti 0.5 -0 0.5 7 Mo 0.5 0.5 -0	494.432	-79.5815	-1.65519
Ta1 Ti1 V1 W1 C4	Full Formula (Ta1 Ti1 V1 W1 C4) Reduced Formula: TaTiVWC4 abc : 4.357666 4.342536 4.336441 angles: 90.000000 90.000000 90.000000 pbc : True True True Sites (8) # SP a b c --- ---- ---- --- ---- 0 C 0 0.5 -0 1 C 0.5 0 0 2 C 0 0 0.5 3 C 0.5 0.5 0.5 4 Ta 0 0 -0 5 V -0 0.5 0.5 6 Ti 0.5 0 0.5 7 W 0.5 0.5 -0	493.4	-81.7385	-1.89981
Ta1 Ti1 V1 Cr1 C4	Full Formula (Ta1 Ti1 V1 Cr1 C4) Reduced Formula: TaTiVCrC4 abc : 4.287502 4.275941 4.285450 angles: 90.000000 90.000000 90.000000 pbc : True True True Sites (8) # SP a b c --- ---- ---- ---- ---- 0 C -0 0.5 -0 1 C 0.5 -0 0 2 C 0 -0 0.5 3 C 0.5 0.5 0.5 4 Ta -0 -0 -0 5 V 0 0.5 0.5 6 Ti 0.5 -0 0.5 7 Cr 0.5 0.5 -0	494.544	-77.6279	-1.82349
Ta1 V1 Mo1 W1 C4	Full Formula (Ta1 V1 Mo1 W1 C4) Reduced Formula: TaVMoWC4 abc : 4.359527 4.359157 4.357974 angles: 90.000000 90.000000 90.000000 pbc : True True True Sites (8) # SP a b c --- ---- ---- ---- ---- 0 C -0 0.5 -0 1 C 0.5 -0 0 2 C -0 -0 0.5 3 C 0.5 0.5 0.5 4 Ta -0 -0 -0 5 V 0 0.5 0.5 6 Mo 0.5 -0 0.5 7 W 0.5 0.5 -0	512.511	-82.6151	-1.75189
Ta1 V1 Cr1 Mo1 C4	Full Formula (Ta1 V1 Cr1 Mo1 C4) Reduced Formula: TaVCrMoC4 abc : 4.309913 4.284045 4.300996 angles: 90.000000 90.000000 90.000000 pbc : True True True Sites (8) # SP a b c --- ---- ---- ---- ---- 0 C -0 0.5 0 1 C 0.5 0 -0 2 C 0 0 0.5 3 C 0.5 0.5 0.5 4 Ta 0 -0 0 5 V 0 0.5 0.5 6 Mo 0.5 0 0.5 7 Cr 0.5 0.5 -0	484.656	-78.8284	-1.71605
Ta1 V1 Cr1 W1 C4	Full Formula (Ta1 V1 Cr1 W1 C4) Reduced Formula: TaVCrWC4 abc : 4.306397 4.288112 4.303369 angles: 90.000000 90.000000 90.000000 pbc : True True True Sites (8) # SP a b c --- ---- ---- ---- ---- 0 C -0 0.5 -0 1 C 0.5 -0 0 2 C 0 -0 0.5 3 C 0.5 0.5 0.5 4 Ta -0 -0 -0 5 V 0 0.5 0.5 6 W 0.5 -0 0.5 7 Cr 0.5 0.5 0	502.221	-80.9662	-1.95827
Ta1 Ti1 Nb1 Mo1 C4	Full Formula (Ta1 Ti1 Nb1 Mo1 C4) Reduced Formula: TaTiNbMoC4 abc : 4.422863 4.417640 4.412975 angles: 90.000000 90.000000 90.000000 pbc : True True True Sites (8) # SP a b c --- ---- ---- --- ---- 0 C -0 0.5 -0 1 C 0.5 0 0 2 C -0 0 0.5 3 C 0.5 0.5 0.5 4 Ta -0 0 -0 5 Nb -0 0.5 0.5 6 Ti 0.5 0 0.5 7 Mo 0.5 0.5 0	486.62	-81.3548	-1.75185
Ta1 Ti1 Nb1 W1 C4	Full Formula (Ta1 Ti1 Nb1 W1 C4) Reduced Formula: TaTiNbWC4 abc : 4.423315 4.412578 4.409992 angles: 90.000000 90.000000 90.000000 pbc : True True True Sites (8) # SP a b c --- ---- ---- --- ---- 0 C -0 0.5 0 1 C 0.5 0 0 2 C -0 0 0.5 3 C 0.5 0.5 0.5 4 Ta -0 0 -0 5 Nb -0 0.5 0.5 6 Ti 0.5 0 0.5 7 W 0.5 0.5 0	463.053	-83.4063	-1.98329
Ta1 Ti1 Nb1 Cr1 C4	Full Formula (Ta1 Ti1 Nb1 Cr1 C4) Reduced Formula: TaTiNbCrC4 abc : 4.357974 4.372042 4.367835 angles: 90.000000 90.000000 90.000000 pbc : True True True Sites (8) # SP a b c --- ---- ---- --- ---- 0 C -0 0.5 0 1 C 0.5 0 0 2 C -0 0 0.5 3 C 0.5 0.5 0.5 4 Ta -0 0 0 5 Nb 0 0.5 0.5 6 Ti 0.5 0 0.5 7 Cr 0.5 0.5 -0	492.081	-79.2695	-1.90368
Ta1 Nb1 Mo1 W1 C4	Full Formula (Ta1 Nb1 Mo1 W1 C4) Reduced Formula: TaNbMoWC4 abc : 4.424022 4.424519 4.425755 angles: 90.000000 90.000000 90.000000 pbc : True True True Sites (8) # SP a b c --- ---- ---- ---- ---- 0 C 0 0.5 -0 1 C 0.5 -0 0 2 C 0 -0 0.5 3 C 0.5 0.5 0.5 4 Ta 0 -0 -0 5 Nb -0 0.5 0.5 6 Mo 0.5 -0 0.5 7 W 0.5 0.5 -0	487.554	-84.236	-1.82949
Ta1 Nb1 Cr1 Mo1 C4	Full Formula (Ta1 Nb1 Cr1 Mo1 C4) Reduced Formula: TaNbCrMoC4 abc : 4.379586 4.373244 4.373088 angles: 90.000000 90.000000 90.000000 pbc : True True True Sites (8) # SP a b c --- ---- ---- --- ---- 0 C -0 0.5 0 1 C 0.5 0 0 2 C 0 0 0.5 3 C 0.5 0.5 0.5 4 Ta -0 0 0 5 Nb 0 0.5 0.5 6 Mo 0.5 0 0.5 7 Cr 0.5 0.5 -0	479.966	-80.379	-1.78487
Zr1 Ta1 Nb1 V1 C4	Full Formula (Zr1 Ta1 Nb1 V1 C4) Reduced Formula: ZrTaNbVC4 abc : 4.469301 4.467802 4.475025 angles: 90.000000 90.000000 90.000000 pbc : True True True Sites (8) # SP a b c --- ---- ---- --- ---- 0 C 0 0.5 0 1 C 0.5 0 -0 2 C 0 0 0.5 3 C 0.5 0.5 0.5 4 Ta 0 0 0 5 Zr -0 0.5 0.5 6 V 0.5 0 0.5 7 Nb 0.5 0.5 0	502.229	-80.6142	-1.92677
Ta1 Nb1 Cr1 W1 C4	Full Formula (Ta1 Nb1 Cr1 W1 C4) Reduced Formula: TaNbCrWC4 abc : 4.375653 4.374213 4.372661 angles: 90.000000 90.000000 90.000000 pbc : True True True Sites (8) # SP a b c --- ---- ---- ---- ---- 0 C 0 0.5 -0 1 C 0.5 -0 0 2 C 0 -0 0.5 3 C 0.5 0.5 0.5 4 Ta 0 -0 -0 5 Nb -0 0.5 0.5 6 W 0.5 -0 0.5 7 Cr 0.5 0.5 -0	501.35	-82.4523	-2.01904
Ta1 Ti1 Mo1 W1 C4	Full Formula (Ta1 Ti1 Mo1 W1 C4) Reduced Formula: TaTiMoWC4 abc : 4.390973 4.386903 4.383520 angles: 90.000000 90.000000 90.000000 pbc : True True True Sites (8) # SP a b c --- ---- ---- ---- --- 0 C -0 0.5 0 1 C 0.5 -0 0 2 C 0 -0 0.5 3 C 0.5 0.5 0.5 4 Ta 0 -0 0 5 Ti 0 0.5 0.5 6 Mo 0.5 -0 0.5 7 W 0.5 0.5 0	497.431	-82.7053	-1.73316
Ta1 Ti1 Cr1 Mo1 C4	Full Formula (Ta1 Ti1 Cr1 Mo1 C4) Reduced Formula: TaTiCrMoC4 abc : 4.339674 4.320584 4.336320 angles: 90.000000 90.000000 90.000000 pbc : True True True Sites (8) # SP a b c --- ---- ---- ---- ---- 0 C -0 0.5 0 1 C 0.5 -0 -0 2 C -0 -0 0.5 3 C 0.5 0.5 0.5 4 Ta -0 -0 0 5 Ti -0 0.5 0.5 6 Mo 0.5 -0 0.5 7 Cr 0.5 0.5 -0	461.408	-78.7	-1.67
Ta1 Ti1 Cr1 W1 C4	Full Formula (Ta1 Ti1 Cr1 W1 C4) Reduced Formula: TaTiCrWC4 abc : 4.334376 4.322285 4.339345 angles: 90.000000 90.000000 90.000000 pbc : True True True Sites (8) # SP a b c --- ---- ---- --- ---- 0 C -0 0.5 0 1 C 0.5 0 -0 2 C 0 0 0.5 3 C 0.5 0.5 0.5 4 Ta -0 0 0 5 Ti 0 0.5 0.5 6 W 0.5 0 0.5 7 Cr 0.5 0.5 0	476.131	-80.8832	-1.9179
Zr1 Ta1 Ti1 V1 C4	Full Formula (Zr1 Ta1 Ti1 V1 C4) Reduced Formula: ZrTaTiVC4 abc : 4.426945 4.431248 4.451778 angles: 90.000000 90.000000 90.000000 pbc : True True True Sites (8) # SP a b c --- ---- ---- ---- ---- 0 C 0 0.5 -0 1 C 0.5 -0 0 2 C -0 -0 0.5 3 C 0.5 0.5 0.5 4 Ta 0 -0 -0 5 Zr 0 0.5 0.5 6 V 0.5 -0 0.5 7 Ti 0.5 0.5 0	464.43	-78.583	-1.76787
Ta1 Cr1 Mo1 W1 C4	Full Formula (Ta1 Cr1 Mo1 W1 C4) Reduced Formula: TaCrMoWC4 abc : 4.346211 4.352471 4.342782 angles: 90.000000 90.000000 90.000000 pbc : True True True Sites (8) # SP a b c --- ---- ---- --- ---- 0 C 0 0.5 0 1 C 0.5 0 -0 2 C -0 0 0.5 3 C 0.5 0.5 0.5 4 Ta 0 0 0 5 Mo -0 0.5 0.5 6 W 0.5 0 0.5 7 Cr 0.5 0.5 -0	473.201	-81.75	-1.76875
Hf1 Zr1 Nb1 V1 C4	Full Formula (Hf1 Zr1 Nb1 V1 C4) Reduced Formula: HfZrNbVC4 abc : 4.499754 4.530671 4.524199 angles: 90.000000 90.000000 90.000000 pbc : True True True Sites (8) # SP a b c --- ---- ---- --- ---- 0 C -0 0.5 0 1 C 0.5 0 -0 2 C -0 0 0.5 3 C 0.5 0.5 0.5 4 Zr 0 0 -0 5 Hf -0 0.5 0.5 6 V 0.5 0 0.5 7 Nb 0.5 0.5 -0	445.12	-79.1485	-1.68106
Hf1 Zr1 Ti1 V1 C4	Full Formula (Hf1 Zr1 Ti1 V1 C4) Reduced Formula: HfZrTiVC4 abc : 4.463045 4.501933 4.498155 angles: 90.000000 90.000000 90.000000 pbc : True True True Sites (8) # SP a b c --- ---- ---- --- ---- 0 C 0 0.5 0 1 C 0.5 0 -0 2 C -0 0 0.5 3 C 0.5 0.5 0.5 4 Zr 0 0 0 5 Hf -0 0.5 0.5 6 V 0.5 0 0.5 7 Ti 0.5 0.5 -0	416.035	-76.8744	-1.4918
Hf1 Zr1 V1 Mo1 C4	Full Formula (Hf1 Zr1 V1 Mo1 C4) Reduced Formula: HfZrVMoC4 abc : 4.456756 4.496637 4.495028 angles: 90.000000 90.000000 90.000000 pbc : True True True Sites (8) # SP a b c --- ---- ---- --- ---- 0 C 0 0.5 -0 1 C 0.5 0 0 2 C 0 0 0.5 3 C 0.5 0.5 0.5 4 Zr -0 0 0 5 Hf 0 0.5 0.5 6 V 0.5 0 0.5 7 Mo 0.5 0.5 -0	431.887	-78.3802	-1.42252
Hf1 Zr1 V1 W1 C4	Full Formula (Hf1 Zr1 V1 W1 C4) Reduced Formula: HfZrVWC4 abc : 4.456627 4.491482 4.487786 angles: 90.000000 90.000000 90.000000 pbc : True True True Sites (8) # SP a b c --- ---- ---- ---- ---- 0 C -0 0.5 -0 1 C 0.5 -0 0 2 C 0 -0 0.5 3 C 0.5 0.5 0.5 4 Zr 0 -0 -0 5 Hf -0 0.5 0.5 6 V 0.5 -0 0.5 7 W 0.5 0.5 0	453.308	-80.553	-1.66912
Hf1 Zr1 V1 Cr1 C4	Full Formula (Hf1 Zr1 V1 Cr1 C4) Reduced Formula: HfZrVCrC4 abc : 4.382625 4.458579 4.463777 angles: 90.000000 90.000000 90.000000 pbc : True True True Sites (8) # SP a b c --- ---- ---- ---- ---- 0 C -0 0.5 -0 1 C 0.5 -0 0 2 C -0 -0 0.5 3 C 0.5 0.5 0.5 4 Zr 0 0 -0 5 Hf -0 0.5 0.5 6 V 0.5 -0 0.5 7 Cr 0.5 0.5 0	405.478	-75.8138	-1.51422
Zr1 Ta1 V1 Mo1 C4	Full Formula (Zr1 Ta1 V1 Mo1 C4) Reduced Formula: ZrTaVMoC4 abc : 4.428478 4.448154 4.439873 angles: 90.000000 90.000000 90.000000 pbc : True True True Sites (8) # SP a b c --- ---- ---- --- ---- 0 C -0 0.5 -0 1 C 0.5 0 -0 2 C 0 0 0.5 3 C 0.5 0.5 0.5 4 Ta -0 0 -0 5 Zr -0 0.5 0.5 6 V 0.5 0 0.5 7 Mo 0.5 0.5 0	474.291	-79.8468	-1.66835
Hf1 Zr1 Ti1 Nb1 C4	Full Formula (Hf1 Zr1 Ti1 Nb1 C4) Reduced Formula: HfZrTiNbC4 abc : 4.542513 4.553847 4.556710 angles: 90.000000 90.000000 90.000000 pbc : True True True Sites (8) # SP a b c --- ---- --- --- --- 0 C 0 0.5 0 1 C 0.5 0 0 2 C 0 0 0.5 3 C 0.5 0.5 0.5 4 Zr 0 0 0 5 Hf 0 0.5 0.5 6 Nb 0.5 0 0.5 7 Ti 0.5 0.5 0	455.656	-79.4386	-1.68732
Hf1 Zr1 Nb1 Mo1 C4	Full Formula (Hf1 Zr1 Nb1 Mo1 C4) Reduced Formula: HfZrNbMoC4 abc : 4.525454 4.551547 4.554620 angles: 90.000000 90.000000 90.000000 pbc : True True True Sites (8) # SP a b c --- ---- ---- --- ---- 0 C -0 0.5 0 1 C 0.5 0 -0 2 C -0 0 0.5 3 C 0.5 0.5 0.5 4 Zr -0 0 0 5 Hf -0 0.5 0.5 6 Nb 0.5 0 0.5 7 Mo 0.5 0.5 0	455.503	-80.6855	-1.58569
Hf1 Zr1 Nb1 W1 C4	Full Formula (Hf1 Zr1 Nb1 W1 C4) Reduced Formula: HfZrNbWC4 abc : 4.522065 4.545443 4.546368 angles: 90.000000 90.000000 90.000000 pbc : True True True Sites (8) # SP a b c --- ---- --- --- ---- 0 C 0 0.5 0 1 C 0.5 0 -0 2 C 0 0 0.5 3 C 0.5 0.5 0.5 4 Zr 0 0 0 5 Hf 0 0.5 0.5 6 Nb 0.5 0 0.5 7 W 0.5 0.5 0	472.875	-82.7818	-1.82272
Hf1 Zr1 Nb1 Cr1 C4	Full Formula (Hf1 Zr1 Nb1 Cr1 C4) Reduced Formula: HfZrNbCrC4 abc : 4.481611 4.515473 4.525368 angles: 90.000000 90.000000 90.000000 pbc : True True True Sites (8) # SP a b c --- ---- ---- ---- --- 0 C 0 0.5 0 1 C 0.5 0 0 2 C 0 0 0.5 3 C 0.5 0.5 0.5 4 Zr -0 -0 0 5 Hf 0 0.5 0.5 6 Nb 0.5 0 0.5 7 Cr 0.5 0.5 0	428.202	-78.0644	-1.67055
Hf1 Zr1 Ti1 Mo1 C4	Full Formula (Hf1 Zr1 Ti1 Mo1 C4) Reduced Formula: HfZrTiMoC4 abc : 4.501551 4.521021 4.522940 angles: 90.000000 90.000000 90.000000 pbc : True True True Sites (8) # SP a b c --- ---- --- ---- ---- 0 C 0 0.5 -0 1 C 0.5 0 -0 2 C 0 -0 0.5 3 C 0.5 0.5 0.5 4 Zr 0 0 -0 5 Hf 0 0.5 0.5 6 Ti 0.5 -0 0.5 7 Mo 0.5 0.5 0	447.043	-78.5455	-1.41319
Hf1 Zr1 Ti1 W1 C4	Full Formula (Hf1 Zr1 Ti1 W1 C4) Reduced Formula: HfZrTiWC4 abc : 4.497236 4.515806 4.515442 angles: 90.000000 90.000000 90.000000 pbc : True True True Sites (8) # SP a b c --- ---- ---- ---- ---- 0 C -0 0.5 0 1 C 0.5 -0 -0 2 C 0 -0 0.5 3 C 0.5 0.5 0.5 4 Zr 0 -0 0 5 Hf -0 0.5 0.5 6 Ti 0.5 -0 0.5 7 W 0.5 0.5 -0	466.46	-80.7649	-1.66561
Hf1 Zr1 Ti1 Cr1 C4	Full Formula (Hf1 Zr1 Ti1 Cr1 C4) Reduced Formula: HfZrTiCrC4 abc : 4.441860 4.486286 4.497087 angles: 90.000000 90.000000 90.000000 pbc : True True True Sites (8) # SP a b c --- ---- --- --- --- 0 C 0 0.5 0 1 C 0.5 0 0 2 C 0 0 0.5 3 C 0.5 0.5 0.5 4 Zr 0 0 0 5 Hf 0 0.5 0.5 6 Ti 0.5 0 0.5 7 Cr 0.5 0.5 0	399.981	-75.6998	-1.46998
Hf1 Zr1 Mo1 W1 C4	Full Formula (Hf1 Zr1 Mo1 W1 C4) Reduced Formula: HfZrMoWC4 abc : 4.478809 4.524519 4.522044 angles: 90.000000 90.000000 90.000000 pbc : True True True Sites (8) # SP a b c --- ---- ---- --- ---- 0 C 0 0.5 -0 1 C 0.5 0 0 2 C 0 0 0.5 3 C 0.5 0.5 0.5 4 Zr -0 0 -0 5 Hf 0 0.5 0.5 6 Mo 0.5 0 0.5 7 W 0.5 0.5 -0	468.513	-81.9162	-1.55203
